# Supplementary material for: Assignment of the absolute configuration of secondary alcohols by 13C NMR and its correlation with methyl-1-(chloromethyl)-oxopyrrolidine-2-carboxylate and quantum-mechanical GIAO calculations
Source: Royal Society of Chemistry journal article supplement (doi:10.1039/d2nj05887a), 2023-01-01
Supplement: d2nj05887a1.pdf [file d2nj05887a1.pdf]

## Supplementary data

### Assignment of Absolute Configuration of natural products with alcohols by $^{13}\text{C}$ -NMR, using derivatization with Methyl-1-(chloromethyl)-5-oxopyrrolidine-2-carboxylate and Quantum-Mechanical GIAO Calculations.

Eréndira Torales; Serguei Fomine and Jorge Cárdenas\*

#### New Journal of Chemistry

*Instituto de Química, Universidad Nacional Autónoma de México Circuito Exterior, Ciudad Universitaria, Coyoacán 04510, México D.F., México, Fax: +52 55 5616 2217; Tel: +52 55 5622 4413; E-mail: [rjcp@unam.mx](mailto:rjcp@unam.mx)*

*Instituto de Materiales, Universidad Nacional Autónoma de México Circuito Exterior, Ciudad Universitaria, Coyoacán 04510, Ciudad de México, México.*

|                                               |     |
|-----------------------------------------------|-----|
| 1. General methods                            | S1  |
| 2. Experimental procedures                    | S2  |
| 3. NMR Spectra                                | S9  |
| 4. Experimental and Calculated $\Delta\delta$ | S42 |
| 5. Gaussian 16 Revision                       | S44 |

#### General methods

$^1\text{H}$  and  $^{13}\text{C}$  NMR were recorder on Bruker Avance 300 MHz or Bruker Avance III 400 MHz instruments using  $\text{CDCl}_3$  (99.9% D) as the solvent, with chemical shifts ( $\delta$ ) referenced to internal standards residual  $\text{CHCl}_3$  and  $\text{CDCl}_3$ , (7.26 ppm  $^1\text{H}$ , 77.0 ppm  $^{13}\text{C}$ ) Mass spectra were recorded on MStation JMS-700 high-resolution mass spectrometer. THF was distilled from potassium and benzophenone, and dichloromethane was distilled from calcium hydride. All reagents and solvents were purchased from Sigma Aldrich México and were used without further purification. Glassware for anhydrous reactions was dried in an oven at 100 °C overnight and cooled under molecular sieves as a moisture trap.

## Computational Method

B3LYP/6-311+(2d,p) model has been used for <sup>1</sup>H and <sup>13</sup>C NMR modeling. First, systematic conformational search has been performed using MMFF94 force field to ensure that all conformations have been tested and the global minimum conformation has been selected. Then the geometries of lowest energy conformers were optimized at B3LYP/6-311+(2d,p) level and GIAO Magnetic shielding tensor were calculated at the same level. The same calculations were repeated for TMS standard. The difference between the corresponding isotropic shielding tensors gave chemical shifts.

## Experimental Procedures

### General procedure for preparation of Derivatization Chiral agent

#### Methyl-1-(Chloromethyl)-2-pyrrolidon-5-carboxylate 1-(S) and 1-(R).

A mixture of methyl pyroglutamate (500 mg, 3.49 mmol), paraformaldehyde (170 mg, 5.6 mmol) and chlorotrimethylsilane (2.3 mL, 17.9 mmol) was stirred at room temperature for 3 h. Excess of chlorotrimethylsilane was removed under vacuum and paraformaldehyde was removed by distillation in Kugelrohr at 100 °C. <sup>1</sup>H NMR (300 MHz, CDCl<sub>3</sub>), 5.72 ppm (d, *J*=10.2 Hz, 1H), 4.9 ppm (d, *J*=10.2 Hz, 1H), 4.45 ppm (dd, *J*= 8, 4 Hz, 1H), 3.79 ppm (s, 3H), 2.3 ppm (m, 4H).

#### General procedure for preparation 1-(alkoxy-methyl)-methyl-2-pyrrolidine-5-carboxylate derivatives with 1-(S) or 1-(R) and NaH.

Sodium hydride (2.5 equiv., 60% in mineral oil) was added to a solution of alcohol (1 equiv.) in dried THF at 0°C, under nitrogen atmosphere. The mixture was stirred by 10 minutes, then **1-(S)** or **1-(R)** (3 equiv.) in THF was added. The mixture was stirred by refluxed for 6-12 h. A saturated solution of NH<sub>4</sub>Cl was added and THF was removed and extracted with ethyl acetate. Organic extracts were dried over anhydrous sodium sulfate, filtered, and concentrated. The mixture was purified by flash chromatography.

#### General procedure for preparation 1-(alkoxy-methyl)-methyl-2-pyrrolidine-5-carboxylate derivatives with 1-(S) or 1-(R) with Silver triflate.

Silver trifluoromethanesulfonate (AgOTf) (1.2 equiv.) was added in absence of light to a mixture of alcohol (1 equiv), **1-(S)** or **1-(R)** (3 equiv) and Hydrotalcite (HT) (50 mg per mmol of alcohol) in dried DCM. The mixture was stirred for 3-12h. The mixture was filtered over Celite and washed with brine. Organic extracts were dried over calcium chloride, and concentrated. The mixture was purified by flash chromatography.

#### Methyl-(S)-1-(((1R,2S,5R)-2-isopropyl-5-methylcyclohexyl)oxy)methyl)-5-oxopyrrolidine-2-carboxylate **2a**.

A mixture of (-)-Menthol **2-(R)** (78 mg, 0.5 mmol), NaH (24 mg, 0.6 mmol), **1-(S)** (114 mg, 0.6 mmol) in dried THF was refluxed for 12 h, as a general procedure. the crude reaction mixture was purified by column chromatography with n-hexane/Ethyl acetate 80:20 to yield 83 mg of **2a** (52%). <sup>1</sup>H NMR (400 MHz, CDCl<sub>3</sub>), δ 5.29 (d, *J* = 11.2 Hz, 1H), 4.40 (dd, *J* = 9.2, 3.0 Hz, 1H), 4.32 (d, *J* = 11.2, 1H), 3.76 (s, 3H), 3.15 (td, *J* = 10.4, 4.2 Hz, 1H), 2.55 – 2.26 (m, 3H), 2.22-2.17(m,1H), 2.14-2.06(m, 2H), 1.65 – 1.57 (m, 2H), 1.42-1.31 (m, 1H), 1.20-1.12 (m, 1H), 0.92-0.71 (m,3H), 0.92 (d, *J* = 6.5 Hz, 3H),

0.88 (d, J = 7.0 Hz, 3H), 0.69 (d, J = 7.0 Hz, 3H). <sup>13</sup>C NMR (100 MHz, CDCl<sub>3</sub>) δ 175.85, 172.4, **76.4**, **68.6**, 57.7, 52.6, **48.1**, **40.1**, 34.5, 31.4, 29.7, 25.6, 23.0, 22.3, 21.2, 15.8. ESI-MS m/z (rel. intensity, %): M<sup>+</sup> 311(0.5), 268 (1), 252(13), 224(2), 222(1), 182(1), 172(8), 156(100), 128(75), 84(62), 68(19), 41(15), 29(4), 27(3), 15(2). ESI-HRMS m/z: C<sub>17</sub>H<sub>30</sub>N<sub>1</sub>O<sub>4</sub> [M+1] calculated 312.21748 observed. 312.21717. [ $\alpha$ ]<sub>D</sub><sup>20</sup> = -105.2 (c 0.25, CHCl<sub>3</sub>)

**Methyl-(S)-1-((((1S,2R,5S)-2-isopropyl-5-methylcyclohexyl)oxy)methyl)-5-oxopyrrolidine-2-carboxylate 2b.**

A mixture of (+)-Menthol **2-(S)** (78 mg, 0.5 mmol), NaH (24 mg, 0.6 mmol), **1-(S)** (114 mg, 0.6 mmol) in dried THF was refluxed for 12 h, as a general procedure. The crude material was purified by column chromatography with n-hexane/Ethyl acetate 80:20 to yield 104 mg of **2b** (65%). <sup>1</sup>H NMR (400 MHz, CDCl<sub>3</sub>) δ 5.20 (d, J = 9.9 Hz, 1H), 4.38 (dd, J = 8.9, 3.7 Hz, 1H), 4.32 (d, J = 10.0 Hz, 1H), 3.69 (s, 3H), 3.14 (td, J = 10.6, 4.4 Hz, 1H), 2.53 – 2.20 (m, 3H), 2.12 – 1.94 (m, 2H), 1.92-1.87 (m, 1H), 1.63-1.55(m, 2H), 1.38 – 1.28 (m, 1H), 1.2-1.1 (m-1H), 0.99-0.80(m-3H), 0.83 (d, J = 1.72 Hz, 3H), 0.81 (d, J = 1.15 Hz, 3H), 0.71 (d, J = 7.0 Hz, 3H). <sup>13</sup>C NMR (100 MHz, CDCl<sub>3</sub>) δ 175.4, 172.4, **79.4**, **71.8**, 57.6, 52.5, **48.6**, **41.9**, 34.4, 31.5, 29.9, 25.7, 23.2, 22.9, 22.4, 21.2, 16.2, DART<sup>+</sup> m/z (rel intensity, %): [2M+2] 624 (14), [2M+1] 623 (32), 467 (28), 329 (14), [M+2] 313 (13), [M+1] 312 (100), 299 (14), 174(17), 156 (98), 128 (23). ESI-HRMS m/z: C<sub>17</sub>H<sub>30</sub>N<sub>1</sub>O<sub>4</sub> [M+1] calculated 312.21748, observed 312.21750. [ $\alpha$ ]<sub>D</sub><sup>20</sup> = +11.29 (c 1, CHCl<sub>3</sub>).

**Methyl-(S)-1-((((3S,4aR,6aR,6bS,8aS,11R,12S,12aS,14aR,14bR)-8a-(methoxycarbonyl)-4,4,6a,6b,11,12,14b-heptamethyl-1,2,3,4,4a,5,6,6a,6b,7,8,8a,9,10,11,12,12a,14,14a,14b-icosahydricen-3-yl)oxy)methyl)-5-oxopyrrolidine-2-carboxylate, 3a.**

A mixture of **Ursolic acid Methyl ester 3** (42 mg, 0.089 mmol), NaH (8mg, 0.2 mmol), **1-(S)** (37 mg, 0.19 mmol) in dried THF was refluxed for 16 h, as a general procedure. the crude reaction mixture was purified by column chromatography with n-hexane/Ethyl acetate 90:10 to yield 16 mg of **3a** (28%). <sup>1</sup>H NMR (300 MHz, CDCl<sub>3</sub>) δ. 5.22 (t, J = 3.9 Hz, 1H), 5.18 (d, J = 10.3 Hz, 1H), 4.47 (d, J = 10.2 Hz, 1H), 4.11 (dd, J = 8.6, 3.24 Hz, 1H), 3.75 (s, 3H), 3.59 (s, 3H), 3.00 (dd, J = 9.9, 5.2 Hz, 1H), 2.58-2.10 (m, 7H), 1.97 (dd, J = 12.3, 4.47 Hz, 1H), 1.88 (dd, J = 8.64, 3.57 Hz, 1H), 1.79-1.29 (m, 18H), 1.05 (s, 3H), 0.94 (s, 6H), 0.89 (s, 3H), 0.84 (d, J = 6.4 Hz, 3H), 0.73 (d, J = 5.7 Hz, 6H). <sup>13</sup>C NMR (75 MHz, CDCl<sub>3</sub>) δ 178.2, 175.5, 172.4, 138.3, 125.6, **87.2**, **72.9**, 57.9, 55.4, 53.0, 52.6, 51.6, 48.2, 47.6, 42.1, 39.6, 39.1, **39.0**, 39.0, 38.7, 36.9, 36.8, 33.0, 30.8, 29.9, 28.1, 28.1, **24.8**, 24.3, 23.7, 23.4, 23.1, 21.3, 18.3, 17.2, 17.0, 16.5, 15.6. DART<sup>+</sup> m/z (rel intensidad, %): [M+2] 627 (31), [M+1] 626 (75) 608 (45), 454 (35), 453 (100), 329 (12), 299 (13), 156 (56), 144 (16), 117 (29), ESI-HRMS m/z: C<sub>38</sub>H<sub>60</sub>N<sub>1</sub>O<sub>6</sub> [M+1] calculated 626.44206 observed. 626.44055 [ $\alpha$ ]<sub>D</sub><sup>20</sup> = +17.95 (c 0.49, CHCl<sub>3</sub>).

**Methyl-(R)-1-((((3S,4aR,6aR,6bS,8aS,11R,12S,12aS,14aR,14bR)-8a-(methoxycarbonyl)-4,4,6a,6b,11,12,14b-heptamethyl-1,2,3,4,4a,5,6,6a,6b,7,8,8a,9,10,11,12,12a,14,14a,14b-icosahydricen-3-yl)oxy)methyl)-5-oxopyrrolidine-2-carboxylate, 3b.**

A mixture of **Ursolic acid methyl ester 3** (42 mg, 0.089 mmol), NaH (8mg, 0.2 mmol), **1-(R)** (37 mg, 0.19 mmol) in dried THF was refluxed for 16 h, as a general procedure. the crude product was purified by column chromatography with n-hexane/Ethyl acetate 90:10 to yield 14 mg of **3b** (16%). <sup>1</sup>H NMR (300 MHz, CDCl<sub>3</sub>) δ. 5.30 – 5.18 (m, 2H), 4.44 (dd, J = 9.0, 2.9 Hz, 1H), 4.37 (d, J = 11.1 Hz, 1H), 3.77 (s, 3H), 3.59 (s, 3H), 2.91 (dd, J = 11.6, 4.3 Hz, 1H), 2.57 – 2.02 (m, 7H), 1.97 (dd, J = 12.9, 4.8 Hz, 1H), 1.89 (dd, J = 8.8, 3.3 Hz, 1H), 1.78 – 1.22 (m, 18H), 1.06 (s, 3H), 0.94 (s, 3H), 0.91 (s, 3H), 0.88 (s, 3H), 0.84 (d, J = 6.4 Hz, 3H), 0.73 (d, J = 6.2 Hz, 6 H). <sup>13</sup>C NMR (75 MHz, CDCl<sub>3</sub>) δ 178.2, 176.1, 172.5, 138.2, 125.7, **84.2**, **69.1**, 57.8, 55.6, 53.0, 52.6, 51.6, 48.2, 47.5, 42.1, 39.6, 39.2, 39.0, **38.4**, 38.4, 37.0, 36.8, 33.1, 30.8, 29.8, 28.2, 28.1, 24.3, 23.7, 23.4, 23.1, **22.3**, 21.3, 18.4, 17.1, 17.1, 16.4, 15.6. ESI-MS (rel. Int. %): M<sup>+</sup> 625(1), 610 (1), 566 (3), 565(3), 482 (5), 409 (6), 393 (5), 364

(9), 317 (3), 262 (68), 261(10), 203 (66), 156 (100), 128 (69), 69 (33), 57 (45), 41 (29), 27 (25). ESI-HRMS m/z: C<sub>38</sub>H<sub>60</sub>N<sub>1</sub>O<sub>6</sub> [M+1] calculated 626.44206 observed. 626.44211,  $[\alpha]_D^{20} = +55.7142$  (c 0.14, CHCl<sub>3</sub>).

#### Estradiol 3-methyl ether, **4**.

KOH (160 mg, 2.8 mmol) was added to a solution of Estrone (1g, 3.69 mmol) in dried Acetone (100 mL). Methyl iodide (0.3 mL, 4.8 mmol) was added at 0°C, in 16 mL of Acetone, the mixture was stirred at room temperature by 2.5 h; then Methyl iodide (0.04 mL, 0.64 mmol) in 5 mL of Acetone was added. The reaction mixture was stirred at room temperature for 4 h. Acetone was removed under vacuum and extracts was dissolved in ethyl acetate. Organic extracts were washed with brine and dried over anhydrous sodium sulfate, filtered and concentrated. Crude material was purified by crystallization in methanol to yield 992mg (94%) of Estrone methyl ether **4i**. NMR-<sup>1</sup>H (400 MHz, CDCl<sub>3</sub>), δ 7.23 (dd, J = 8.6, 1.2 Hz, 1H), 6.75 (dd, J = 8.6, 2.8 Hz, 1H), 6.68 (d, J = 2.8 Hz, 1H), 3.81 (s, 3H), 3.00 – 2.87 (m, 2H), 2.58 – 1.93 (m, 7H), 1.75 – 1.38 (m, 6H), 0.94 (s, 3H). NaBH<sub>4</sub> (125 mg, 3.12 mmol) was added to a solution of **4i** (148 mg, 0.5 mmol) in 15 mL of methanol at 0°C. The mixture was stirred by 4 h. Acetic acid (0.2 mL) was added, methanol was removed under vacuum, the mixture was dissolved in ethyl acetate and washed by brine, dried over anhydrous sodium sulfate, filtered, concentrated and crystalized in methanol providing 103 mg with a yield of 69% of **4**. -<sup>1</sup>H NMR (300 MHz, CDCl<sub>3</sub>), δ. 7.22 (d, J = 8.4 Hz, 1H), 6.72 (dd, J = 8.4, 2.7 Hz, 1H), 6.64 (d, J = 2.7 Hz, 1H), 3.79 (s, 3H), 3.74 (t, J = 8.4 Hz, 1H), 2.90-2.84 (m, 2H), 2.45 – 1.09 (m, 14H), 0.79 (s, 3H).

#### Methyl-(S)-1-(((8R,9S,13S,14S,17S)-3-methoxy-13-methyl-7,8,9,11,12,13,14,15,16,17-decahydro-6H-cyclopenta[a]phenanthren-17-yl)oxy)methyl)-5-oxopyrrolidin-2-carboxilate, **4a**.

A mixture of **4** (40 mg, 0.13 mmol), NaH (7 mg, 0.16 mmol), **1-(S)** (52 mg, 0.27 mmol) in dried THF was refluxed for 16 h, as a general procedure. the crude product was purified by column chromatography with n-hexane/Ethyl acetate 80:20 to yield 36 mg of **4a** (57%). <sup>1</sup>H NMR (300 MHz, CDCl<sub>3</sub>), δ. 7.20 (d, J = 8.6 Hz, 1H), 6.70 (dd, J = 8.6, 2.7 Hz, 1H), 6.62 (d, J = 2.6 Hz, 1H), 5.11 (d, J = 10.5 Hz, 1H), 4.57 (d, J = 10.4 Hz, 1H), 4.38 (dd, J = 8.9, 3.2 Hz, 1H), 3.7705 (s, 3H), 3.7703 (s, 3H), 3.49 (t, J = 8.2 Hz, 1H), 2.86-2.81 (m, 2H), 2.63 – 1.13 (m, 17H), 0.76 (s, 3H). <sup>13</sup>C-NMR-(75 MHz, CDCl<sub>3</sub>) δ 175.6, 172.1, 157.4, 138.1, 132.7, 126.5, 113.9, 111.6, **88.0**, **72.2**, 57.8, 55.3, 52.6, 49.8, 44.0, **43.5**, 38.7, 37.5, 30.0, 29.9, **28.4**, 27.3, 26.4, 23.2, 23.1, 11.8. ESI-MS m/z (rel intensity %): 441(28), 413 (1), 382 (3), 352 (0.5), 314 (0.5), 285 (25), 267 (23), 227 (9), 201 (20), 173 (42), 157 (91), 128 (100), 91 (21), 57 (30), 41 (33), 28 (18), 18 (4). ESI-HRMS m/z: C<sub>26</sub>H<sub>36</sub>N<sub>1</sub>O<sub>5</sub> [M+1] calculated 442.25935, observed. 442.25883,  $[\alpha]_D^{20} = +1.81^\circ$  (c 0.55, CHCl<sub>3</sub>).

#### Methyl-(R)-1-(((8R,9S,13S,14S,17S)-3-methoxy-13-methyl-7,8,9,11,12,13,14,15,16,17-decahydro-6H-cyclopenta[a]phenanthren-17-yl)oxy)methyl)-5-oxopyrrolidin-2-carboxilate, **4b**.

A mixture of **4** (68 mg, 0.238 mmol), NaH (12 mg, 0.28 mmol), **1-(R)** (67 mg, 0.35 mmol) in dried THF was refluxed for 16 h, as a general procedure. the crude product was purified by column chromatography with n-hexane/Ethyl acetate 80:20 to yield 56 mg of **4b** (53%). <sup>1</sup>H NMR (300 MHz, CDCl<sub>3</sub>), δ 7.18 (d, J = 8.5 Hz, 1H), 6.70 (dd, J = 8.6, 2.7 Hz, 1H), 6.62 (d, J = 2.6 Hz, 1H), 5.11 (d, J = 10.6 Hz, 1H), 4.53 (d, J = 10.6 Hz, 1H), 4.37 (dd, J = 8.9, 3.2 Hz, 1H), 3.78 (s, 3H), 3.77 (s, 3H), 3.42 (t, J = 8.2 Hz, 1H), 2.92 – 2.76 (m, 2H), 2.66 – 1.07 (m, 17H), 0.77 (s, 3H). NMR-<sup>13</sup>C (75 MHz, CDCl<sub>3</sub>) δ 175.8, 172.5, 157.6, 138.1, 132.7, 126.4, 113.9, 111.6, **86.4**, **70.9**, 57.6, 55.3, 52.6, 50.1, 44.0, **43.1**, 38.7, 37.4, 30.0, 29.9, **27.5**, 27.3, 26.4, 23.2, 23.1, 11.8. ESI-MS m/z (rel intensity %): 441(93), 413 (2), 382 (7), 352 (1), 316 (1), 285(58), 267 (33), 241 (10.3), 201 (16), 173 (45), 156 (100), 128 (87), 84 (20), 59 (20), 43(34), 41 (15), 29 (4), 15 (3). ESI-HRMS m/z: C<sub>26</sub>H<sub>36</sub>N<sub>1</sub>O<sub>5</sub> [M+1] calculated 442.25935, observed. 442.25806,  $[\alpha]_D^{20} = +45.2^\circ$  (c 0.46, CHCl<sub>3</sub>).

**(5R,6S,8aS)-5,6-dihydroxi-5,8a-dimethyl-3-(propan-2-iliden)octahydronaphtalen-2(1H)-ona, Cuauhtemone, 5.**

A 2.5 N aqueous solution of LiOH (2mL, 5 mmol) was added to a solution of 3-O-[2,3-epoxi-2-metilbutirol] Cuauhtemone (100 mg, 0.29 mmol) in THF (10 mL). The mixture was stirred at room temperature for 1.5 h. THF was removed by distillation; then the mixture was acidulated with HCl 1N and dissolved in Ethyl acetate, the mixture was washed with brine and dried over anhydrous sodium sulfate, filtered, and concentrated to give 67 mg (91%) of **5**. <sup>1</sup>H-NMR (300 MHz, CDCl<sub>3</sub>), δ 3.68 (d, J = 2.9 Hz, 1H), 2.96 (dd, J = 14.7, 3.5 Hz, 1H), 2.24 (d, J = 4.7 Hz, 2H), 2.11 – 2.05 (m, 3H), 2.03 (s, 3H), 1.85 (s, 1H), 1.81-1.70 (m, 4H), 1.23 (s, 6H), 0.95 (s, 3H).

**Methyl-(2S)-1-(((1R,2S,4aS)-1-hydroxy-1,4a-dimethyl-6-oxo-7-(propan-2-iliden)decahydronaphtalen-2-yl)oxy)methyl)-5-oxopirrolidine-2-carboxylate, 5a.**

A mixture of **5** (40 mg, 0.15 mmol), NaH (7 mg, 1.8 mmol), **1-(S)** (35mg, 0.18 mmol) in dried THF was refluxed by 12 h, as a general procedure. the crude product was purified by column chromatography with n-hexane/Ethyl acetate to yield 34mg of **5a** (53%). <sup>1</sup>H NMR (300 MHz, CDCl<sub>3</sub>), δ 4.95 (d, J = 10.7 Hz, 1H), 4.79 (d, J = 10.7 Hz, 1H), 4.34 (dd, J = 8.87, 3.72 Hz, 1H), 3.79 (s, 3H), 3.53 (dd, J = 3.7, 1.8 Hz, 1H), 2.98 (dd, J = 15.3, 4.2 Hz, 1H), 2.70 – 2.25 (m, 6H), 2.18 (d, J = 2.9 Hz, 3H), 2.17 – 2.07 (m, 3H), 2.01 (s, 3H), 1.92-1.85 (m, 3H), 1.83 (s, 1H), 1.17 (s, 6H), 0.93 (s, 3H). <sup>13</sup>C NMR (75 MHz, CDCl<sub>3</sub>) 202.9, 176.1, 172.5, 144.4, 131.5, **81.9**, 72.4, **71.9**, 60.2, 59.5, 52.8, 47.2, 36.3, 33.3, 29.8, 29.6, 25.6, 23.4, 23.3, 23.0, 22.8, 20.9, 18.9. ESI-MS m/z (rel intensity %): 406 (20), 388 (10), 329(18), 299 (24), 156 (100), 144 (24), 128 (12). ESI-HRMS m/z: C<sub>22</sub>H<sub>33</sub>N<sub>1</sub>O<sub>6</sub> [M+1] calculated 407.23079, observed 407.23011 [ $\alpha$ ]<sub>D</sub><sup>20</sup> = +26.3 (c 0.285, CHCl<sub>3</sub>).

**Methyl-(2R)-1-(((1R,2S,4aS)-1-hydroxy-1,4a-dimethyl-6-oxo-7-(propan-2-iliden)decahydronaphtalen-2-yl)oxy)methyl)-5-oxopirrolidine-2-carboxylate, 5b.**

A mixture of **5** 40 mg, 0.15 mmol), NaH (7 mg, 1.8 mmol), **1-(R)** (35mg, 0.18 mmol) in dried THF was refluxed for 12 h, as a general procedure. the crude product was purified by column chromatography with n-hexane/Ethyl acetate to yield 28 mg of **5b** (45%). <sup>1</sup>H NMR (300 MHz, CDCl<sub>3</sub>), δ 5.02 (d, J = 11.4 Hz, 3H), 4.72 (d, J = 11.4 Hz, 3H), 4.45 (dd, J = 8.9, 3.2 Hz, 5H), 4.14 (q, J = 6.9 Hz, 4H), 3.75 (s, 3H), 3.70 (s, 3H), 2.28-2.03 (m, 4H), 1.35 (d, J = 6.9 Hz, 9H). NMR-<sup>13</sup>C (75 MHz, CDCl<sub>3</sub>) δ 202.9, 176.2, 172.3, 144.3, 134.5, **79.1**, 72.5, **69.5**, 60.2, 58.1, 52.8, 47.5, 36.4, 33.4, 29.7, 25.8, 23.5, 23.0, 21.6, 22.8, 20.8, 18.9.

**Methyl-(S)-1-(((S)-1-(naphtalen-2-yl)etoxy)methyl)-5-oxopyrrolidin-2-carboxylate, 6a.**

A mixture of (S)-1-(naphtalen-2-yl)-ethan-1-ol **6** (69 mg, 0.40 mmol), **1-(S)** (86 mg, 0.45 mmol), HT (30 mg) and AgOTf (103 mg, 0.4 mmol) in dried DCM was stirred at room temperature for 6 h, as a general procedure. The crude product was purified by column chromatography with n-hexane/Ethyl acetate 80/20 to yield 61 mg of **8a** (46 %). <sup>1</sup>H NMR (300 MHz, CDCl<sub>3</sub>), δ 7.84-7.76 (m, 4H), 7.51 – 7.41 (m, 3H), 5.06 (d, J = 10.6 Hz, 1H), 4.66 (q, J = 6.5 Hz, 1H), 4.41 (d, J = 10.84 Hz, 1H), 4.38 (dd, J = 8.99, 3.45 Hz, 1H), 3.54 (s, 3H), 2.58-2.27 (m, 3H), 2.09-2.01 (m, 1H), 1.50 (d, J = 6.5 Hz, 2H). NMR <sup>13</sup>C (75 MHz, CDCl<sub>3</sub>) δ 175.8, 172.3, 140.3, 133.3, 133.2, 128.4, 128.0, 127.7, 126.2, 125.9, 125.5, 124.2, 75.8, 70.0, 57.9, 52.4, 29.7, 23.6, 22.9. DART+ m/z (rel intensity, %): [2M+2] 656 (12), [2M+1] 655 (28), 552 (12), 484 (15), 483 (40), 330 (20), 329 (100), 328 (16), 174 (14), 156 (32). ESI-HRMS m/z: C<sub>19</sub>H<sub>22</sub>N<sub>1</sub>O<sub>4</sub> [M+1] calculated 328.15488, observed 328.15588. [ $\alpha$ ]<sub>D</sub><sup>20</sup> = -5.45° (c 0.22, CHCl<sub>3</sub>).

**Methyl-(R)-1-(((S)-1-(naphtalen-2-yl) ethoxy) methyl)-5-oxopyrrolidin-2-carboxylate, 6b.**

A mixture of (S)-1-(naphtalen-2-yl)-ethan-1-ol **8** (35 mg, 0.420 mmol), **1-(R)** (46 mg, 0.24 mmol), HT (20 mg) and AgOTf (50 mg, 0.2 mmol) in dried DCM was stirred at room temperature for 6 h, as a

general procedure. the crude product was purified by column chromatography with n-hexane/Ethyl acetate 80/20 to yield 13 mg of **7b** (20 %). <sup>1</sup>H NMR (300 MHz, CDCl<sub>3</sub>) δ 7.94 – 7.68 (m, 4H), 7.59 – 7.38 (m, 3H), 5.16 (d, J = 11.1 Hz, 1H), 4.70 (q, J = 6.6 Hz, 1H), 4.62 (d, J = 11.2 Hz, 1H), 4.03 (dd, J = 9.5, 2.7 Hz, 1H), 3.74 (s, 3H), 2.49 – 2.16 (m, 3H), 1.94 – 1.58 (m, 1H), 1.49 (d, J = 6.5 Hz, 4H). NMR <sup>13</sup>C (75 MHz, CDCl<sub>3</sub>) δ 175.8, 172.7, 141.3, 133.3, 133.1, 128.4, 128.0, 127.7, 126.4, 126.1, 124.8, 124.0, 77.9, 71.5, 57.9, 52.6, 29.5, 24.1, 22.3. DART<sup>+</sup> m/z (rel intensity): [2M+2] 656 (13), [2M+1] 655 (30), 483 (30), [M+3] 330 (17), [M+2] 329 (100), 310 (24), 174 (25), 156 (94), 128 (32). ESI-HRMS m/z: C<sub>19</sub>H<sub>22</sub>N<sub>1</sub>O<sub>4</sub> [M+1] calculated 328.15488, observed 328.15532 [α]<sub>D</sub><sup>20</sup> = -20° (c 0.12, CHCl<sub>3</sub>).

#### **Methyl-(S)-1-(((S)-1-(2-bromophenyl) ethoxy) methyl)-5-oxopyrrolidine-2-carboxylate, 7a.**

A mixture of (S)-(-)-2-Bromide- α-methyl benzyl alcohol **7** (50 mg, 0.25 mmol), 1-(S) (60 mg, 0.33 mmol), HT (20 mg) and AgOTf (77 mg, 0.33 mmol) in dried DCM was stirred at room temperature for 8 h, as a general procedure. The crude product was purified by column chromatography with n-hexane/Ethyl acetate 90/10 to yield 31 mg of **7a** (34 %). <sup>1</sup>H NMR (300 MHz, CDCl<sub>3</sub>) δ 7.51 (d, J = 7.9 Hz, 1H), 7.46 (dd, J = 7.9, 1.5 Hz, 1H), 7.31 (t, J = 7.6 Hz, 1H), 7.12 (td, J = 7.6, 1.62 Hz, 1H), 5.00 (d, J = 10.4 Hz, 1H), 4.89 (q, J = 6.4 Hz, 1H), 4.44 (d, J = 10.4 Hz, 1H), 4.36 (dd, J = 9.0, 3.4 Hz, 1H), 3.66 (s, 3H), 2.57 – 2.7 (m, 3H), 2.15 – 2.03 (m, 1H), 1.4 (d, J = 6.39 Hz, 3H). <sup>13</sup>C NMR (75 MHz, CDCl<sub>3</sub>) δ 175.5, 172.4, 142.3, 132.9, 129.0, 127.9, 127.1, 122.5, 74.5, 70.5, 58.1, 52.5, 29.7, 23.0, 22.5. DART<sup>+</sup> m/z (rel intensity, %): [2M+1] 713 (18), 514 (9), 513 (43), [M] 356 (13), 329 (67), 299 (3), 174 (18), 156 (100), 128 (32). ESI-HRMS m/z: C<sub>15</sub>H<sub>19</sub>Br<sub>1</sub>N<sub>1</sub>O<sub>4</sub> [M+1] calculated 356.04975, observed 356.05105. [α]<sub>D</sub><sup>20</sup> = -44.7° (c 0.275, CHCl<sub>3</sub>).

#### **Methyl-(R)-1-(((S)-1-(2-bromophenyl)ethoxy)methyl)-5-oxopyrrolidine-2-carboxylate, 7b.**

A mixture of (S)-(-)-2-Bromide- α-methyl benzyl alcohol **7** (50 mg, 0.25 mmol), 1-(R) (60 mg, 0.33 mmol), HT (20 mg) and AgOTf (77 mg, 0.33 mmol) in dried DCM was stirred at room temperature for 8 h, as a general procedure. The crude product was purified by column chromatography with n-hexane/Ethyl acetate 90/10 to yield 64 mg of **7b** (71 %). <sup>1</sup>H NMR (300 MHz, CDCl<sub>3</sub>) δ 7.50-7.45 (m, 2H), 7.32 (td, J = 7.5, 1.3 Hz, 1H), 7.10 (td, J = 7.79, 1.84 Hz, 1H), 5.11 (d, J = 10.8 Hz, 1H), 4.92 (q, J = 6.4 Hz, 1H), 4.49 (d, J = 10.8 Hz, 1H), 4.21 – 4.13 (m, 1H), 3.73 (s, 3H), 2.48- 2.37 (m, 1H), 2.24 – 2.11 (m, 1H), 2.03 – 1.88 (m, 2H), 1.38 (d, J = 6.4 Hz, 3H). <sup>13</sup>C NMR (75 MHz, CDCl<sub>3</sub>) δ 175.5, 172.5, 142.9, 132.8, 128.8, 127.8, 127.3, 122.0, 75.3, 71.0, 58.1, 52.5, 29.5, 22.7, 22.3. DART<sup>+</sup> m/z (rel intensity): [2M+1] 713 (9), 511 (34), [M] 356 (15), 329 (66), 299 (19), 174 (16), 156 (100), 128 (35). ESI-HRMS m/z: C<sub>15</sub>H<sub>19</sub>Br<sub>1</sub>N<sub>1</sub>O<sub>4</sub> [M+1] calculated 356.04975, observed 356.04896. [α]<sub>D</sub><sup>20</sup> = -10.9635 (c 0.602, CHCl<sub>3</sub>).

#### **Methyl-(S)-1-(((S)-1-methoxy-1-oxopropan-2-yl)oxy)methyl)-5-oxopyrrolidine-2-carboxylate, 8a.**

A mixture of Methyl (S)-Lactate **6** (56 mg, 0.54 mmol), 1-(S) (124 mg, 0.65 mmol), HT (25 mg) and AgOTf (166 mg, 0.65 mmol) in dried DCM was stirred at room temperature by 6 h, as a general procedure. the crude product was purified by column chromatography with n-hexane/Ethyl acetate 50/50 to yield 44 mg of **8a** (31%). <sup>1</sup>H NMR (300 MHz, CDCl<sub>3</sub>) δ 5.10 (d, J = 10.8 Hz, 1H), 4.58 (d, J = 10.8 Hz, 1H), 4.42 (dd, J = 8.7, 3.3 Hz, 2H), 4.11 (q, J = 6.9 Hz, 1H), 3.75 (s, 3H), 3.73 (s, 3H), 2.60-2.29 (m, 4H), 1.38 (d, J = 6.9 Hz, 3H). NMR-<sup>13</sup>C (75 MHz, CDCl<sub>3</sub>) δ 176.1, 173.2, 172.4, 72.1, 71.0, 57.9, 52.6, 52.2, 29.6, 23.1, 18.5. DART<sup>+</sup> m/z (rel intensity %): 440 (18), [M+2] 426(14), [M+K]299(33), 285(100), 271(76), 228 (10), 156 (68), 144 (66), 130(56), 102(55). ESI-HRMS m/z: C<sub>11</sub>H<sub>18</sub>N<sub>1</sub>O<sub>6</sub> [M+1] calculated 260.11341 observed. 260.11224. [α]<sub>D</sub><sup>20</sup> = -29.54° (c 0.44, CHCl<sub>3</sub>).

**Methyl-(R)-1-(((S)-1-methoxy-1-oxopropan-2-yl) oxy)methyl)-5-oxopyrrolydin-2-carboxylate, 8b.**

A mixture of methyl (S)-Lactate **6** (57 mg, 0.54 mmol), **1-(R)** (124 mg, 0.65 mmol), HT (25 mg) and AgOTf (166 mg, 0.65 mmol) in dried DCM was stirred at room temperature for 6 h, as a general procedure. The crude product was purified by column chromatography with n-hexane/Ethyl acetate 50/50 to yield 24 mg of **6a** (17 %). <sup>1</sup>H NMR (300 MHz, CDCl<sub>3</sub>) δ: 5.02 (d, J = 11.4 Hz, 3H), 4.72 (d, J = 11.4 Hz, 3H), 4.45 (dd, J = 8.9, 3.2 Hz, 5H), 4.14 (q, J = 6.9 Hz, 4H), 3.75 (s, 3H), 3.70 (s, 3H), 2.28-2.03 (m, 4H), 1.35 (d, J = 6.9 Hz, 9H). <sup>13</sup>C NMR- (75 MHz, CDCl<sub>3</sub>) δ 176.3, 173.7, 172.6, 73.5, 71.8, 58.3, 52.6, 52.1, 29.6, 23.0, 18.6. DART<sup>+</sup> m/z (rel intensity %): [2M+1] 518 (4), 415 (14), [M+2] 261 (12), [M+1] 260 (100), 156 (41). ESI-HRMS m/z: C<sub>11</sub>H<sub>18</sub>N<sub>1</sub>O<sub>5</sub> [M+1] calculated 260.11341 observed. 260.113003. [α]<sub>D</sub><sup>20</sup> = -9.92° (c 0.252, CHCl<sub>3</sub>)

**One derivatization product**

**Hispanolone reduction to β-alcohol, 9.**

**(1R,2R,3R,8aS)-1-(2-(furan-3-yl)ethyl)-2,5,5,8a-tetramethyldecahydronaphthalene-1,3-diol. β-alcohol of hispanolone.**

NaBH<sub>4</sub> (300 mg, 0.94 mmol) was added to solution of Hispanolone (300 mg, 0.94 mmol) in dried methanol (10 mL), at 0 °C, the mixture was stirred for 16 h. sulfuric acid was added, then mixture was concentrated and dissolved in Ethyl acetate, extracted with water. Organic extracts were dried over anhydrous sodium sulfate, filtered, and concentrated. The crude product was purified by column chromatography with n-hexane/Ethyl acetate 90/10 to yield 60 mg of α-alcohol (20 %) m.p. 129 °C, 134 mg of BO<sub>3</sub> derivative (35%) m.p. 205°C, and 45 mg (15%) β-alcohol, m.p. 105°C <sup>1</sup>H NMR (300 MHz, CDCl<sub>3</sub>) δ 7.33 (t, J = 1.6 Hz, 1H), 7.23 – 7.17 (m, 1H), 6.26 (dd, J = 1.8, 0.9 Hz, 1H), 3.49 (td, J = 10.7, 5.2 Hz, 1H), 2.59 – 2.36 (m, 3H), 1.95 – 1.24 (m, 23H), 1.10 (d, J = 6.6 Hz, 2H), 0.96 (s, 2H), 0.87 (d, J = 10.7 Hz, 5H). <sup>13</sup>C NMR (75 MHz, CDCl<sub>3</sub>) δ 143.0, 138.6, 125.4, 110.9, 78.7, 73.2, 44.4, 44.0, 43.1, 41.7, 35.4, 33.7, 33.3, 32.3, 31.7, 22.1, 21.7, 18.6, 16.5, 11.5.

**Methyl (2S)-1-(((2R,3R,4R,4aS)-4-(2-(furan-3-yl)ethyl)-4-hydroxy-3,4a,8,8-tetramethyldecahydronaphthalen-2-yl)oxy)methyl)-5-oxopyrrolidine-2-carboxylate, 9.1**

A mixture of β-alcohol of hispanolone (32 mg, 0.1 mmol), NaH (6 mg, 0.4 mmol), **1-(S)** (57 mg, 0.3 mmol) in dried THF was stirred 3 h in Microwave at 100°C, as a general procedure. the crude product was purified by column chromatography with n-hexane/Ethyl acetate to yield 20 mg of **9** (40%). <sup>1</sup>H NMR (300 MHz, CDCl<sub>3</sub>) δ 7.35 (t, J = 1.7 Hz, 1H), 7.22 (dd, J = 1.6, 0.9 Hz, 1H), 6.28 – 6.26 (m, 2H), 5.28 (d, J = 10.0 Hz, 1H), 4.48 (dd, J = 8.6, 3.5 Hz, 1H), 4.43 (d, J = 9.9 Hz, 1H), 3.78 (s, 3H), 3.29 (td, J = 10.7, 5.1 Hz, 1H), 2.65 – 2.28 (m, 3H), 2.21 – 2.04 (m, 1H), 1.95 – 1.79 (m, 2H), 1.80 – 1.65 (m, 2H), 1.57 (s, 9H), 1.54 – 1.13 (m, 7H), 1.06 (d, J = 6.5 Hz, 3H), 0.95 (s, 3H), 0.87 (d, J = 10.2 Hz, 6H). <sup>13</sup>C NMR (75 MHz, CDCl<sub>3</sub>) δ 175.1, 172.2, 142.9, 138.5, 125.2, 110.8, 80.9, 78.4, 77.2, 72.0, 57.7, 52.5, 43.5, 42.8, 42.8, 41.5, 35.2, 33.5, 33.2, 32.0, 29.7, 28.5, 22.9, 21.9, 21.5, 18.5, 16.3, 11.3.

**Mixture of Methyl (2S)-1-(((2R,3R,3aR,4aS,4bS,8R,10aR)-2-hydroxy-3,7,7,10a-tetramethyltetradecahydro-3,4b-methanonaphtho[2',1':3,4]cyclohepta[1,2-b]oxiren-8-yl)oxy)methyl)-5-oxopyrrolidine-2-carboxylate--methyl (2S)-1-(((2R,3R,3aR,4aS,4bS,8R,10aR)-8-hydroxy-3,7,7,10a-tetramethyltetradecahydro-3,4b-methanonaphtho[2',1':3,4]cyclohepta[1,2-b]oxiren-2-yl)oxy)methyl)-5-oxopyrrolidine-2-carboxylate, 10.1 and methyl (2S)-1-(((2R,3R,3aR,4aS,4bS,8R,10aR)-8-hydroxy-3,7,7,10a-tetramethyltetradecahydro-3,4b-methanonaphtho[2',1':3,4]cyclohepta[1,2-b]oxiren-2-yl)oxy)methyl)-5-oxopyrrolidine-2-carboxylate, 10.2.**

A mixture of **epoxide beyerene of *Viguiera insignis*** (40 mg, 0.12 mmol), NaH (11 mg, 0.8 mmol), **1-(S)** (77 mg, 0.4 mmol) in dried THF was stirred 3 h in Microwave at 110°C, as a general procedure. the crude product was purified by column chromatography with n-hexane/Ethyl acetate 70/30 to yield 34 mg (30%) of a mixture of **10.1 and 10.2**. <sup>1</sup>H NMR (300 MHz, CDCl<sub>3</sub>) δ 5.22 (t, *J* = 10.7 Hz, 1H), 4.41 (ddt, *J* = 11.2, 6.2, 3.6 Hz, 4H), 3.78 (d, *J* = 1.0 Hz, 3H), 3.50 – 3.42 (m, 1H), 3.37 (d, *J* = 2.9 Hz, 1H), 3.22 (dd, *J* = 11.5, 4.5 Hz, 1H), 3.00 (dd, *J* = 10.9, 2.8 Hz, 1H), 2.91 (dd, *J* = 11.6, 4.2 Hz, 1H), 2.60 – 2.24 (m, 4H), 1.98 – 1.83 (m, 1H), 1.62 (d, *J* = 19.1 Hz, 2H), 1.26 (s, 1H), 1.11 (s, 2H), 1.03 (s, 2H), 0.91 (d, *J* = 2.1 Hz, 7H), 0.80 (d, *J* = 8.3 Hz, 3H). <sup>13</sup>C NMR (75 MHz, CDCl<sub>3</sub>) δ 175.9, 175.8, 172.3, 172.2, 83.7, 78.8, 77.2, 77.2, 72.1, 69.3, 69.1, 59.6, 59.2, 57.7, 57.6, 55.7, 55.5, 55.4, 55.1, 52.6, 52.5, 52.0, 51.6, 44.6, 44.3, 44.0, 43.9, 39.0, 38.8, 38.7, 38.3, 37.4, 37.1, 36.9, 36.8, 32.7, 29.7, 29.3, 28.8, 28.2, 28.2, 27.2, 23.9, 22.9, 22.1, 19.5, 18.1, 17.7, 16.2, 15.9, 15.6.

### Isoborneol/Borneol

A mixture of dry methanol (10 mL) and (-)-camphor (100 mg, 0.65 mmol) was stirred into round-bottom flask, then sodium borohydride (59 mg, 1.58 mmol) was added into the solution, and stirred for 1 h. The mixture was poured into ice water (15 mL) and filtrated under vacuum, to yield 63 mg (66.8%) of (+)-Isoborneol/(-)-borneol.

Mixture of methyl **5-oxo-1-(((1S,2R,4S)-1,7,7-trimethylbicyclo[2.2.1]heptan-2-yl)oxy)methyl)pyrrolidine-2-carboxylate** and methyl **5-oxo-1-(((1S,2S,4S)-1,7,7-trimethylbicyclo[2.2.1]heptan-2-yl)oxy)methyl)pyrrolidine-2-carboxylate**. **11.1 and 12.1**

A mixture of 80/20 (+)-isoborneo/(-)-borneol (50 mg, 0.25 mmol), **1-(S)** (60 mg, 0.33 mmol), HT (20 mg) and AgOTf (77 mg, 0.33 mmol) in dried DCM was stirred at room temperature for 8 h, as a general procedure. The crude product was purified by column chromatography with n-hexane/Ethyl acetate 90/10 to yield 31 mg of **11.1** and **12.1**. <sup>1</sup>H NMR (300 MHz, CDCl<sub>3</sub>) δ 5.05 (d, *J* = 10.5 Hz, 0.2H), 4.99 (d, *J* = 10.5 Hz, 1H), 4.46 (d, *J* = 10.5 Hz, 1H), 4.44 (d, *J* = 10.5 Hz, 0.2H), 4.30 (dd, *J* = 8.7, 3.3 Hz, 1H), 3.73 (s, 1H), 3.72 (s, 3H), 3.35 – 3.24 (m, 1H), 2.60 – 1.98 (m, 5H), 1.77 – 1.35 (m, 5H), 0.95 (td, *J* = 7.3, 6.4, 2.9 Hz, 1H), 0.89 (s, 3H), 0.83 (s, 3H), 0.79 (s, 1H), 0.77 (s.), 0.75 (s, 3H). <sup>13</sup>C NMR (75 MHz, CDCl<sub>3</sub>) δ 175.6, 175.5, 172.4, 86.5, 82.4, 72.2, 70.8, 57.8, 57.5, 52.4, 49.2, 48.9, 47.8, 46.6, 45.1, 44.9, 39.1, 35.9, 34.3, 29.9, 29.8, 29.7, 28.2, 27.1, 26.5, 23.1, 23.0, 20.2, 20.2, 19.8, 18.9.



### 3. NMR spectra

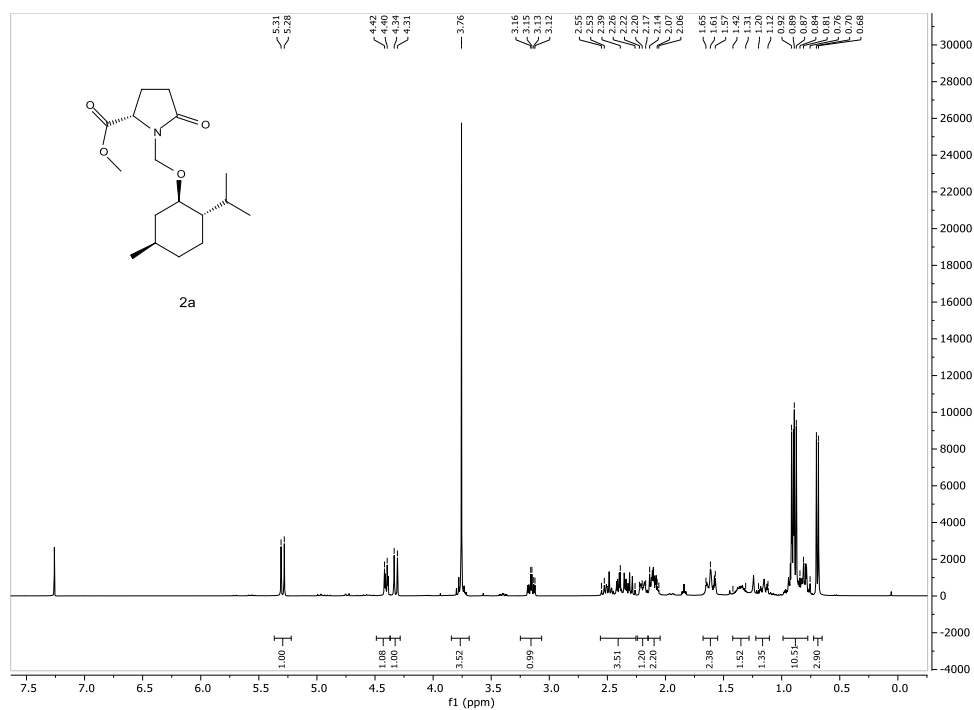

S 1. NMR- $^1\text{H}$  (400.1 MHz,  $\text{CDCl}_3$ ) of **2a**

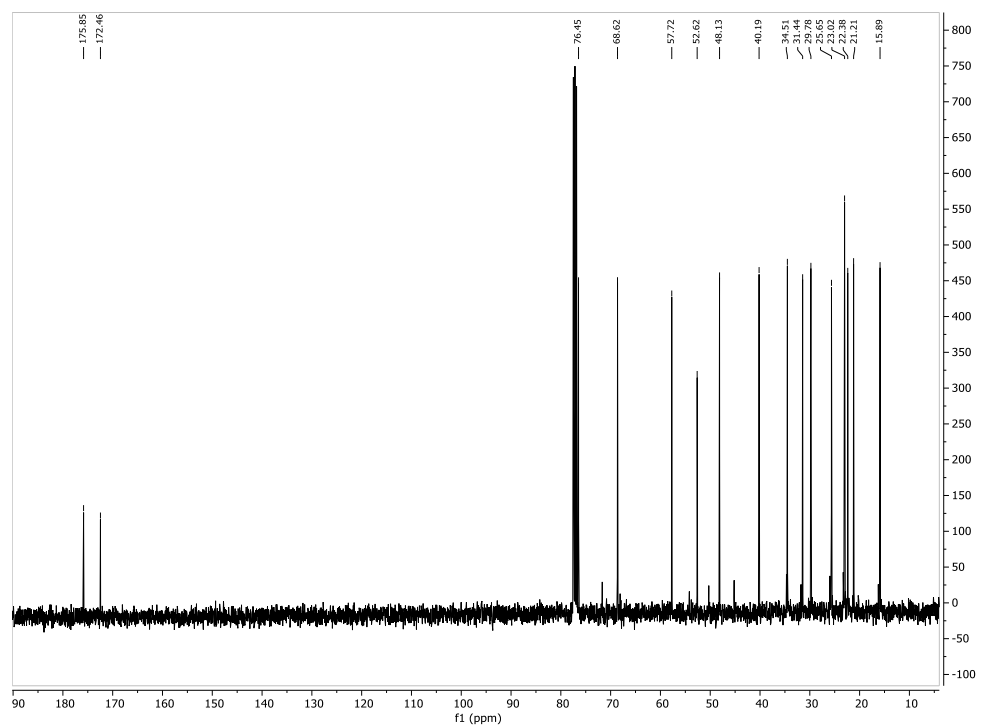

S 2. NMR- $^{13}\text{C}$  (100.6 MHz,  $\text{CDCl}_3$ ) of **2a**

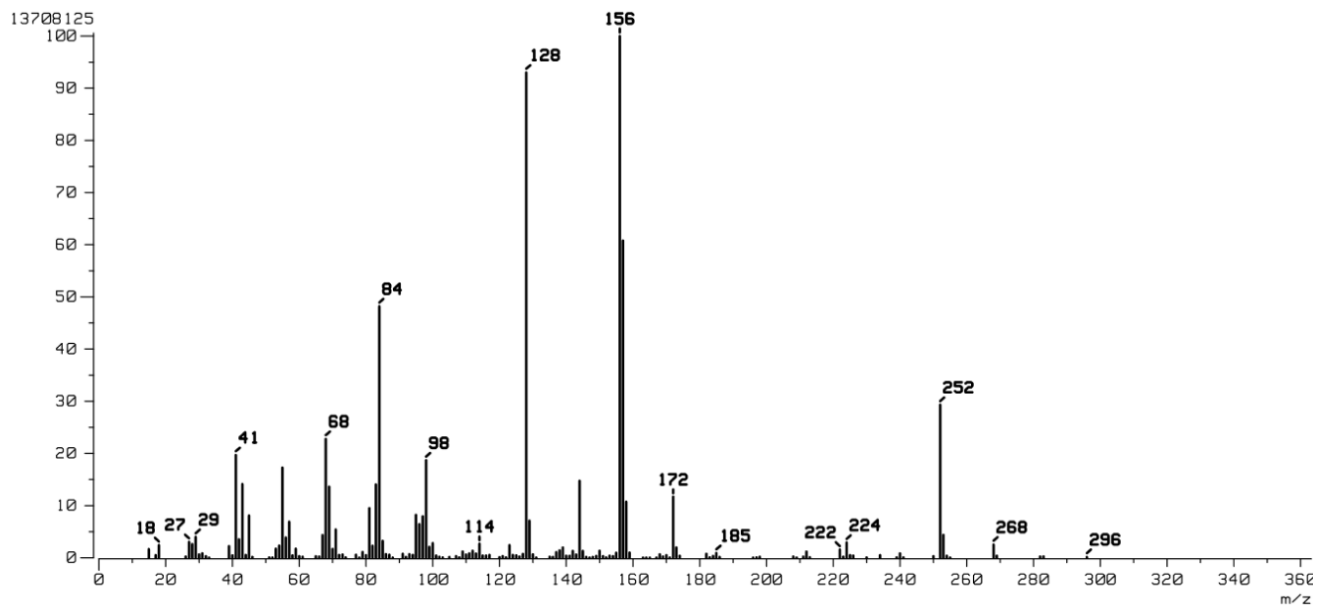

S 3. ESI-MS of 2a

Charge number:1  
 Element:<sup>12</sup>C:0 .. 40, <sup>1</sup>H:0 .. 60, <sup>14</sup>N:0 .. 4, <sup>16</sup>O:4 .. 4

Tolerance:3.00(mmu)

Unsaturation Number:0.0 .. 30.0 (Fraction:Both)

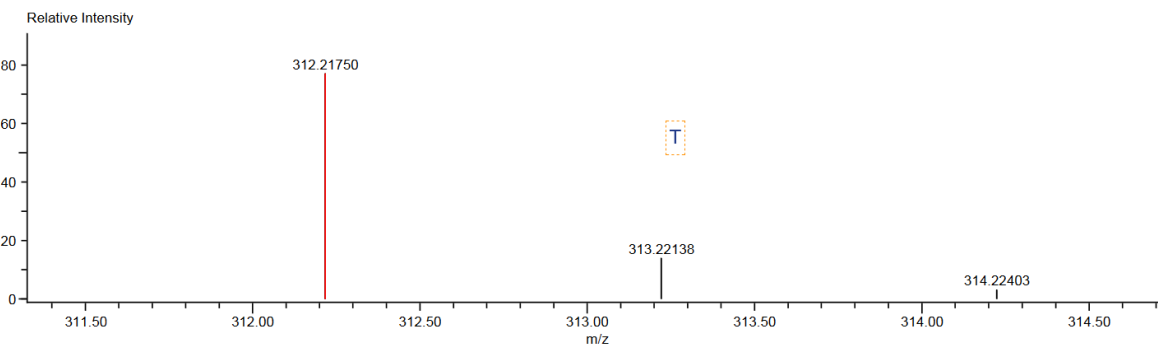

| Mass      | Intensity | Calc. Mass | Mass Difference (mmu) | Mass Difference (ppm) | Possible Formula                                                                                                     | Unsaturation Number |
|-----------|-----------|------------|-----------------------|-----------------------|----------------------------------------------------------------------------------------------------------------------|---------------------|
| 312.21750 | 408020.26 | 312.21748  | 0.02                  | 0.07                  | <sup>12</sup> C <sub>17</sub> <sup>1</sup> H <sub>30</sub> <sup>14</sup> N <sub>1</sub> <sup>16</sup> O <sub>4</sub> | 3.5                 |

S 4. ESI-HRMS of 2a

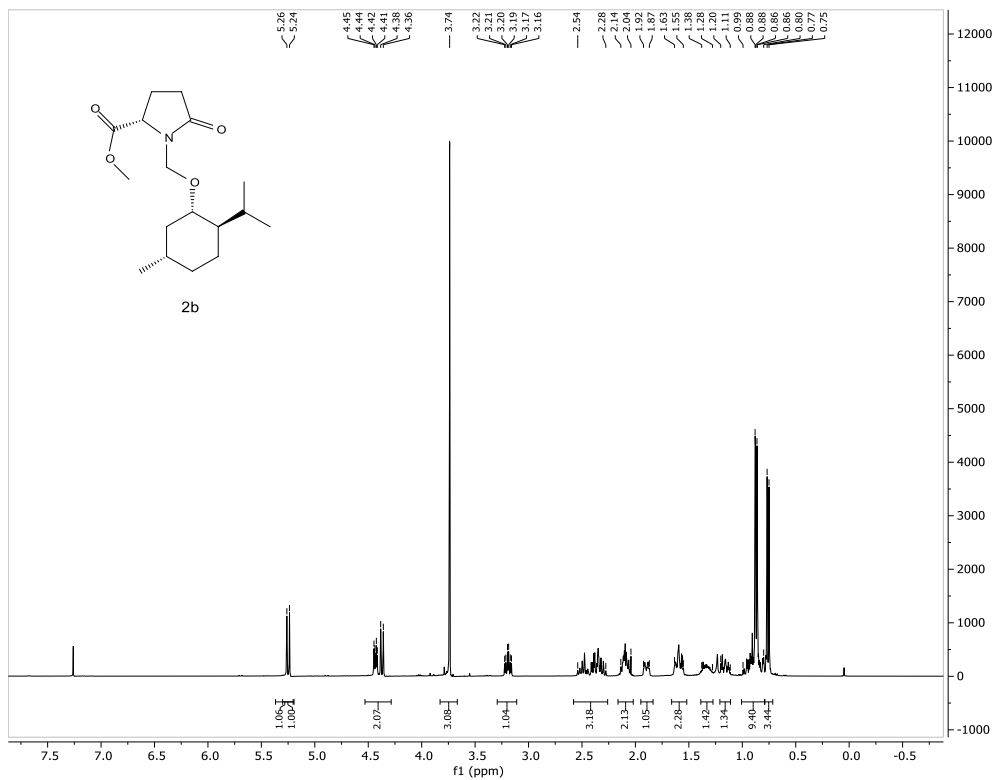

S 5. NMR-<sup>1</sup>H (400.1 MHz, CDCl<sub>3</sub>) of **2b**

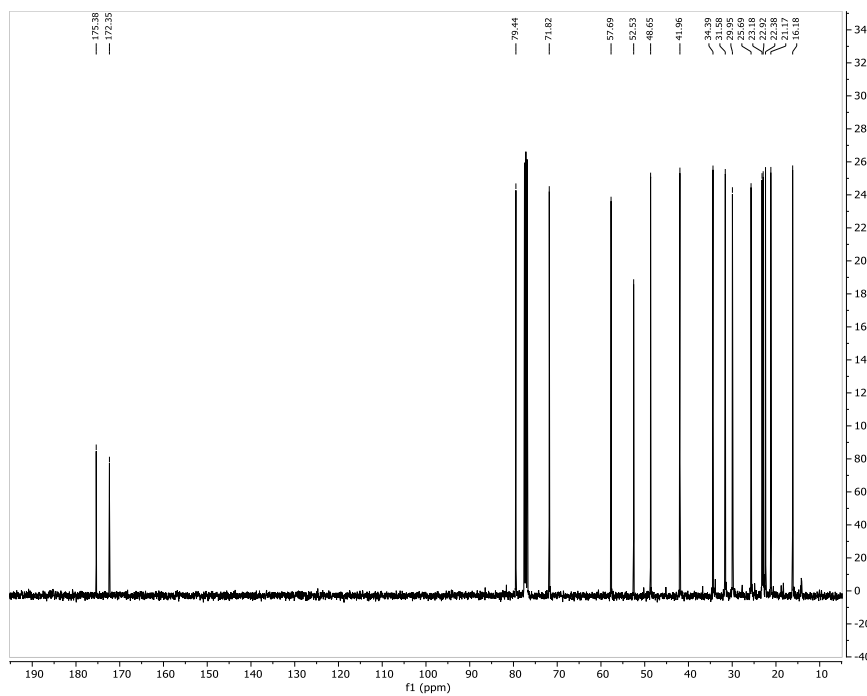

S 6. NMR-<sup>13</sup>C (100.6 MHz, CDCl<sub>3</sub>) of **2b**.

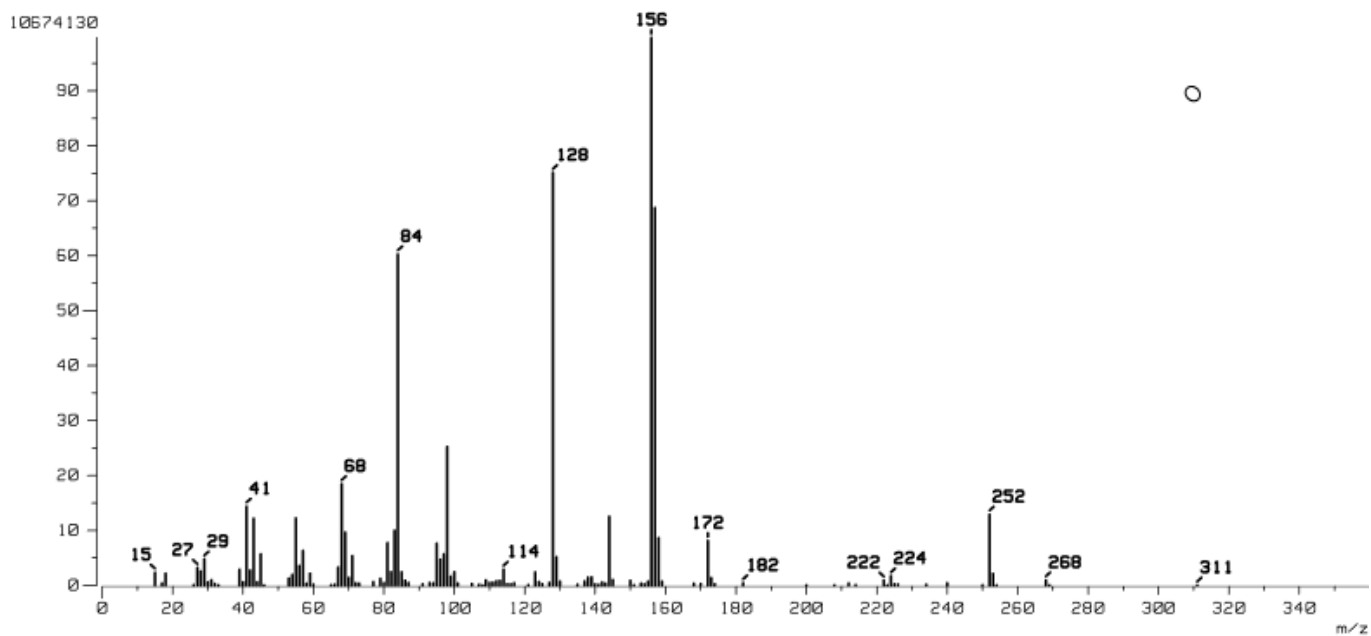

S. 7. DART<sup>+</sup> of 2b

Charge number: 1  
 Element: <sup>12</sup>C: 0 .. 17, <sup>1</sup>H: 0 .. 53, <sup>14</sup>N: 1 .. 2, <sup>16</sup>O: 1 .. 5

Tolerance: 3.00 (mmu)

Unsaturation Number: 1.0 .. 45.0 (Fraction: Both)

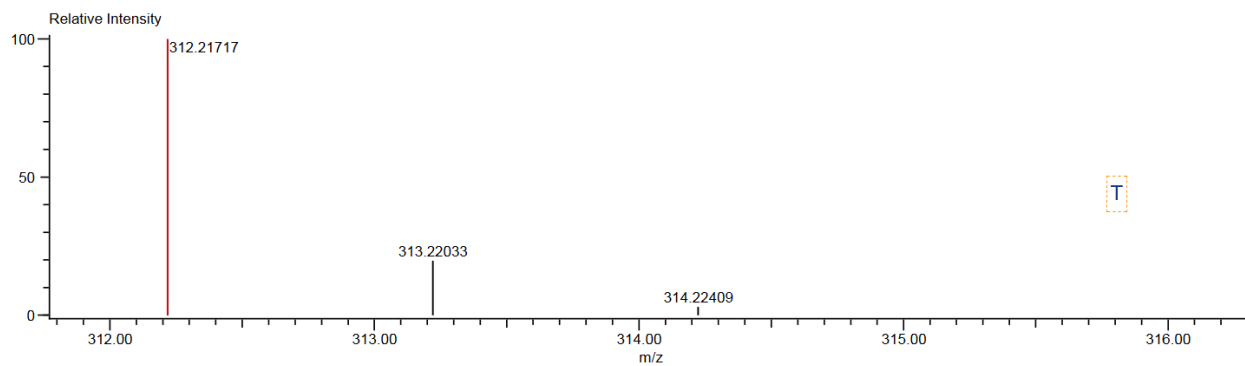

| Mass      | Intensity | Calc. Mass | Mass Difference (mmu) | Mass Difference (ppm) | Possible Formula                                                                                                     | Unsaturation Number |
|-----------|-----------|------------|-----------------------|-----------------------|----------------------------------------------------------------------------------------------------------------------|---------------------|
| 312.21717 | 472178.00 | 312.21748  | -0.31                 | -0.99                 | <sup>12</sup> C <sub>17</sub> <sup>1</sup> H <sub>30</sub> <sup>14</sup> N <sub>1</sub> <sup>16</sup> O <sub>4</sub> | 3.5                 |

S. 8. ES-HRMS<sup>+</sup> of 2b

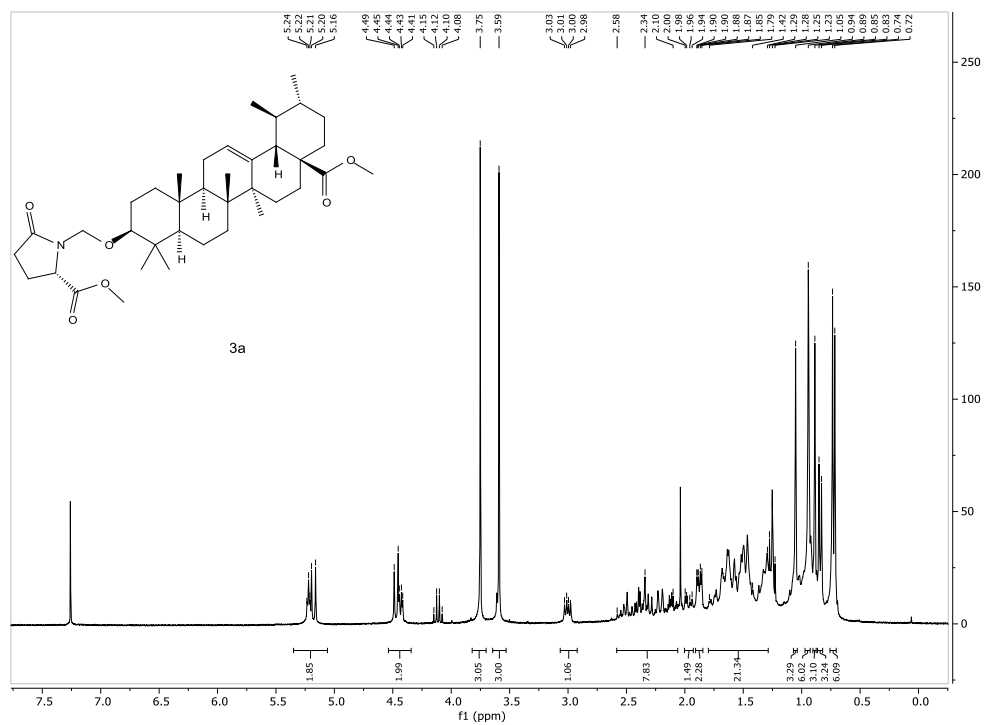

S 9.  $^1\text{H}$  NMR (300 MHz,  $\text{CDCl}_3$ ) of **3a**.

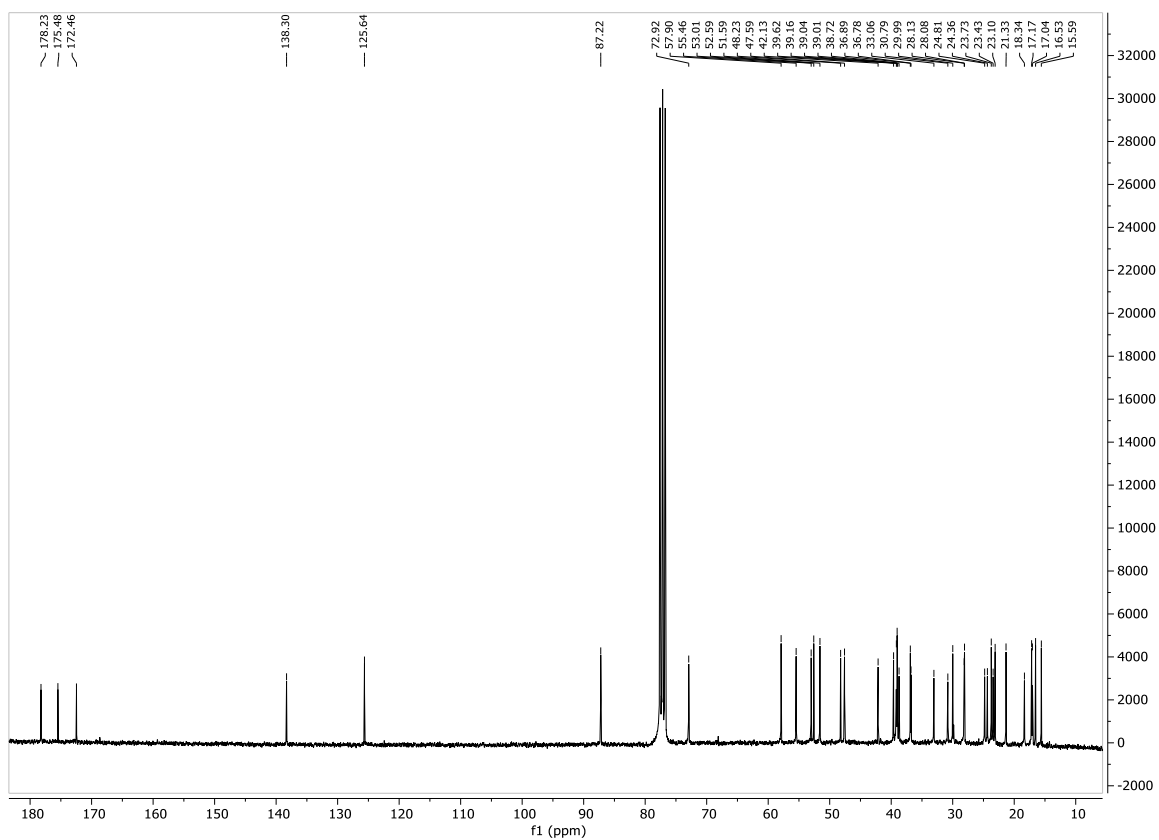

S 10.  $^{13}\text{C}$  NMR (75 MHz,  $\text{CDCl}_3$ ) of **3a**.

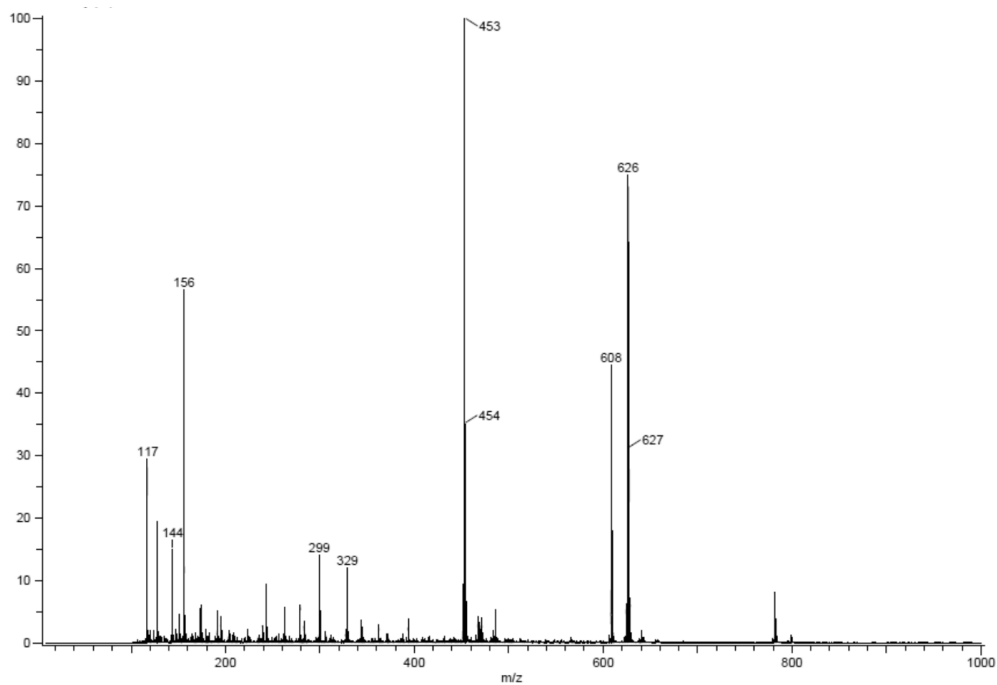

S 11. DART+ of 3a

Charge number:1      Tolerance:3.00(ppm), 5.00 .. 15.00(mmu)      Unsaturation Number:0.0 .. 60.0 (Fraction:Both)  
 Element:<sup>12</sup>C:0 .. 40, <sup>1</sup>H:0 .. 80, <sup>14</sup>N:0 .. 1, <sup>16</sup>O:0 .. 6

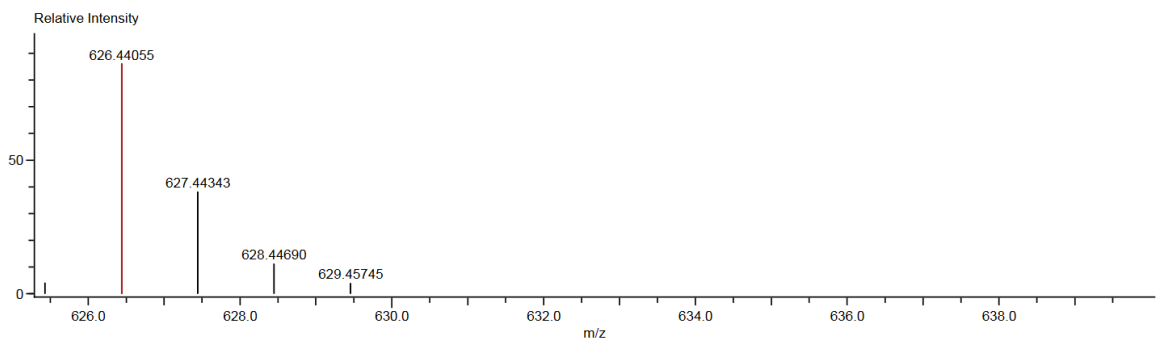

| Mass      | Intensity  | Calc. Mass | Mass Difference (mmu) | Mass Difference (ppm) | Possible Formula                                                                                                     | Unsaturation Number |
|-----------|------------|------------|-----------------------|-----------------------|----------------------------------------------------------------------------------------------------------------------|---------------------|
| 626.44055 | 2092054.95 | 626.44206  | -1.51                 | -2.41                 | <sup>12</sup> C <sub>38</sub> <sup>1</sup> H <sub>60</sub> <sup>14</sup> N <sub>1</sub> <sup>16</sup> O <sub>6</sub> | 9.5                 |

S 12. ESI-HRMS of 3 a

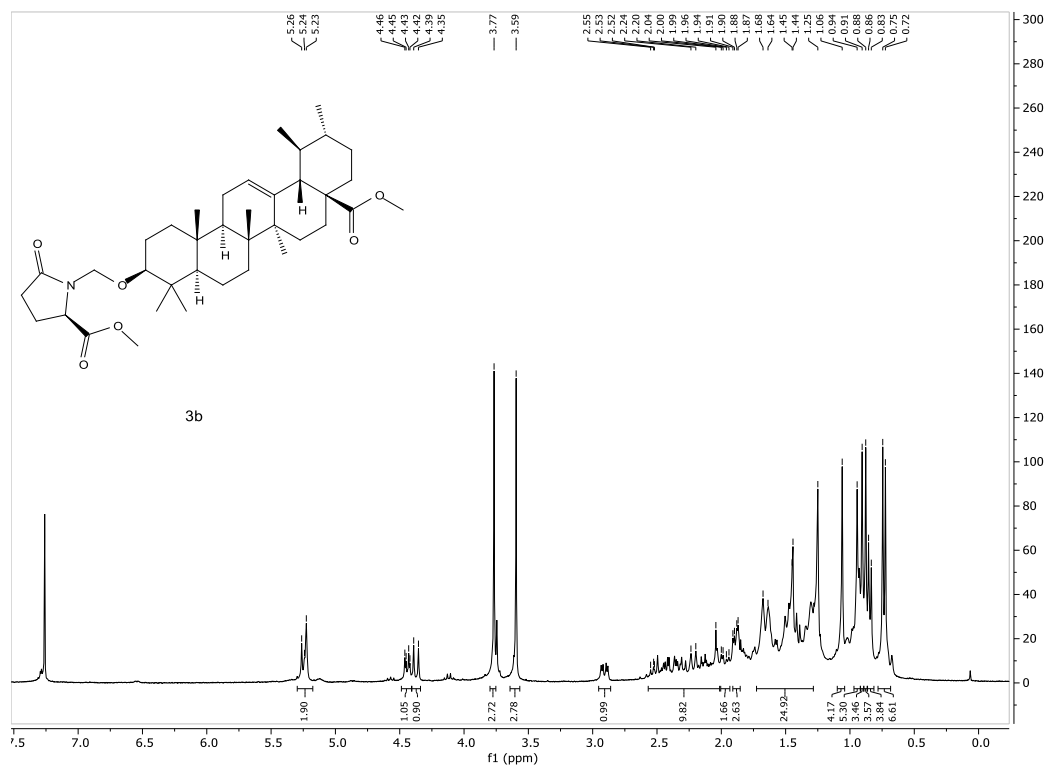

S 13. NMR-<sup>1</sup>H (300 MHz, CDCl<sub>3</sub>) of **3b**.

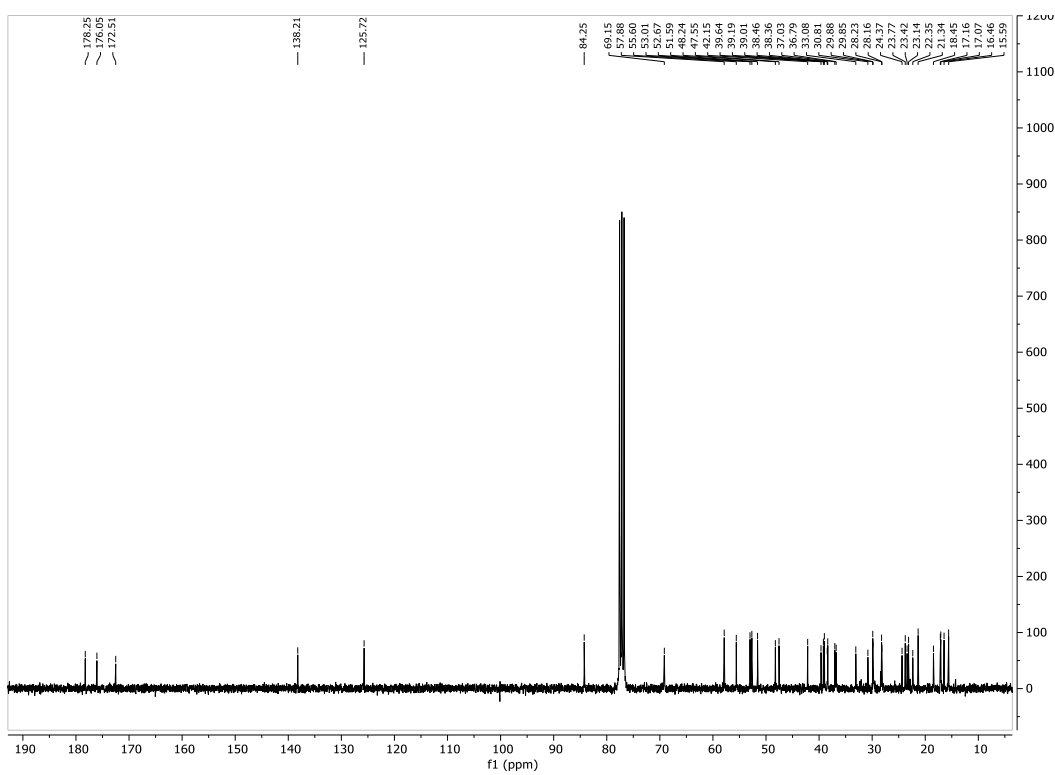

S 14. NMR-<sup>13</sup>C (75 MHz, CDCl<sub>3</sub>) of **3a**

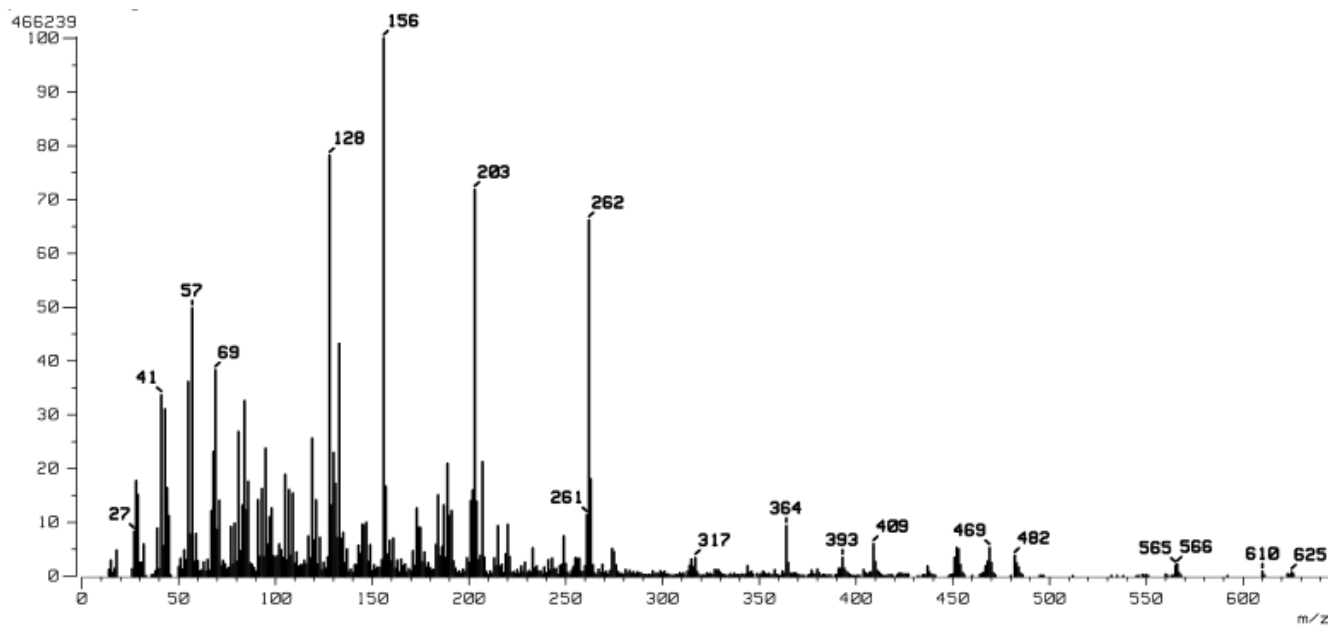

S 15. ESI-MS of 3b

Charge number:1  
 Element:<sup>12</sup>C:0 .. 40, <sup>1</sup>H:0 .. 70, <sup>14</sup>N:0 .. 2, <sup>16</sup>O:0 .. 8

Tolerance:3.00(mmu)

Unsaturation Number:0.0 .. 50.0 (Fraction:Both)

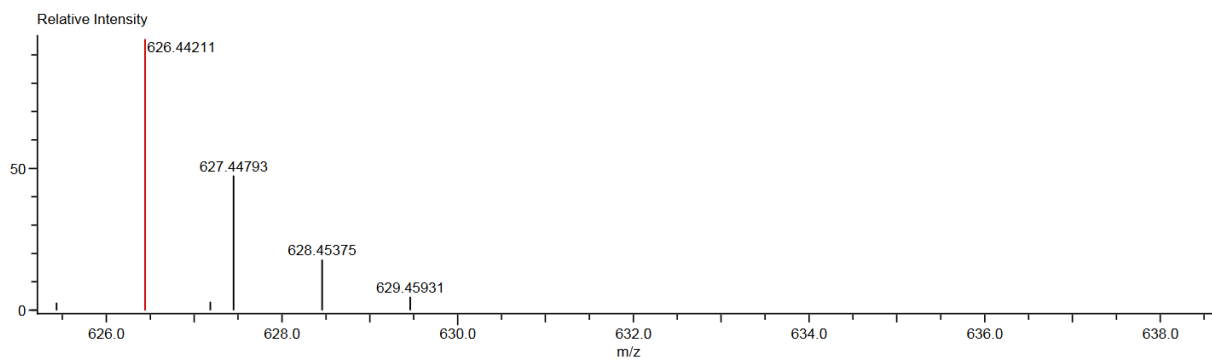

| Mass      | Intensity | Calc. Mass | Mass Difference (mmu) | Mass Difference (ppm) | Possible Formula                                                                                                     | Unsaturation Number |
|-----------|-----------|------------|-----------------------|-----------------------|----------------------------------------------------------------------------------------------------------------------|---------------------|
| 626.44211 | 13539.87  | 626.44206  | 0.05                  | 0.08                  | <sup>12</sup> C <sub>38</sub> <sup>1</sup> H <sub>60</sub> <sup>14</sup> N <sub>1</sub> <sup>16</sup> O <sub>6</sub> | 9.5                 |

S 16. ESI-HRMS of 3b



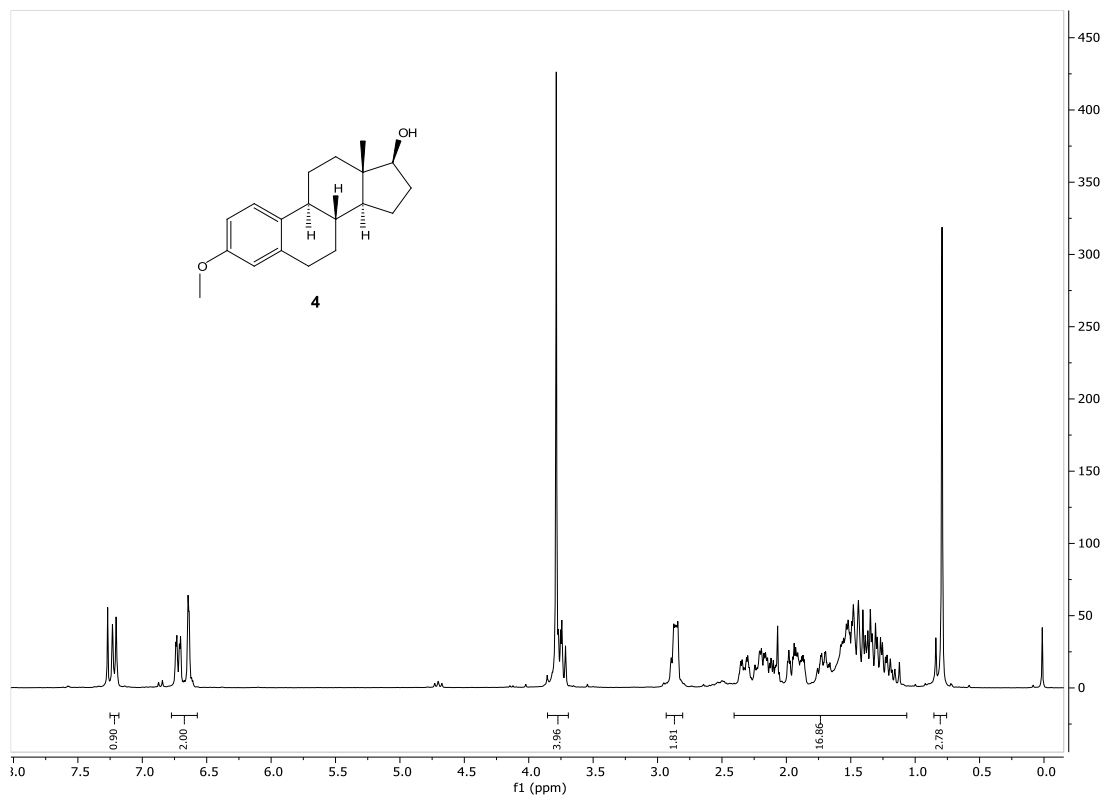

S 17. NMR-<sup>1</sup>H (300 MHz, CDCl<sub>3</sub>) of **4**

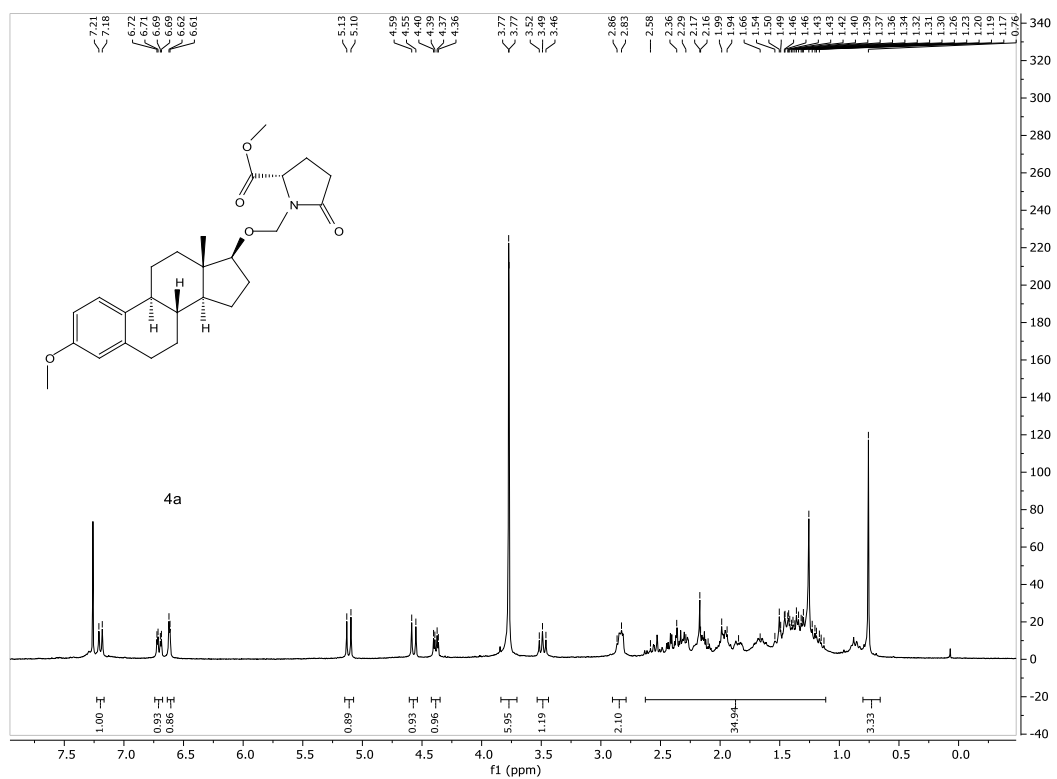

S 18. NMR-<sup>1</sup>H (300 MHz, CDCl<sub>3</sub>) of **4a**

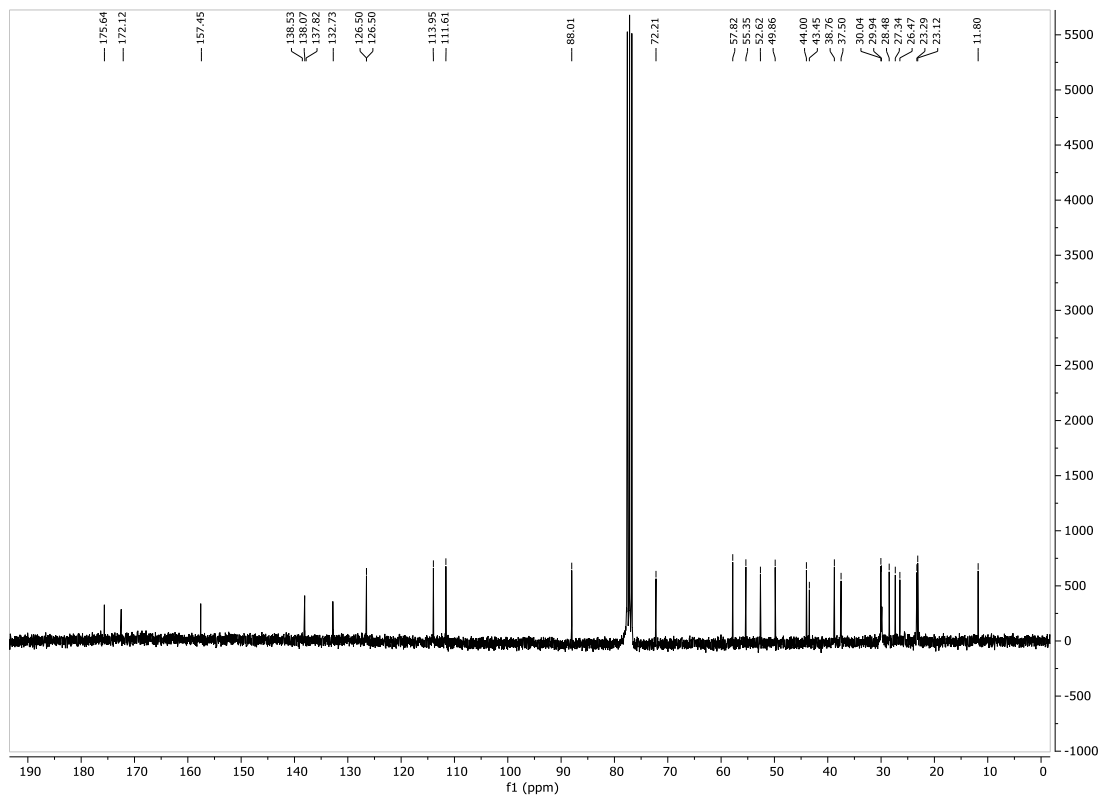

S 19. NMR- $^{13}\text{C}$  (75 MHz,  $\text{CDCl}_3$ ) of 4a.

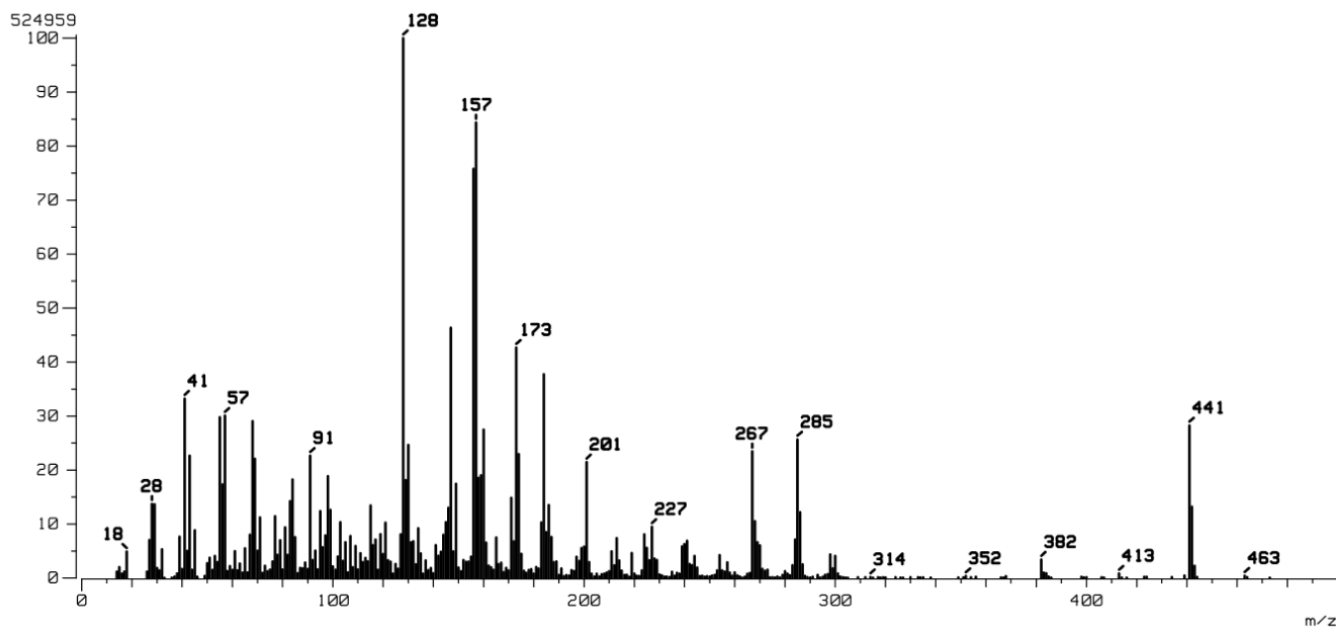

S 20. ESI-MS of 4a

Charge number:1  
Element:<sup>12</sup>C:0 .. 40, <sup>1</sup>H:0 .. 70, <sup>14</sup>N:0 .. 2, <sup>16</sup>O:0 .. 5

Tolerance:3.00(mmu)

Unsaturation Number:0.0 .. 50.0 (Fraction:Both)

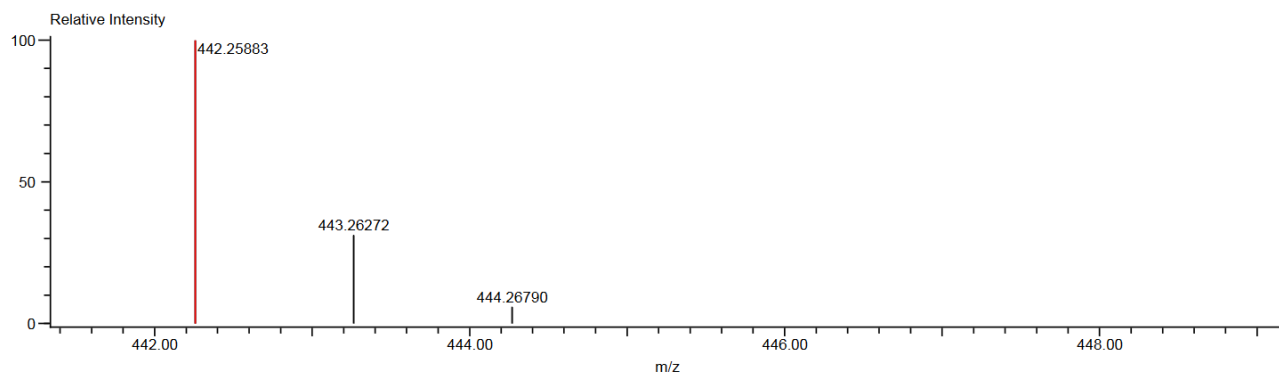

| Mass      | Intensity | Calc. Mass | Mass Difference (mmu) | Mass Difference (ppm) | Possible Formula                                                                                                     | Unsaturation Number |
|-----------|-----------|------------|-----------------------|-----------------------|----------------------------------------------------------------------------------------------------------------------|---------------------|
| 442.25883 | 338260.88 | 442.25935  | -0.52                 | -1.17                 | <sup>12</sup> C <sub>26</sub> <sup>1</sup> H <sub>36</sub> <sup>14</sup> N <sub>1</sub> <sup>16</sup> O <sub>5</sub> | 9.5                 |

S 21. ESI-HRMS of 4a.

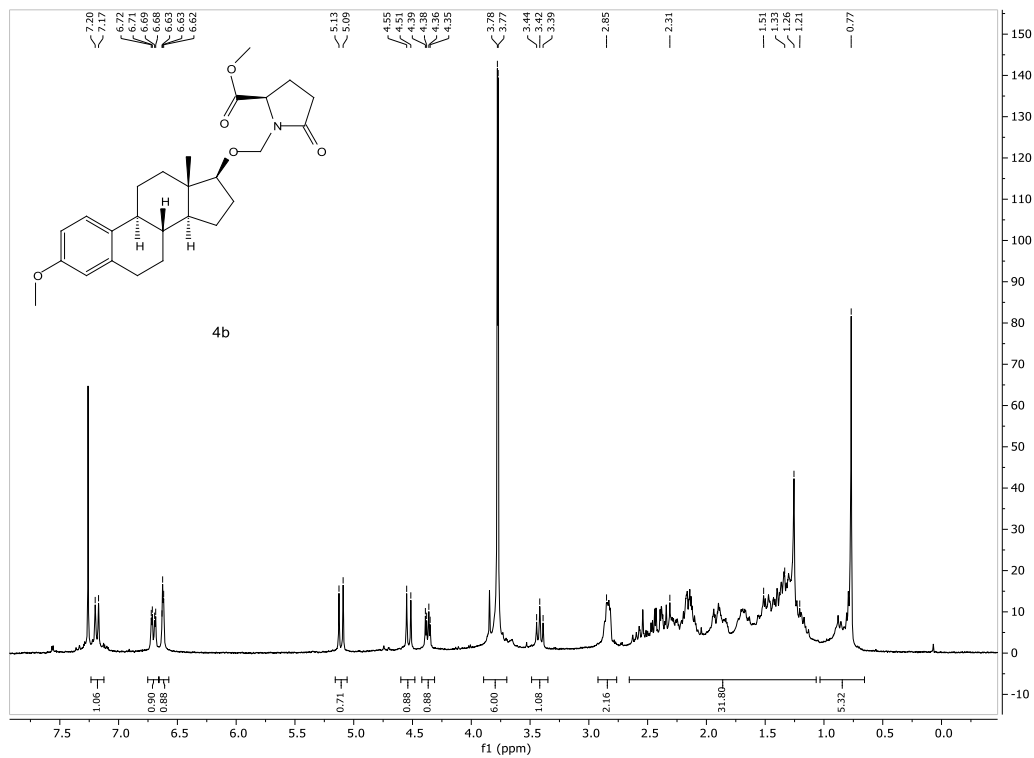

S 22. NMR-<sup>1</sup>H (300 MHz, CDCl<sub>3</sub>) of 4b.

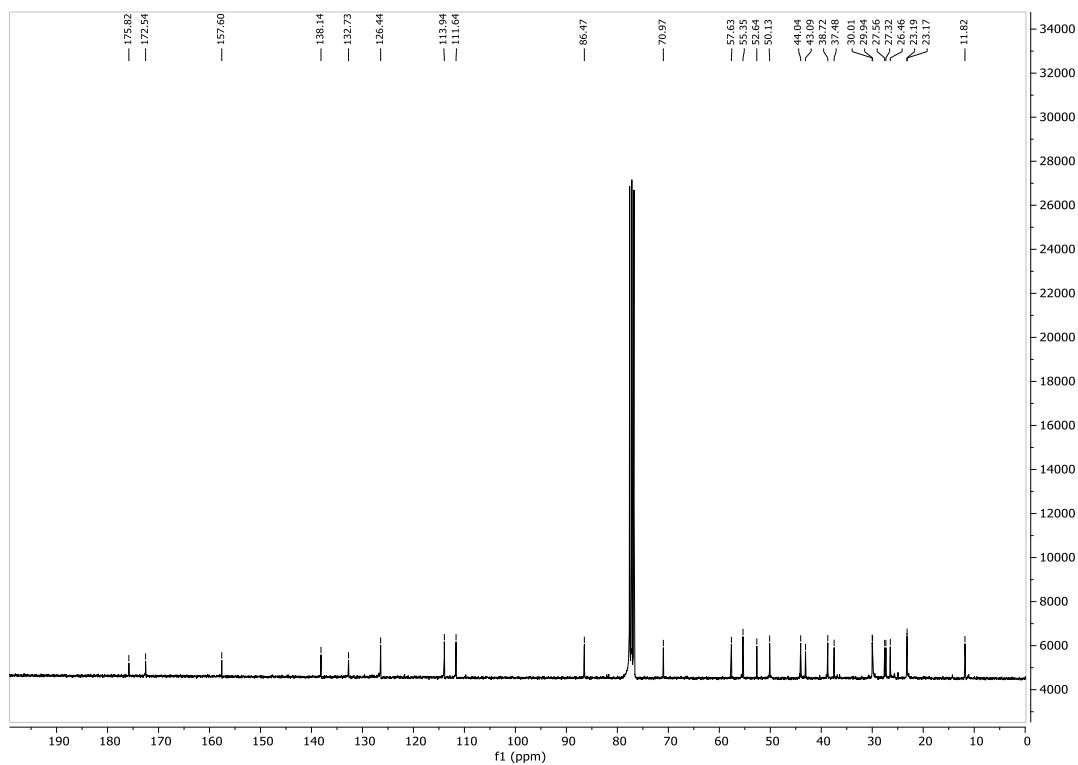

S 23. NMR-<sup>13</sup>C (75 MHz, CDCl<sub>3</sub>) of 4b.

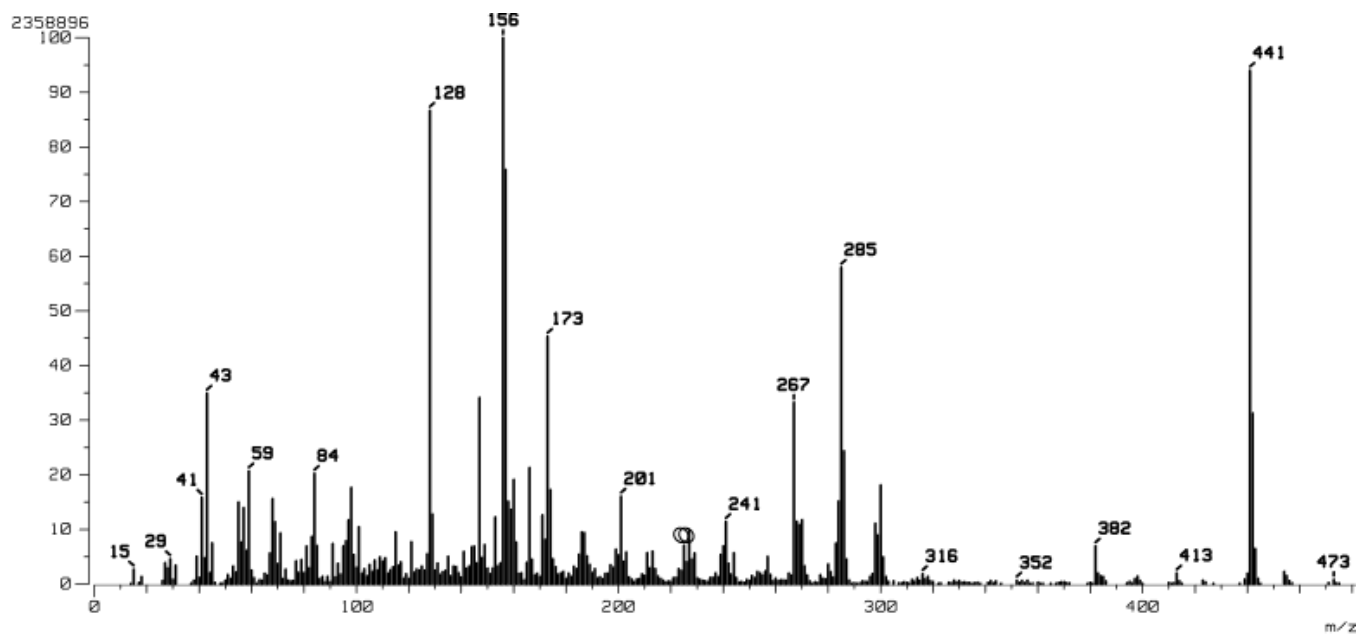

S 24. ESI-MS of 4b.

Charge number:1  
Element:<sup>12</sup>C:1 .. 26, <sup>1</sup>H:1 .. 40, <sup>14</sup>N:1 .. 2, <sup>16</sup>O:1 .. 6

Tolerance:3.00(ppm), 5.00 .. 15.00(mmu)

Unsaturation Number:0.0 .. 50.0 (Fraction:Both)

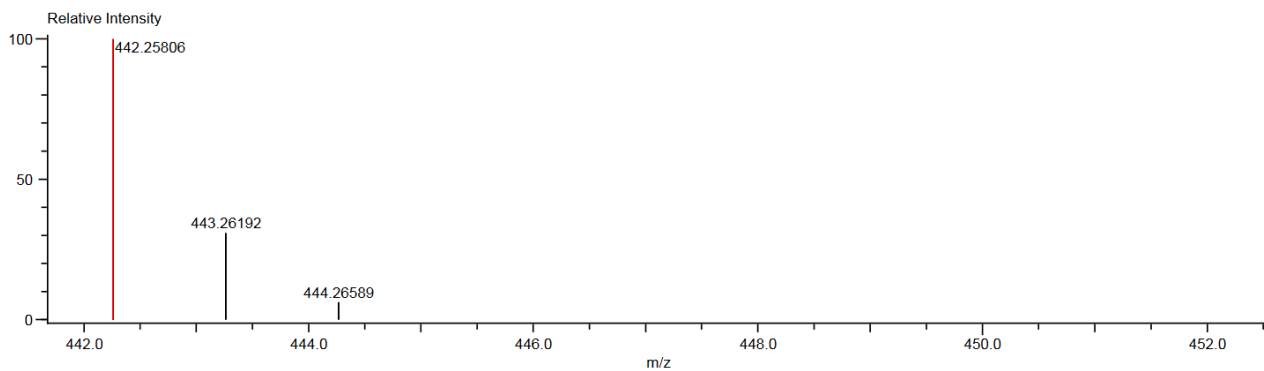

| Mass      | Intensity | Calc. Mass | Mass Difference (mmu) | Mass Difference (ppm) | Possible Formula                                                                                                     | Unsaturation Number |
|-----------|-----------|------------|-----------------------|-----------------------|----------------------------------------------------------------------------------------------------------------------|---------------------|
| 442.25806 | 249075.92 | 442.25935  | -1.29                 | -2.91                 | <sup>12</sup> C <sub>26</sub> <sup>1</sup> H <sub>36</sub> <sup>14</sup> N <sub>1</sub> <sup>16</sup> O <sub>5</sub> | 9.5                 |

S 25. ESI-HRMS of 4b.

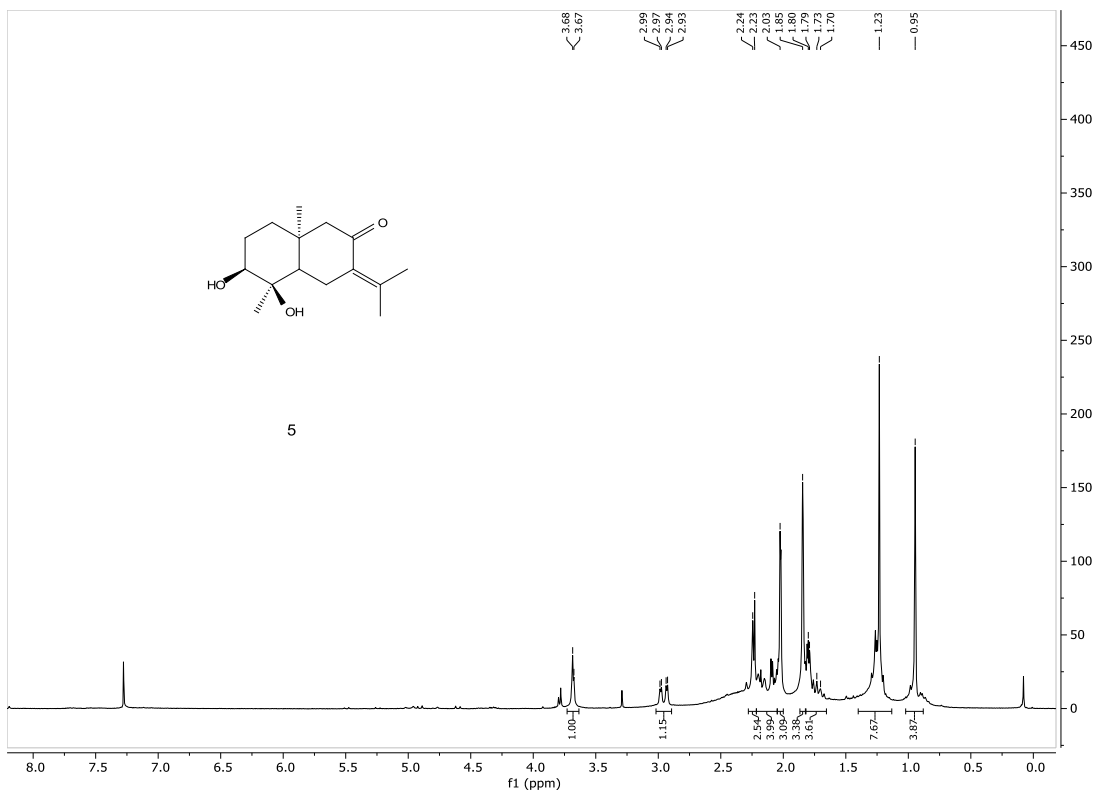

S 26. NMR-<sup>1</sup>H (300 MHz, CDCl<sub>3</sub>) of 5.

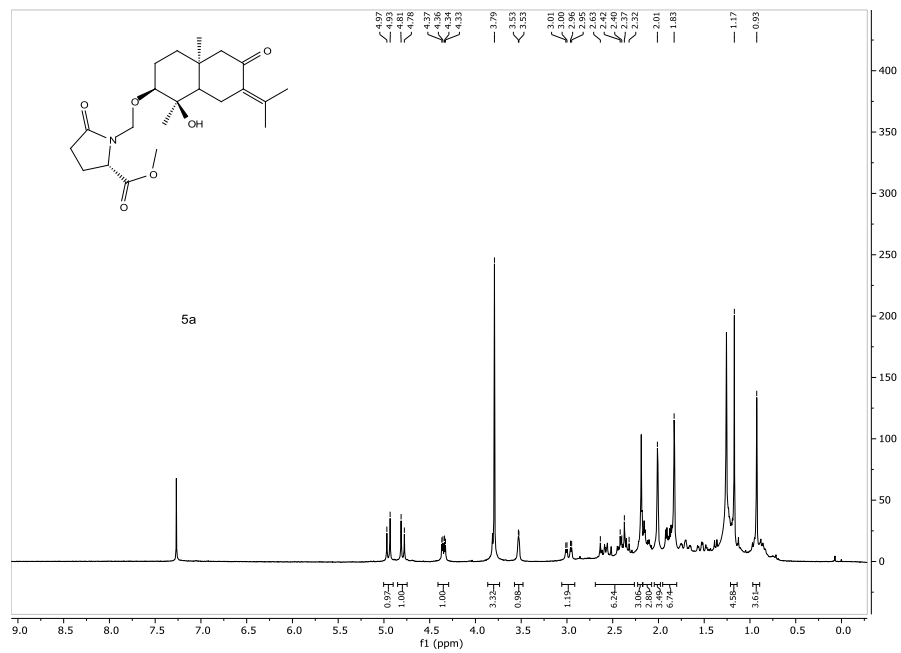

S 27. NMR-<sup>1</sup>H (300 MHz, CDCl<sub>3</sub>) of 5a.

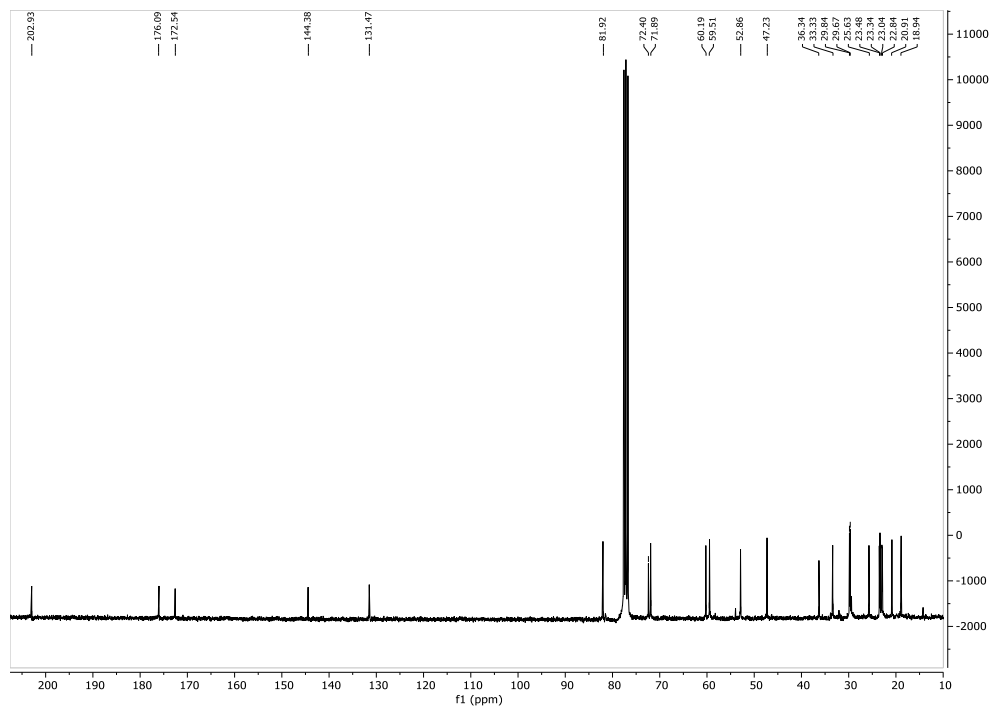

S 28. NMR-<sup>13</sup>C (75 MHz, CDCl<sub>3</sub>) of 5a

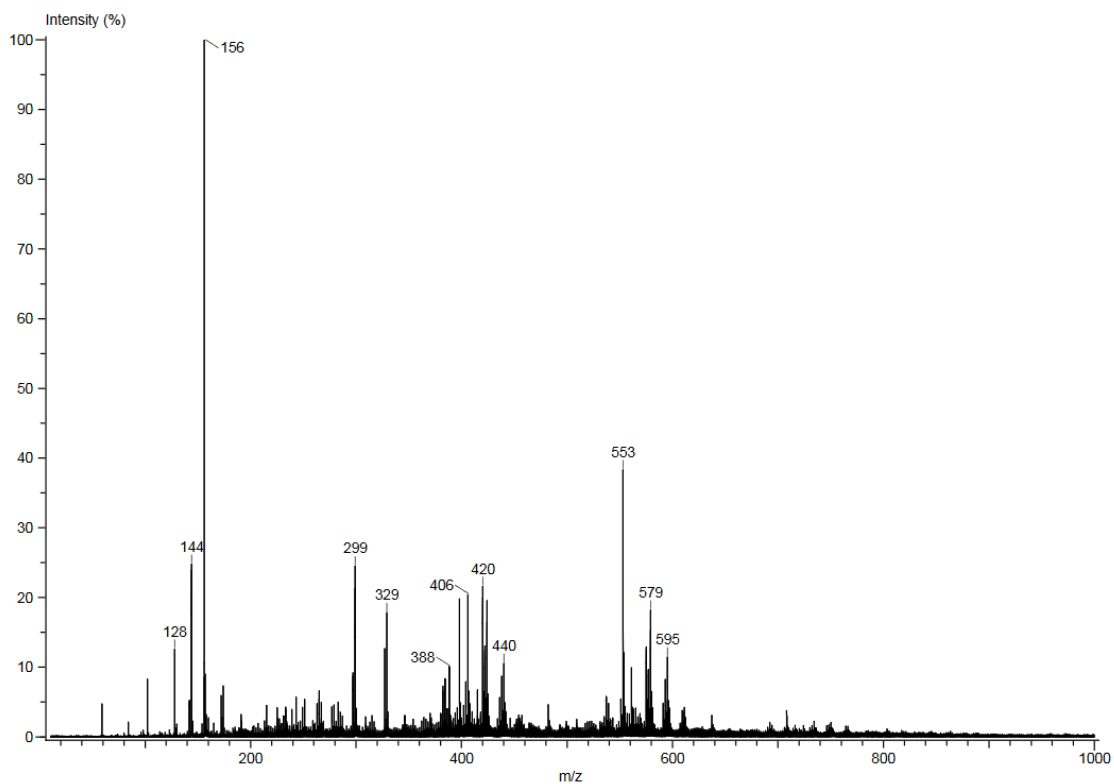

S 29. ESI-MS of 5a

Charge number:1  
 Element:<sup>12</sup>C:0 .. 40, <sup>1</sup>H:0 .. 40, <sup>14</sup>N:0 .. 1, <sup>16</sup>O:0 .. 6

Tolerance:3.00(ppm), 5.00 .. 15.00(mmu)

Unsaturation Number:0.0 .. 50.0 (Fraction:Both)

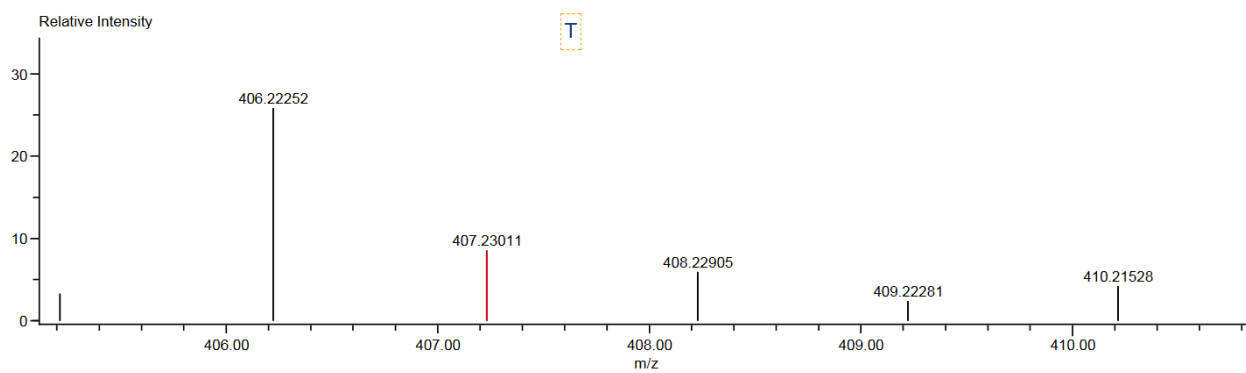

| Mass      | Intensity | Calc. Mass | Mass Difference (mmu) | Mass Difference (ppm) | Possible Formula                                                                                                     | Unsaturation Number |
|-----------|-----------|------------|-----------------------|-----------------------|----------------------------------------------------------------------------------------------------------------------|---------------------|
| 407.23011 | 3243.74   | 407.23079  | -0.68                 | -1.66                 | <sup>12</sup> C <sub>22</sub> <sup>1</sup> H <sub>33</sub> <sup>14</sup> N <sub>1</sub> <sup>16</sup> O <sub>6</sub> | 7.0                 |

S 30. ESI-HRMS of 5a

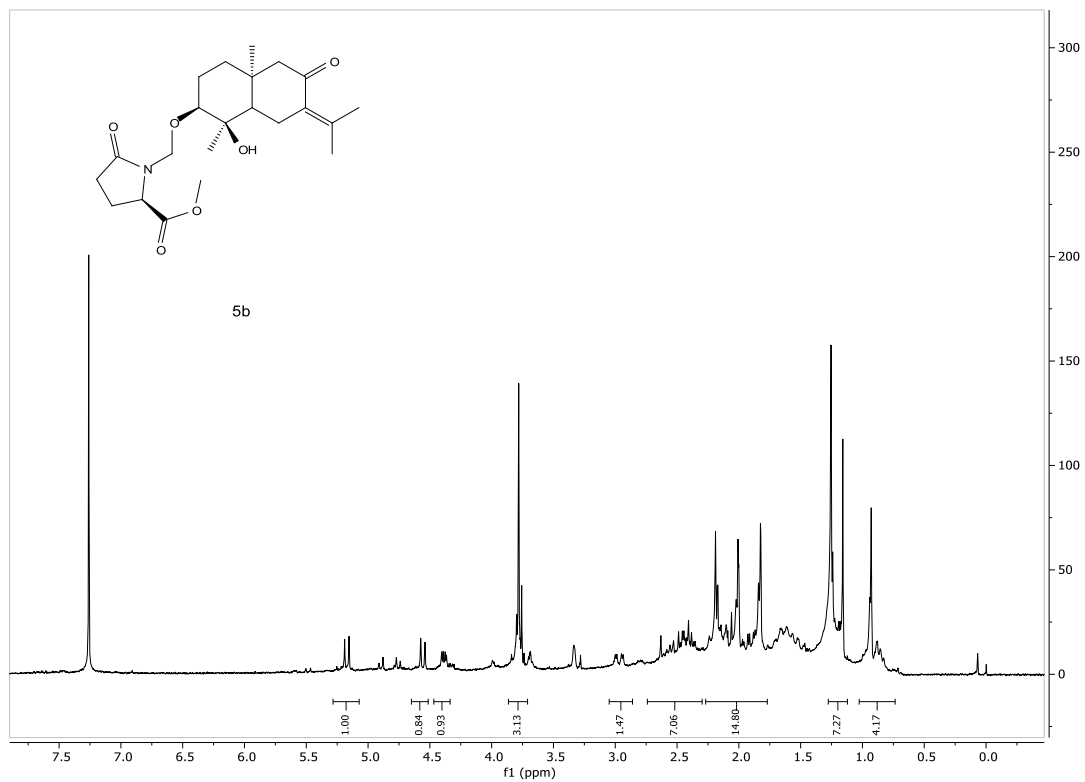

S 31. NMR-<sup>1</sup>H (300 MHz, CDCl<sub>3</sub>) of 5b.

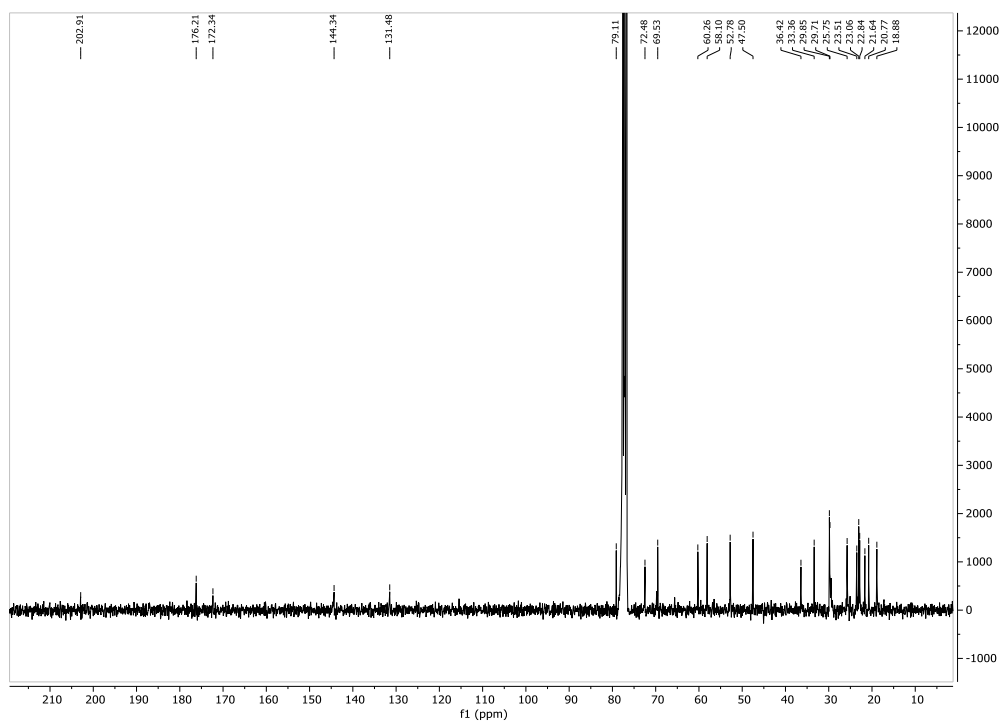

S 32. NMR-<sup>13</sup>C (75 MHz, CDCl<sub>3</sub>) of 5b.



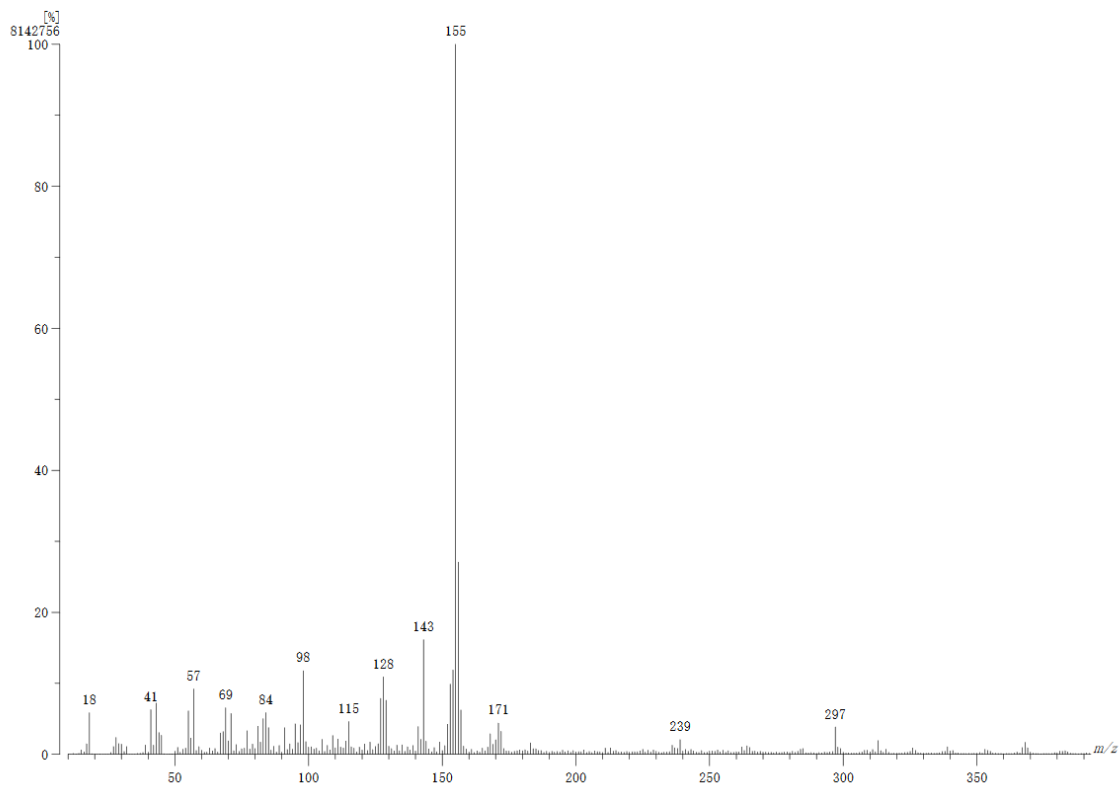

S 33. ESI-MS of 5b

Charge number:1

Tolerance:3.00(ppm), 5.00 .. 15.00(mmu)

Unsaturation Number:0.0 .. 50.0 (Fraction:Both)

Element:<sup>12</sup>C:0 .. 40, <sup>1</sup>H:0 .. 40, <sup>14</sup>N:0 .. 1, <sup>16</sup>O:0 .. 6

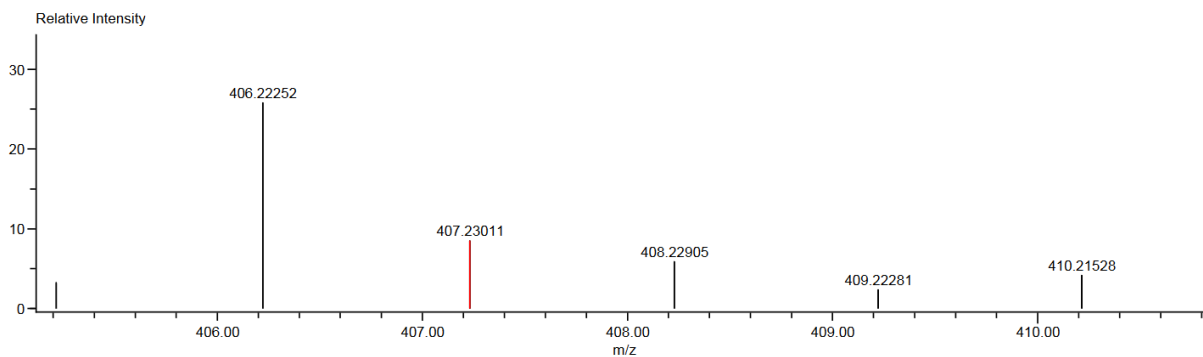

| Mass      | Intensity | Calc. Mass | Mass Difference (mmu) | Mass Difference (ppm) | Possible Formula                                                                                                     | Unsaturation Number |
|-----------|-----------|------------|-----------------------|-----------------------|----------------------------------------------------------------------------------------------------------------------|---------------------|
| 407.23011 | 3243.74   | 407.23079  | -0.68                 | -1.66                 | <sup>12</sup> C <sub>22</sub> <sup>1</sup> H <sub>33</sub> <sup>14</sup> N <sub>1</sub> <sup>16</sup> O <sub>6</sub> | 7.0                 |

S 34. ESI-HRMS of 5b.

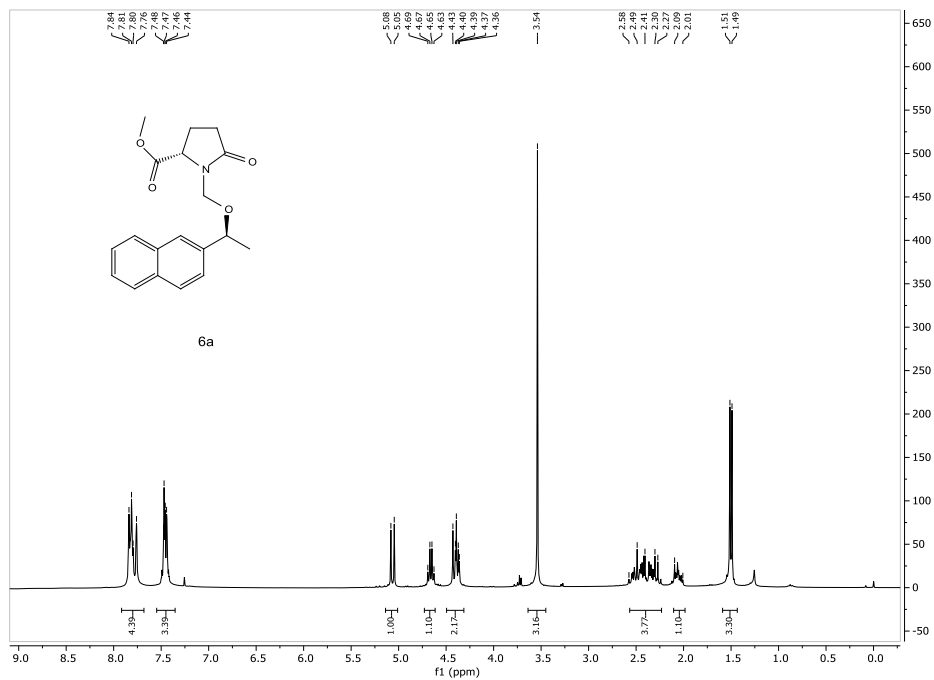

S 35. NMR- $^1\text{H}$  (300 MHz,  $\text{CDCl}_3$ ) of 6a.

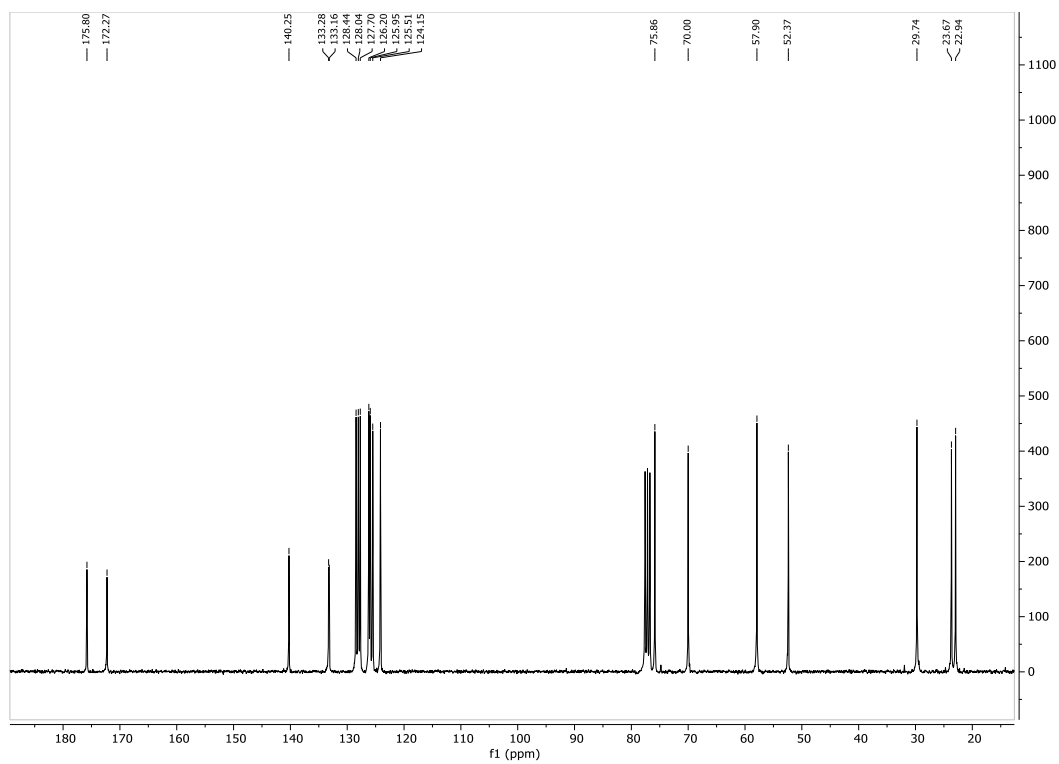

S 36. NMR- $^{13}\text{C}$  (75 MHz,  $\text{CDCl}_3$ ) of 6a.

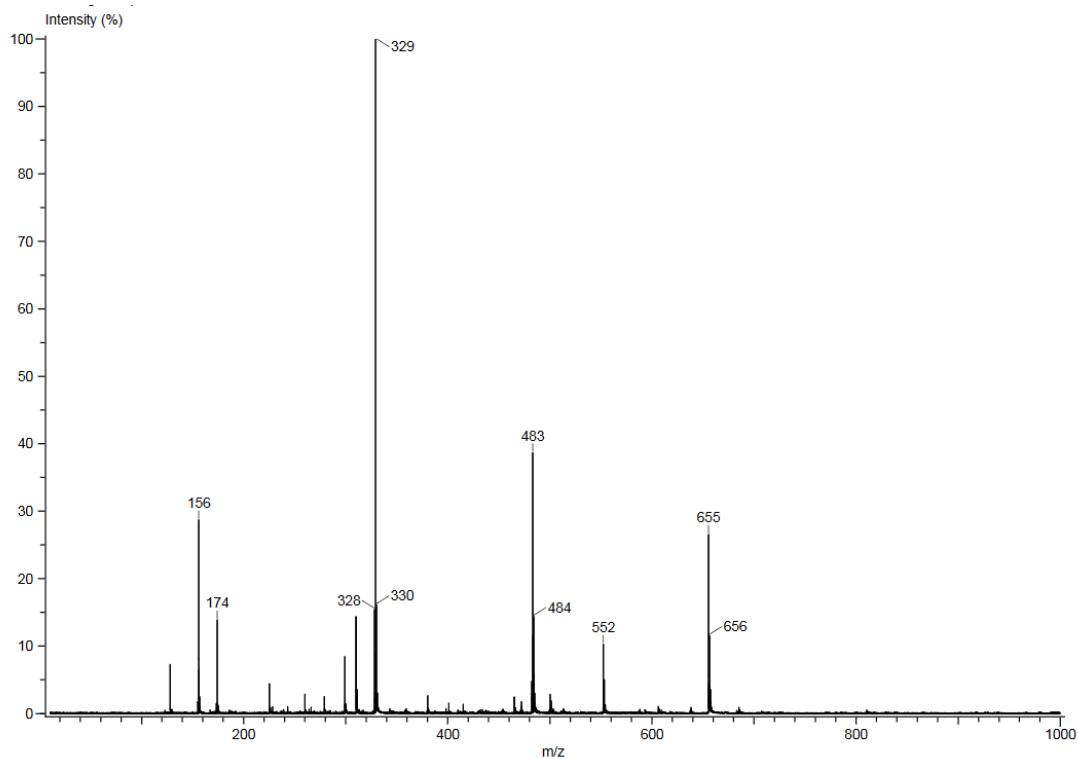

S 37. DART+ of 6a.

Charge number:1  
 Element:<sup>12</sup>C:0 .. 19, <sup>1</sup>H:0 .. 39, <sup>14</sup>N:0 .. 1, <sup>16</sup>O:4 .. 4

Tolerance:3.00(mmu)

Unsaturation Number:0.0 .. 50.0 (Fraction:Both)

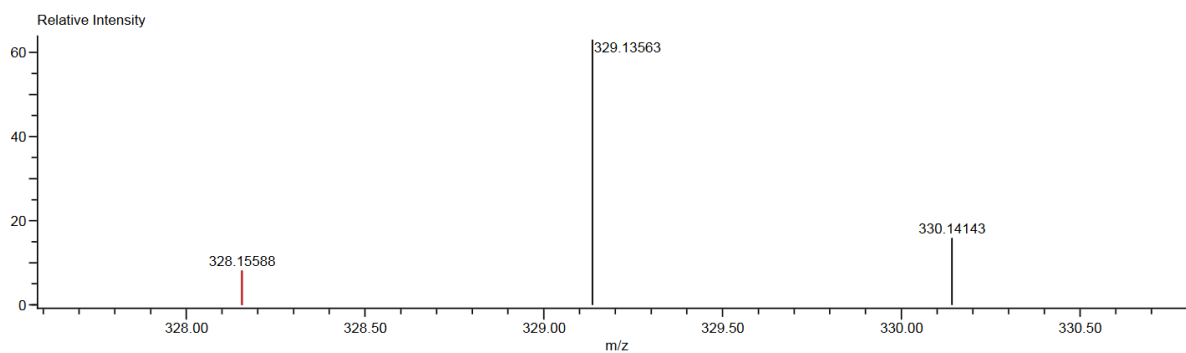

| Mass      | Intensity | Calc. Mass | Mass Difference (mmu) | Mass Difference (ppm) | Possible Formula                                                                                                     | Unsaturation Number |
|-----------|-----------|------------|-----------------------|-----------------------|----------------------------------------------------------------------------------------------------------------------|---------------------|
| 328.15588 | 4225.64   | 328.15488  | 1.00                  | 3.03                  | <sup>12</sup> C <sub>19</sub> <sup>1</sup> H <sub>22</sub> <sup>14</sup> N <sub>1</sub> <sup>16</sup> O <sub>4</sub> | 9.5                 |

T

S 38. ESI-HRMS of 6a.

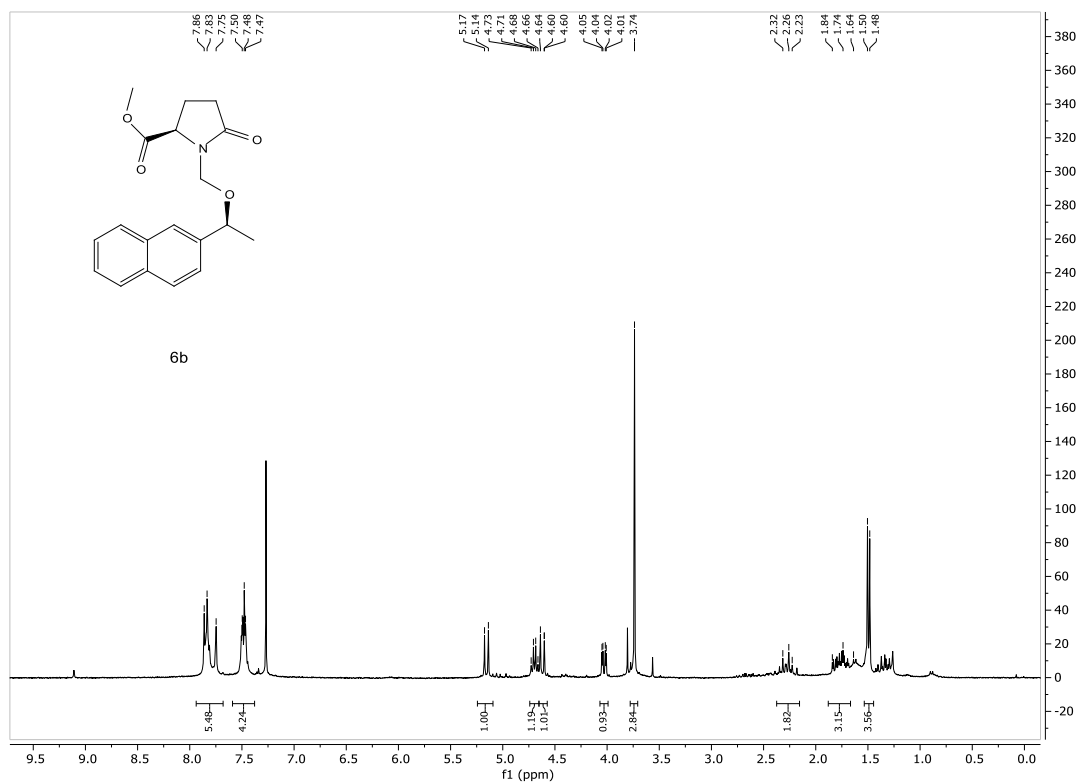

S 39. NMR-<sup>1</sup>H (300 MHz, CDCl<sub>3</sub>) of 6b.

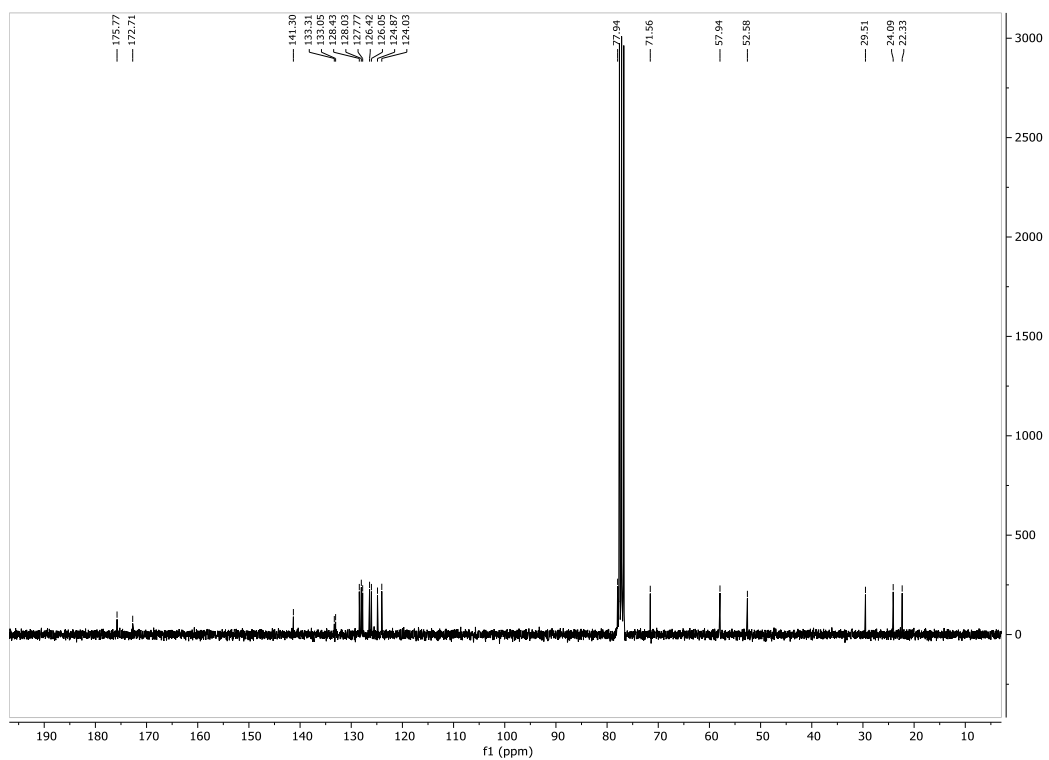

S 40. NMR-<sup>13</sup>C (75 MHz, CDCl<sub>3</sub>) of 6b.

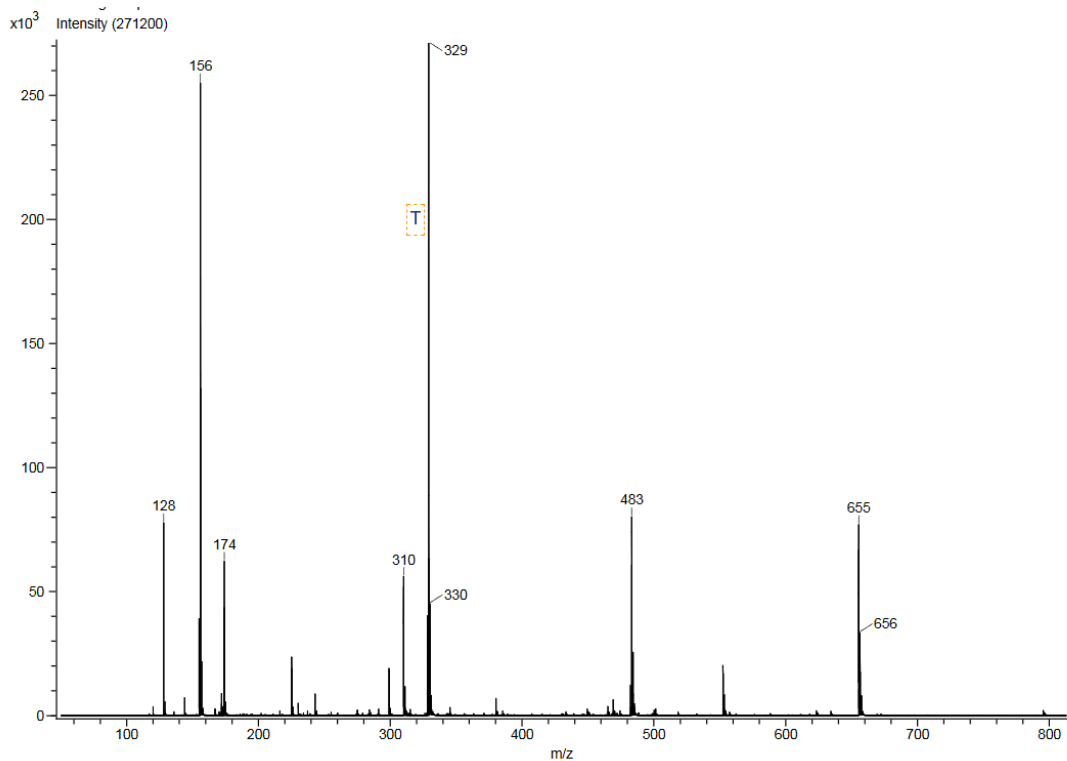

S 41. DART+ of 6b.

Charge number:1  
Element:<sup>12</sup>C:0 .. 19, <sup>1</sup>H:0 .. 39, <sup>14</sup>N:0 .. 1, <sup>16</sup>O:4 .. 4

Tolerance:3.00(mmu)

Unsaturation Number:0.0 .. 50.0 (Fraction:Both)

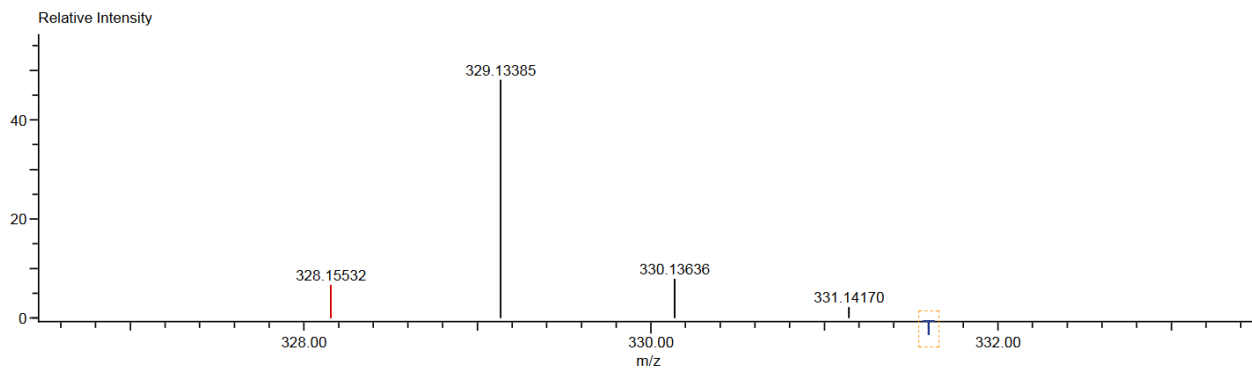

| Mass      | Intensity | Calc. Mass | Mass Difference (mmu) | Mass Difference (ppm) | Possible Formula                                                                                                     | Unsaturation Number |
|-----------|-----------|------------|-----------------------|-----------------------|----------------------------------------------------------------------------------------------------------------------|---------------------|
| 328.15532 | 22765.79  | 328.15488  | 0.44                  | 1.35                  | <sup>12</sup> C <sub>19</sub> <sup>1</sup> H <sub>22</sub> <sup>14</sup> N <sub>1</sub> <sup>16</sup> O <sub>4</sub> | 9.5                 |

S 42. ESI-HRMS of 6b.

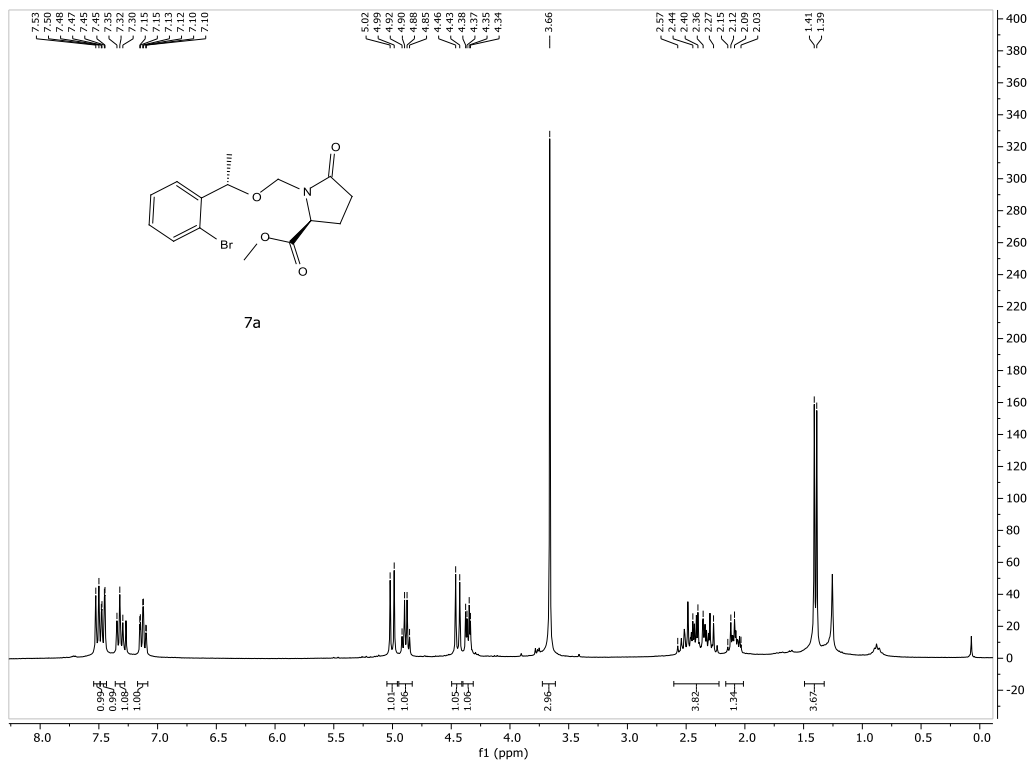

S 43. NMR-<sup>1</sup>H (300 MHz, CDCl<sub>3</sub>) of 7a.

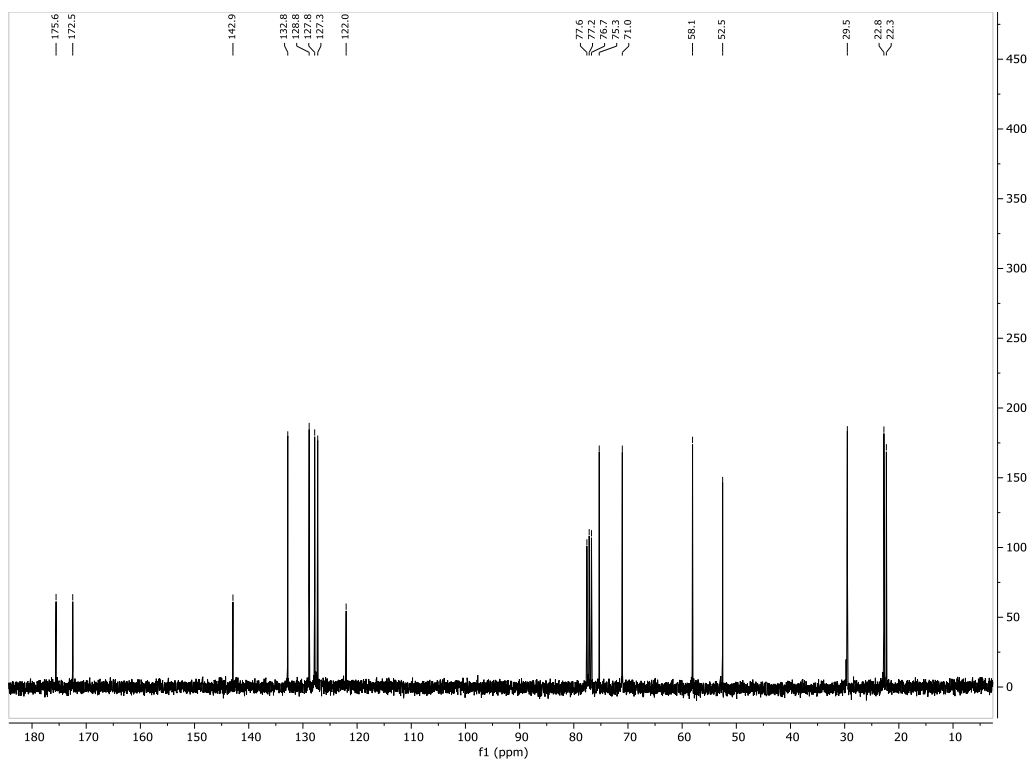

S 44. NMR-<sup>13</sup>C (75 MHz, CDCl<sub>3</sub>) of 7a.

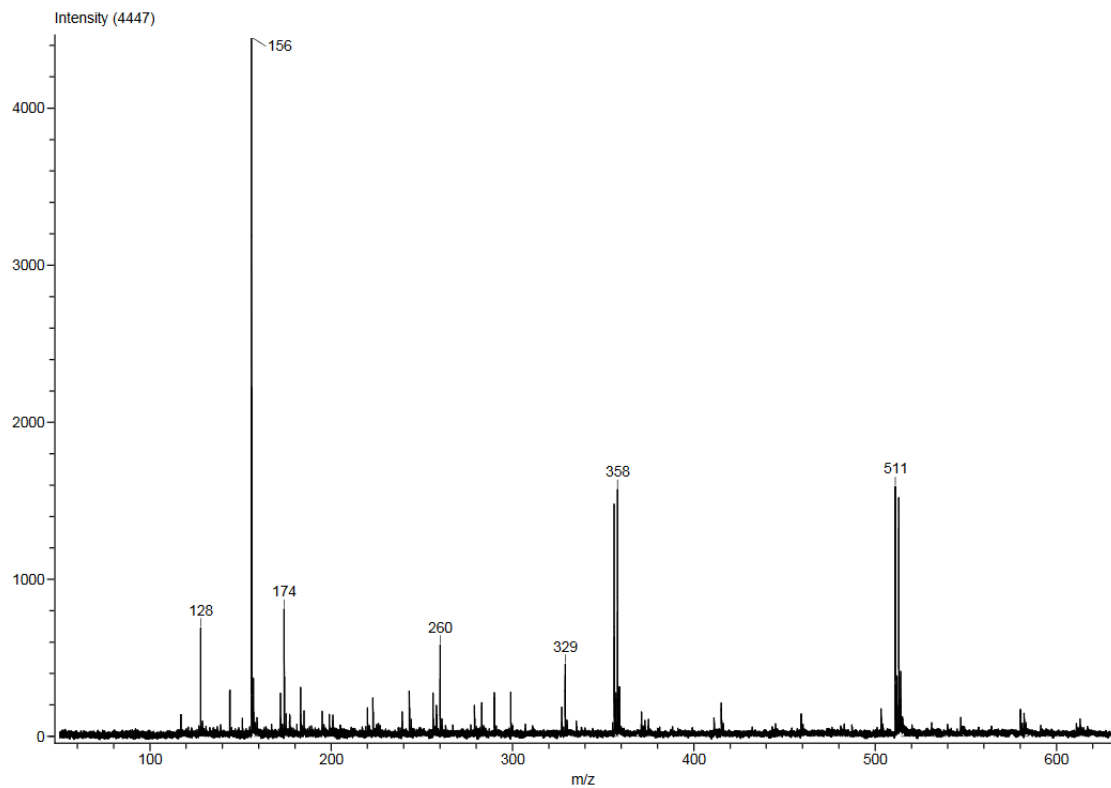

S 45. DART+ of 7a

Charge number:1 Tolerance:3.00(mmu) Unsaturation Number:0.0 .. 100.0 (Fraction:Both)  
 Element:<sup>12</sup>C:1 .. 15, <sup>1</sup>H:0 .. 30, <sup>79</sup>Br:0 .. 1, <sup>81</sup>Br:0 .. 1, <sup>14</sup>N:1 .. 1, <sup>16</sup>O:0 .. 4

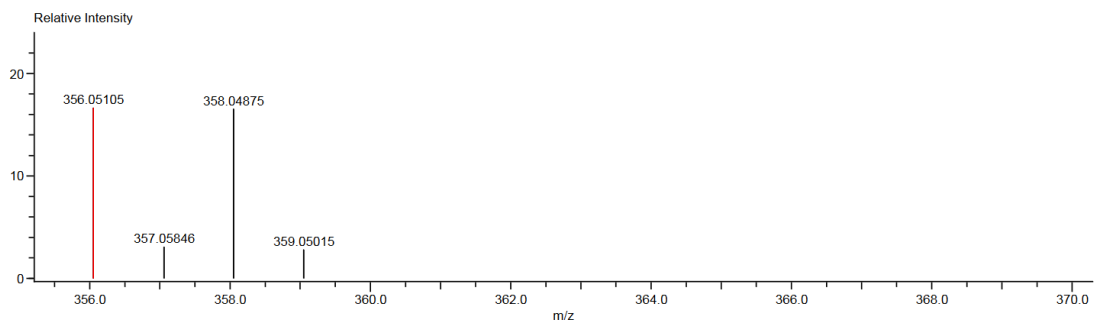

| Mass      | Intensity | Calc. Mass | Mass Difference (mmu) | Mass Difference (ppm) | Possible Formula                                                                                                                                   | Unsaturation Number |
|-----------|-----------|------------|-----------------------|-----------------------|----------------------------------------------------------------------------------------------------------------------------------------------------|---------------------|
| 356.05105 | 3358.29   | 356.04975  | 1.31                  | 3.67                  | <sup>12</sup> C <sub>15</sub> <sup>1</sup> H <sub>19</sub> <sup>79</sup> Br <sub>1</sub> <sup>14</sup> N <sub>1</sub> <sup>16</sup> O <sub>4</sub> | 6.5                 |

S 46. ESI-HRMS of 7a

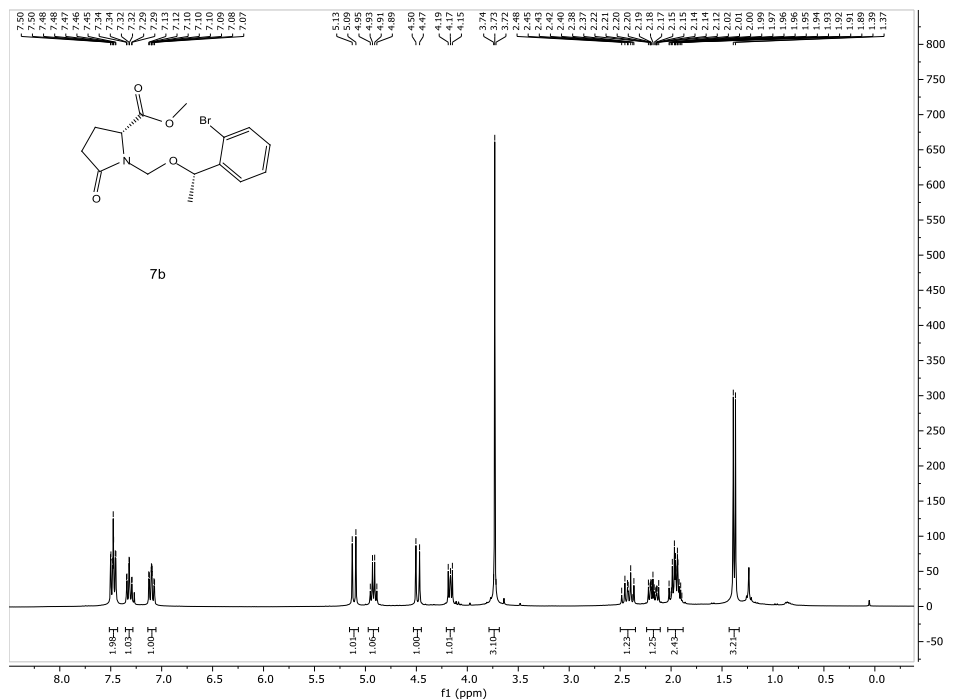

S 47. NMR-<sup>1</sup>H (300 MHz, CDCl<sub>3</sub>) of **7b**.

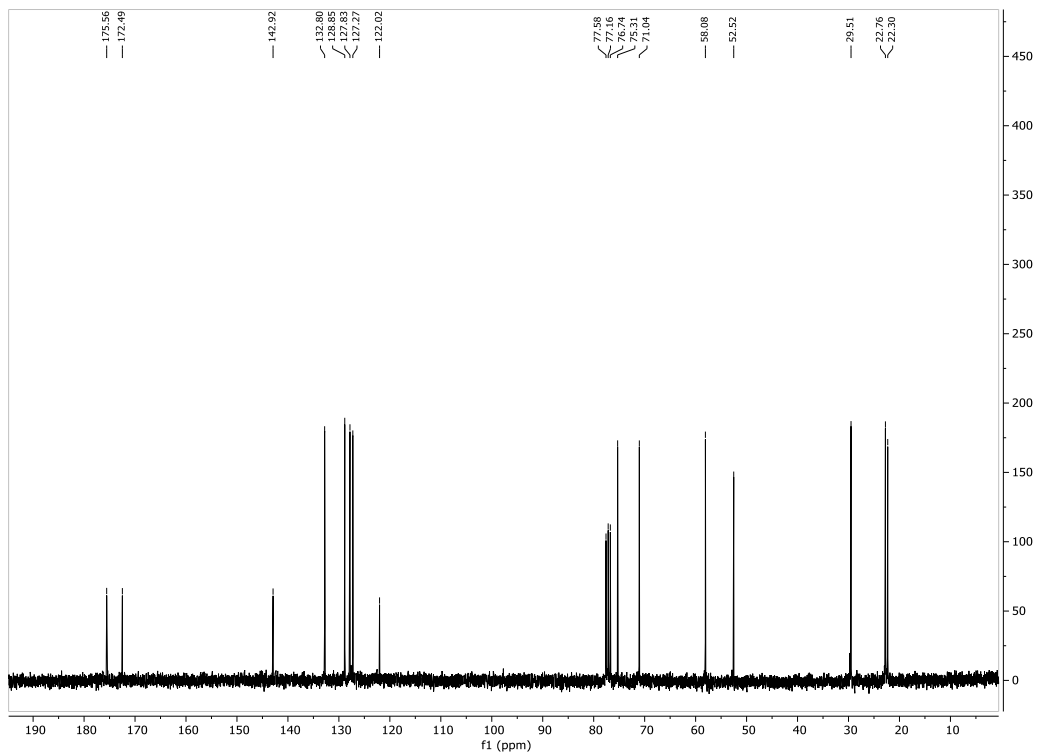

S 48. NMR-<sup>13</sup>C (75 MHz, CDCl<sub>3</sub>) of **7b**.



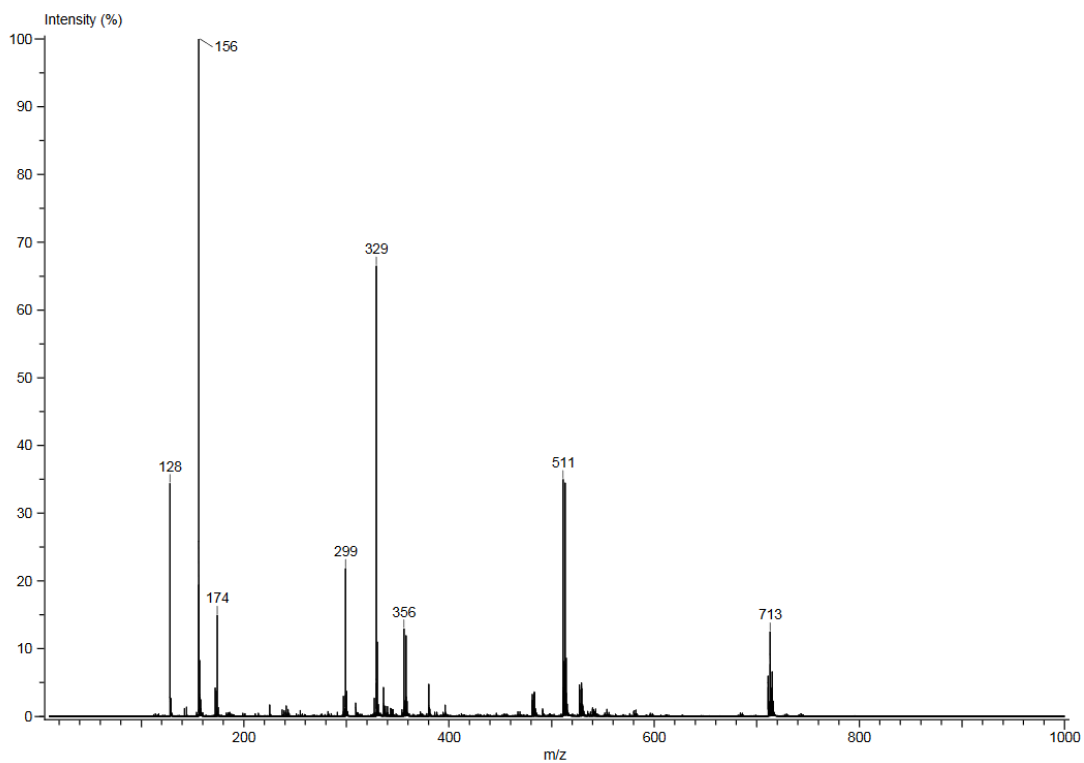

S 49. DART+ of 7b.

Charge number:1  
 Element:<sup>12</sup>C:1 .. 15, <sup>1</sup>H:0 .. 20, <sup>79</sup>Br:0 .. 1, <sup>81</sup>Br:0 .. 1, <sup>14</sup>N:0 .. 1, <sup>16</sup>O:0 .. 4

Tolerance:5.00(mmu)

Unsaturation Number:0.0 .. 100.0 (Fraction:Both)

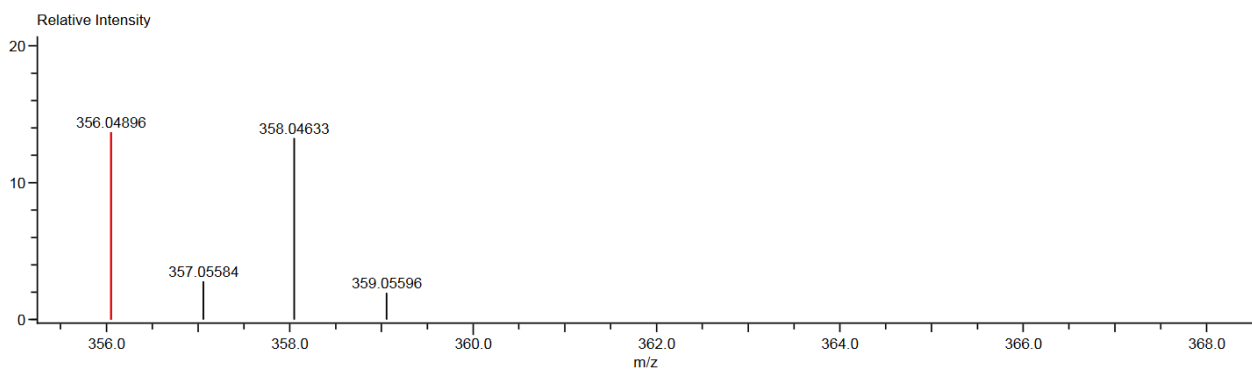

| Mass      | Intensity | Calc. Mass | Mass Difference (mmu) | Mass Difference (ppm) | Possible Formula                                                                                                                                   | Unsaturation Number |
|-----------|-----------|------------|-----------------------|-----------------------|----------------------------------------------------------------------------------------------------------------------------------------------------|---------------------|
| 356.04896 | 6729.57   | 356.04975  | -0.78                 | -2.20                 | <sup>12</sup> C <sub>15</sub> <sup>1</sup> H <sub>19</sub> <sup>79</sup> Br <sub>1</sub> <sup>14</sup> N <sub>1</sub> <sup>16</sup> O <sub>4</sub> | 6.5                 |

S 50. ESI-HRMS of 7b.

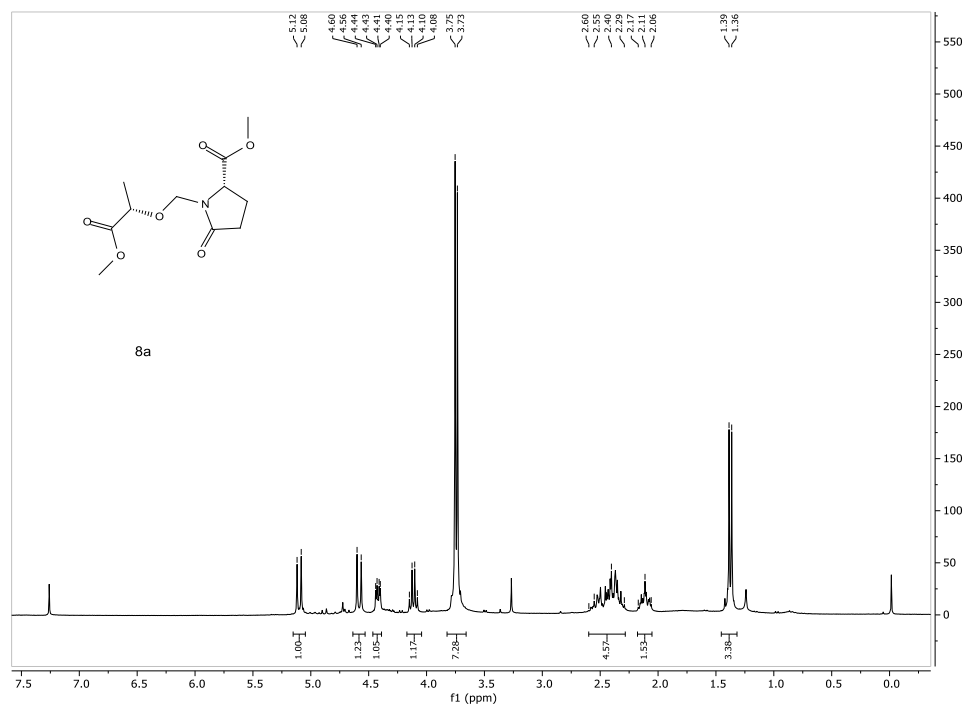

S 51. NMR-<sup>1</sup>H (300 MHz, CDCl<sub>3</sub>) of 8a

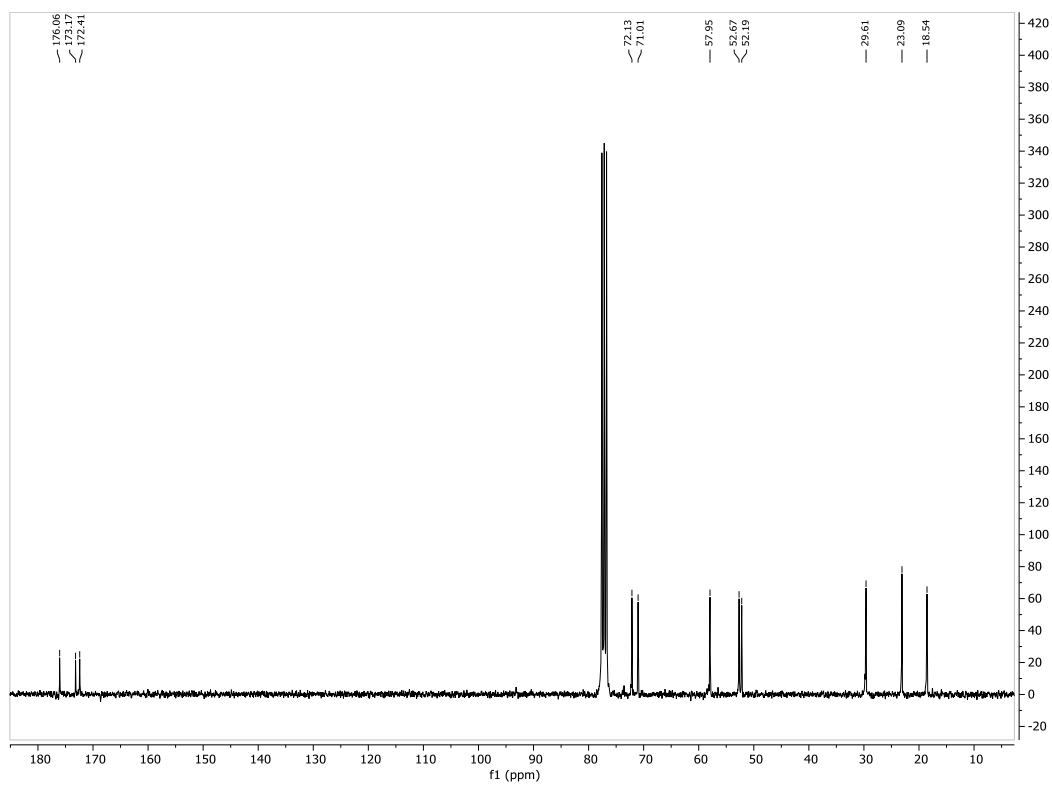

S 52. NMR-<sup>13</sup>C (75 MHz, CDCl<sub>3</sub>) of 8a.

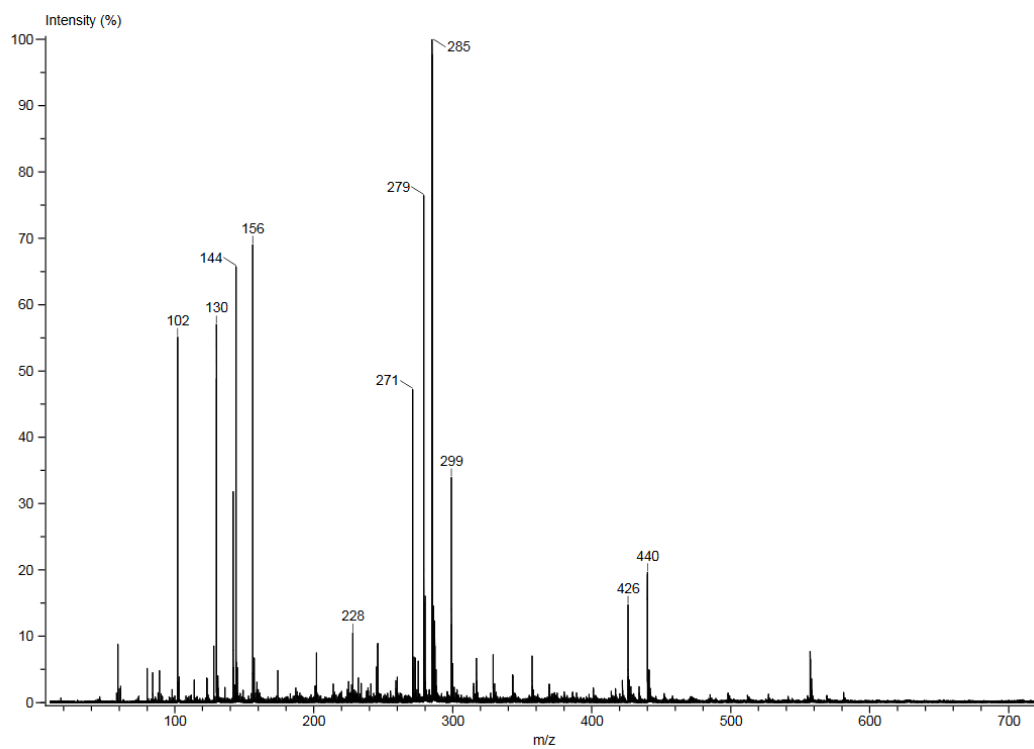

S 53. ESI-MS of 8a.

Charge number:1

Tolerance:3.00(ppm), 5.00 .. 15.00(mmu)

Unsaturation Number:0.0 .. 50.0 (Fraction:Both)

Element:<sup>12</sup>C:0 .. 11, <sup>1</sup>H:0 .. 40, <sup>14</sup>N:0 .. 1, <sup>16</sup>O:0 .. 6

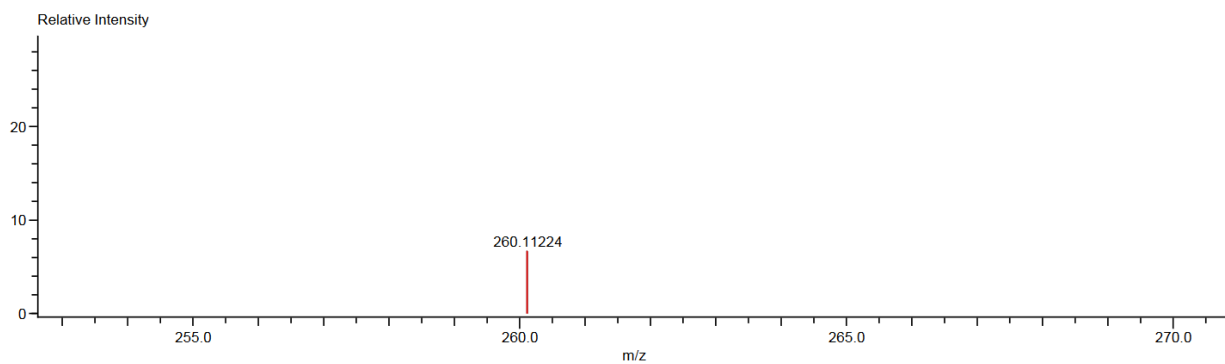

| Mass      | Intensity | Calc. Mass | Mass Difference (mmu) | Mass Difference (ppm) | Possible Formula                                                                                                     | Unsaturation Number |
|-----------|-----------|------------|-----------------------|-----------------------|----------------------------------------------------------------------------------------------------------------------|---------------------|
| 260.11224 | 5096.69   | 260.11341  | -1.17                 | -4.52                 | <sup>12</sup> C <sub>11</sub> <sup>1</sup> H <sub>18</sub> <sup>14</sup> N <sub>1</sub> <sup>16</sup> O <sub>6</sub> | 3.5                 |

S 54. ESI-HRMS of 8a

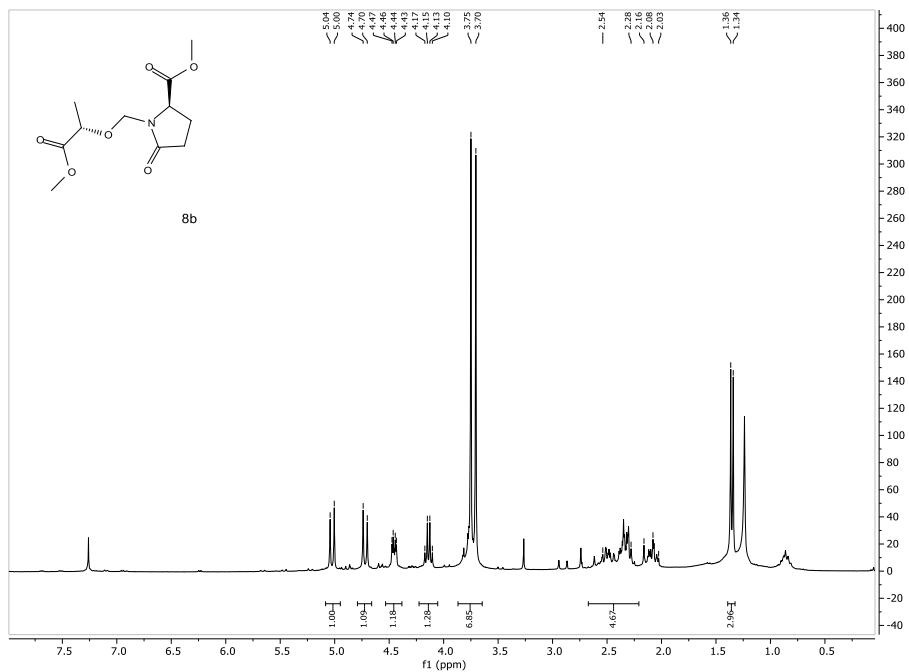

S 55. NMR-<sup>1</sup>H (300 MHz, CDCl<sub>3</sub>) of 8b.

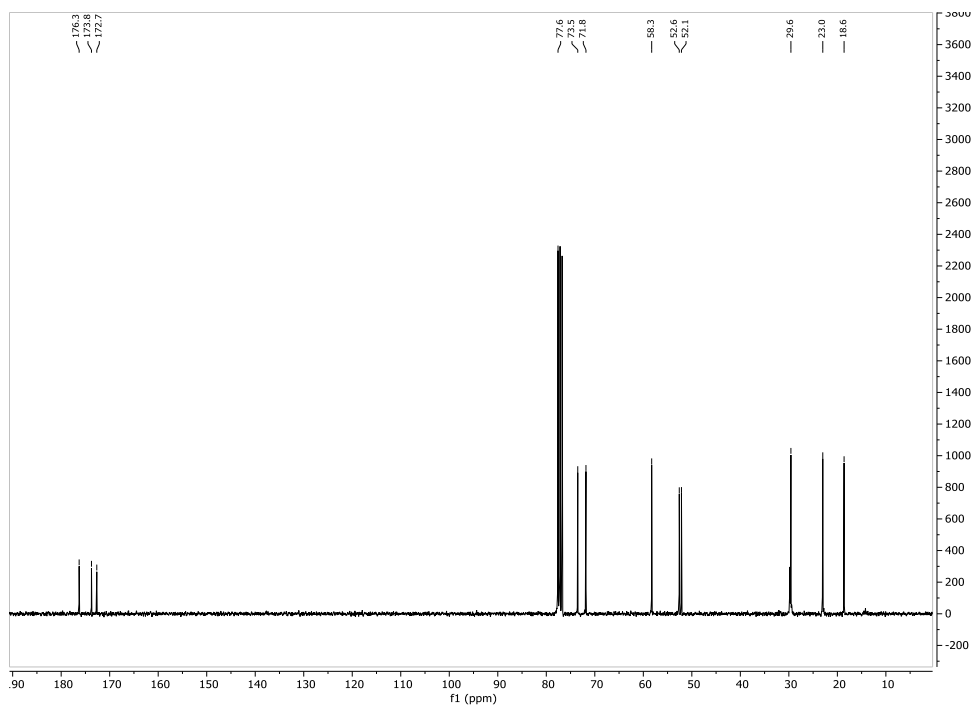

S 56. NMR-<sup>13</sup>C (75 MHz, CDCl<sub>3</sub>) of 8b.

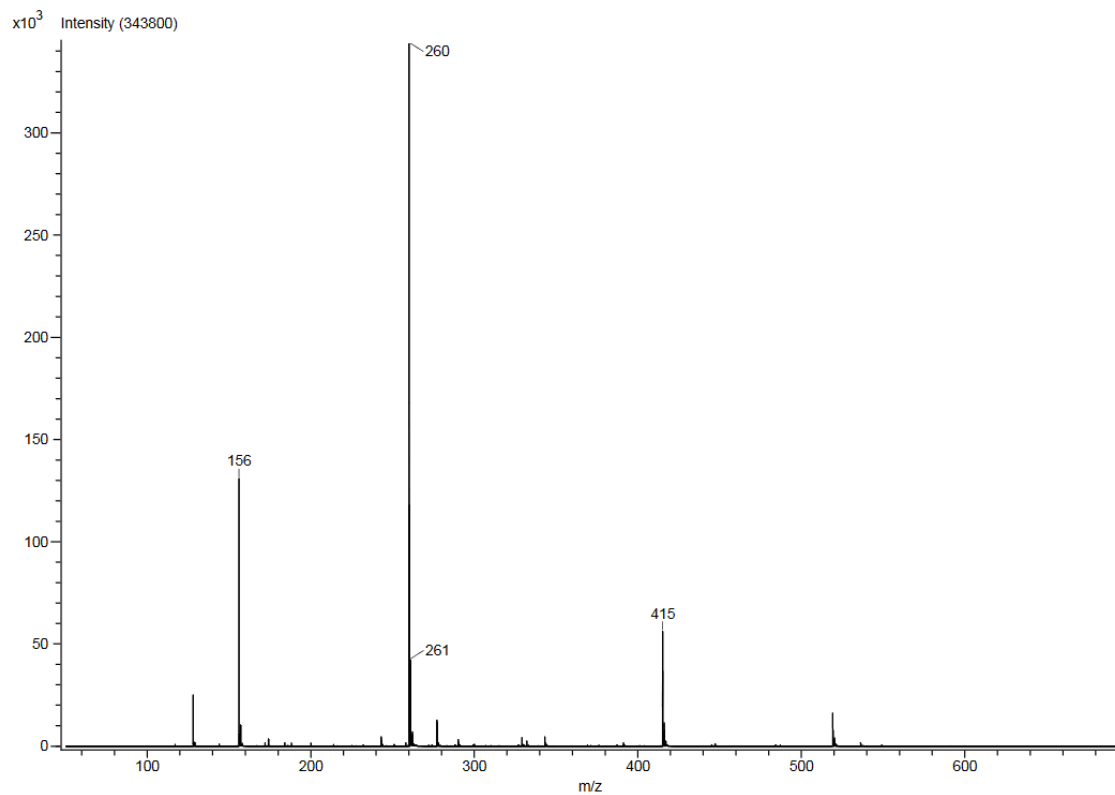

S 57. DART+ of 8b.

Charge number:1  
 Element:<sup>12</sup>C:0 .. 25, <sup>1</sup>H:0 .. 44, <sup>14</sup>N:0 .. 1, <sup>16</sup>O:0 .. 7

Tolerance:3.00(ppm), 5.00 .. 15.00(mmu)

Unsaturation Number:0.0 .. 100.0 (Fraction:Both)

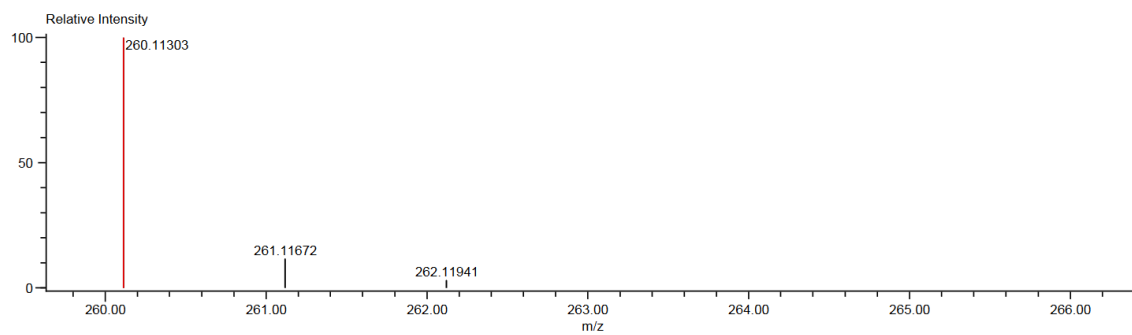

| Mass      | Intensity | Calc. Mass | Mass Difference (mmu) | Mass Difference (ppm) | Possible Formula                                                                                                     | Unsaturation Number |
|-----------|-----------|------------|-----------------------|-----------------------|----------------------------------------------------------------------------------------------------------------------|---------------------|
| 260.11303 | 416648.92 | 260.11341  | -0.38                 | -1.46                 | <sup>12</sup> C <sub>11</sub> <sup>1</sup> H <sub>18</sub> <sup>14</sup> N <sub>1</sub> <sup>16</sup> O <sub>6</sub> | 3.5                 |

S 58. ESI-HRMS of 8b.

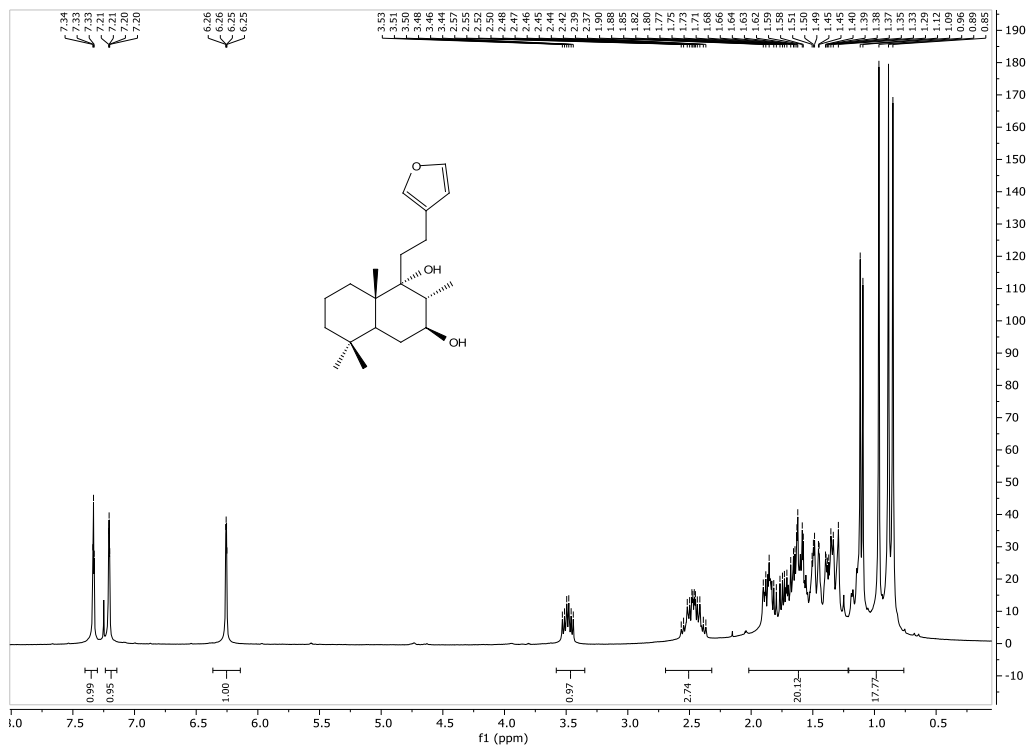

S 59. NMR- $^1\text{H}$  (300 MHz,  $\text{CDCl}_3$ ) of hispanolone  $\beta$  alcohol.

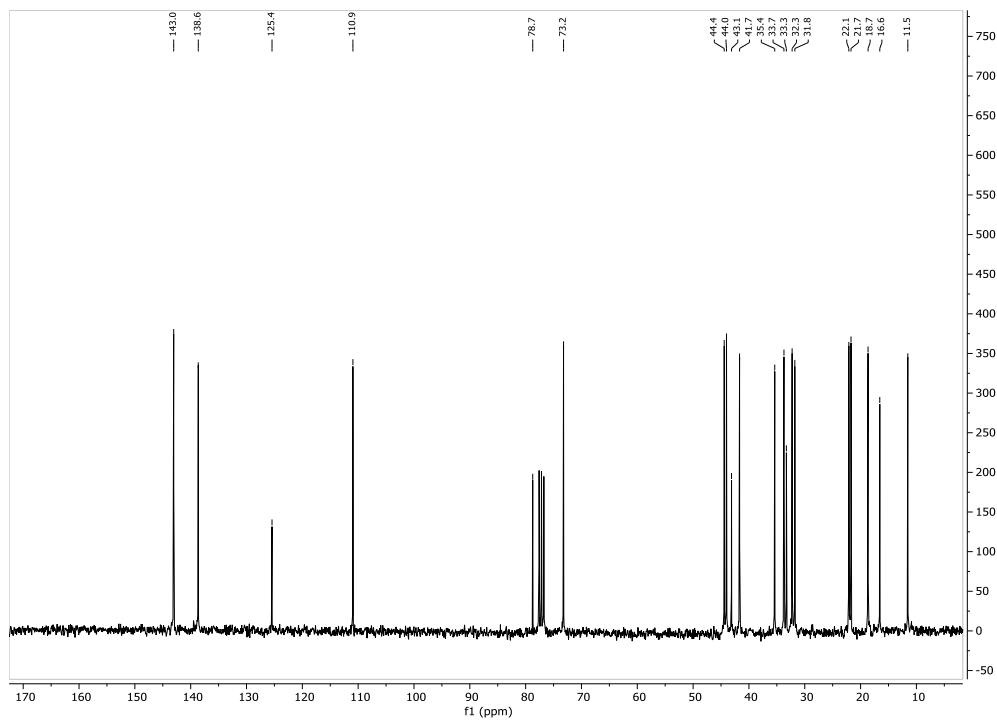

S 60. NMR- $^{13}\text{C}$  (75 MHz,  $\text{CDCl}_3$ ) of hispanolone  $\beta$  alcohol.

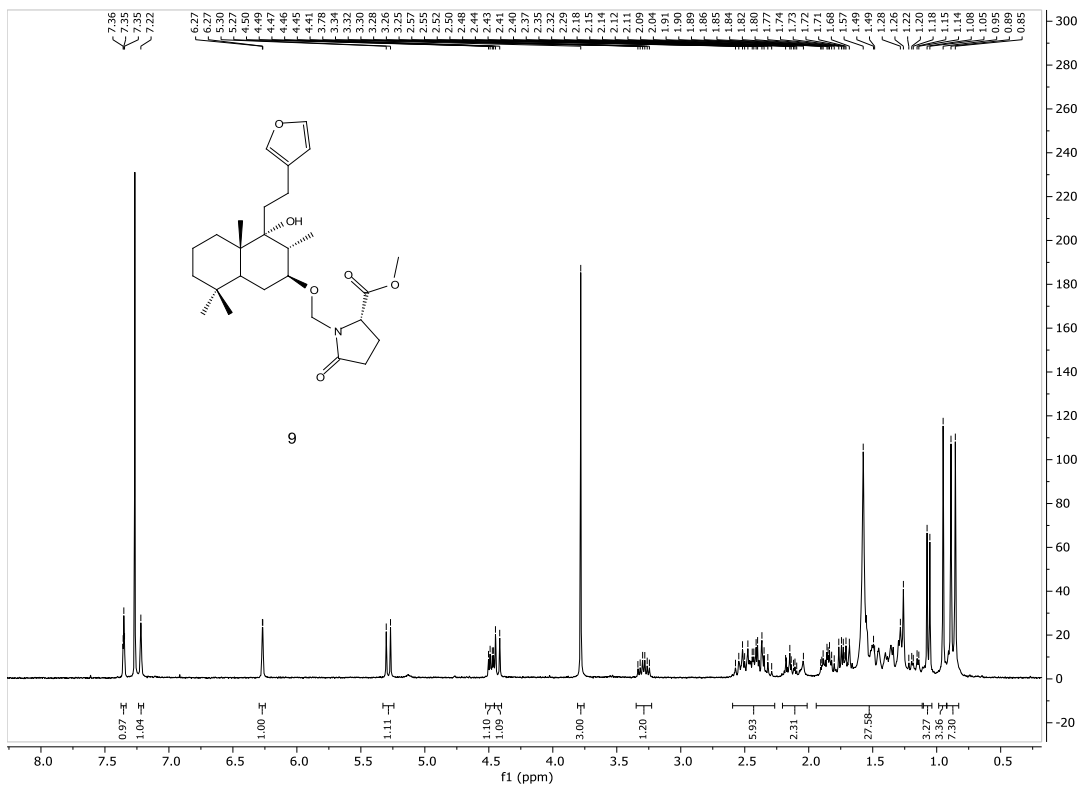

S 61. NMR-<sup>1</sup>H (300 MHz, CDCl<sub>3</sub>) of 9

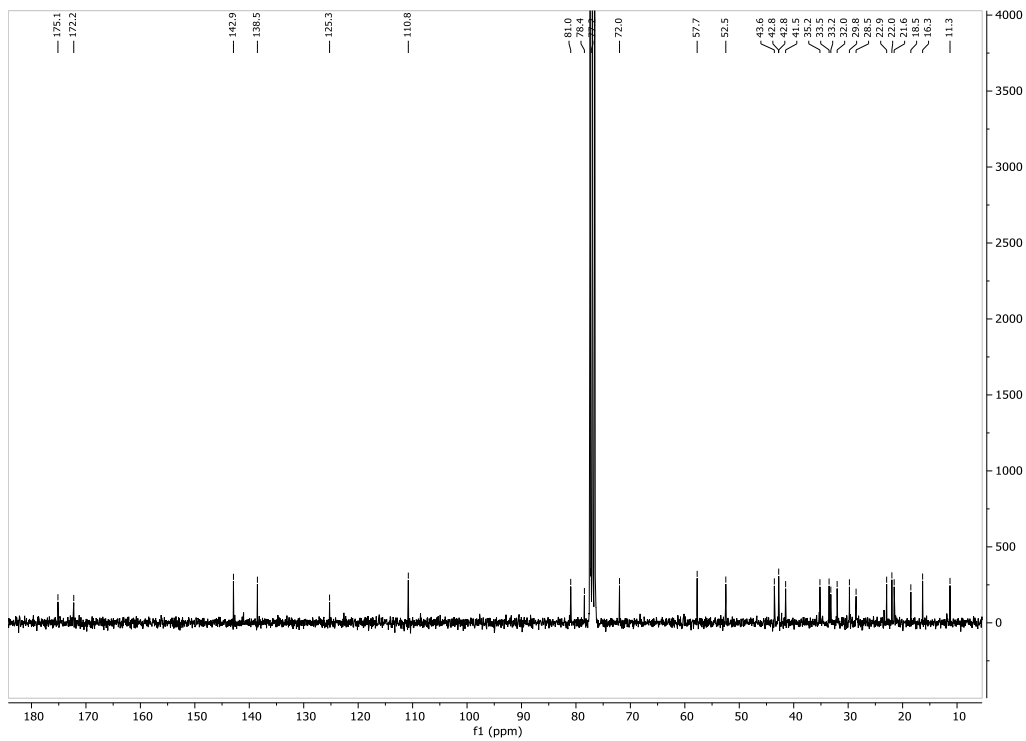

S 62. NMR-<sup>13</sup>C (75MHz, CDCl<sub>3</sub>) of 9.

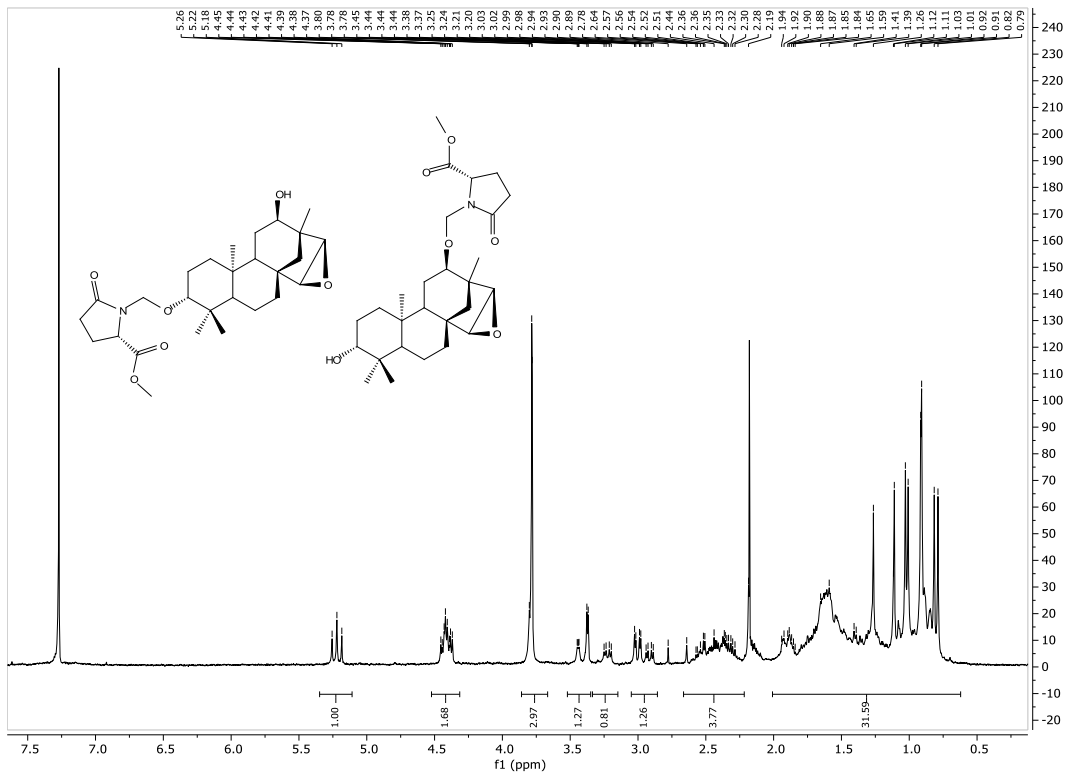

S 63. NMR-<sup>1</sup>H (300 MHz, CDCl<sub>3</sub>) mixture of **10.1** and **10.2**

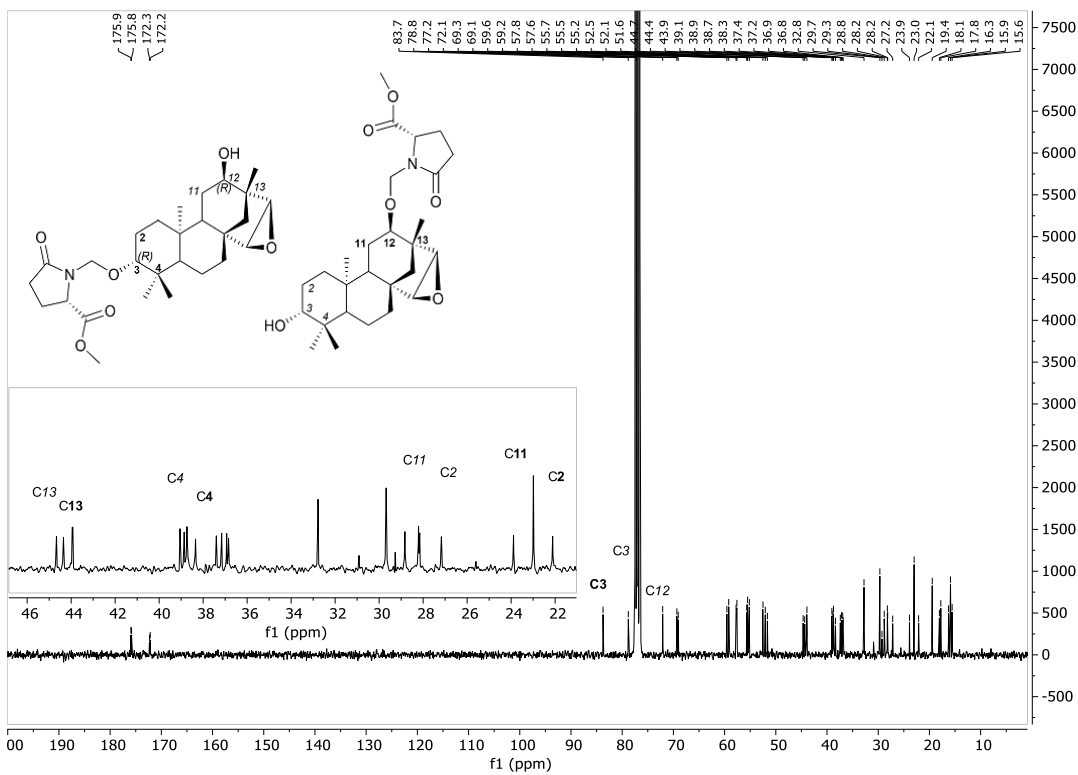

S 64. NMR-<sup>13</sup>C (75MHz, CDCl<sub>3</sub>) mixture of **10.1** and **10.2**.



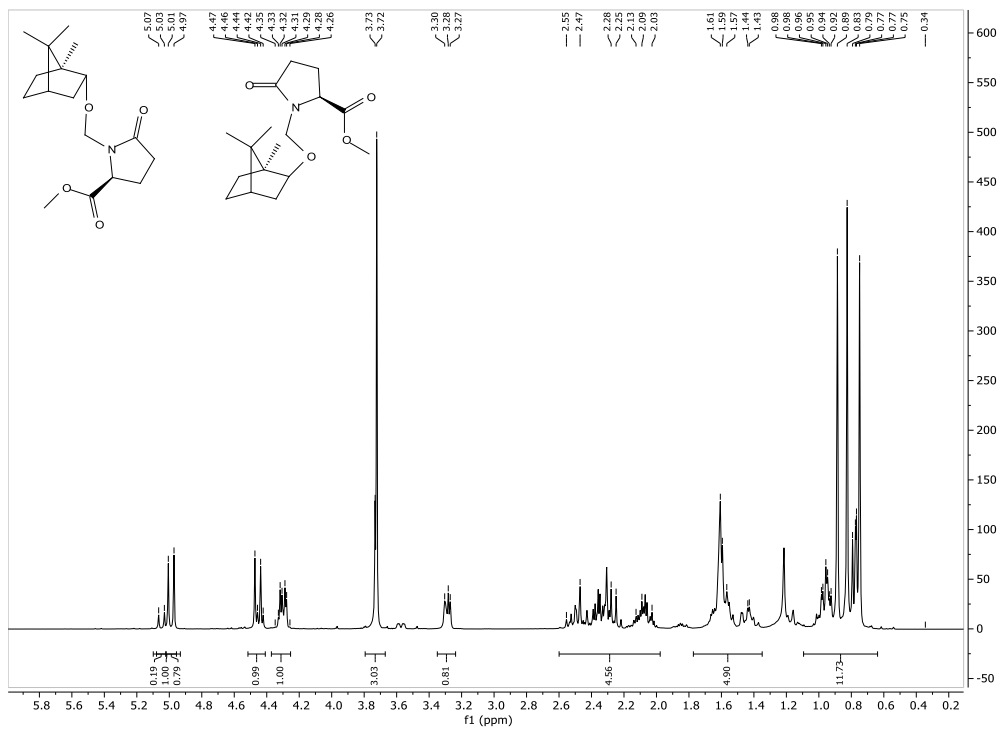

S 65. NMR-<sup>1</sup>H (300 MHz, CDCl<sub>3</sub>) mixture of borneol and isborneol with 1-(S).

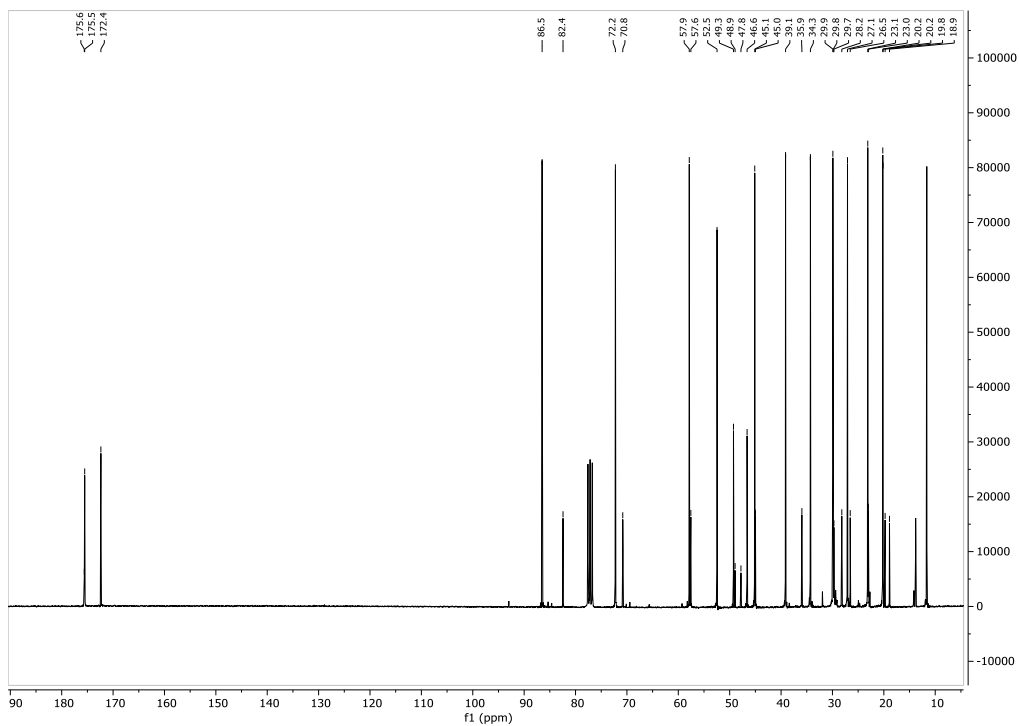

S 66. NMR-<sup>13</sup>C (75 MHz, CDCl<sub>3</sub>) of mixture of borneol and isborneol **11.1** and **12.1**.

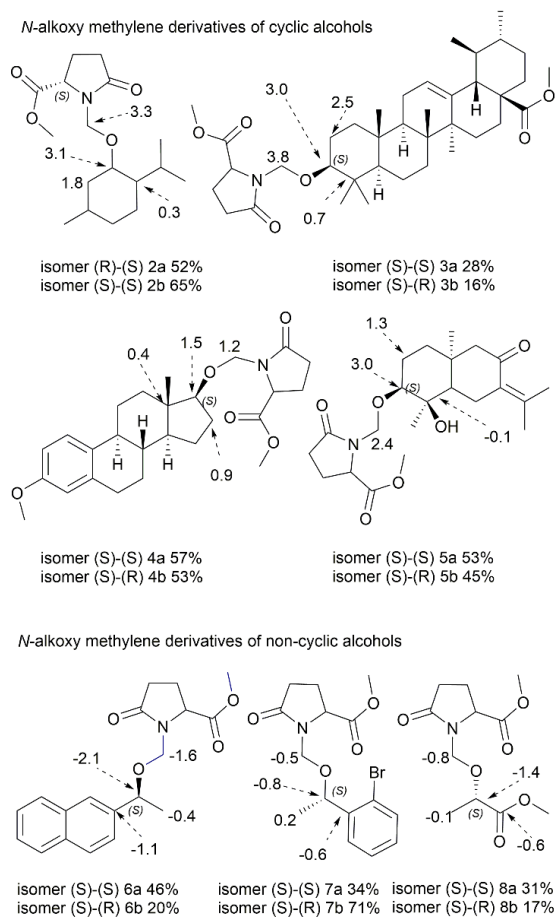

Figure 1.  $^{13}\text{C}$  NMR  $\Delta\delta_{\text{S-R}}$  between diastereomeric *N*-alkoxy methylene derivatives

Table 1.  $^{13}\text{C}$  NMR  $\Delta\delta_{\text{S-R}}$  between diastereomeric *N*-alkoxy methylene derivatives and GIAO/B3LYP (gas phase)/6-31+G(d)  $\Delta\delta_{\text{S-R}}$  calculated, considering only the lowest-energy conformers.

| Derivatives | Experimental $\Delta\delta_{\text{S-R}}$ |                |                |                            | Calculated $\Delta\delta_{\text{S-R}}$ |                |                |                            |
|-------------|------------------------------------------|----------------|----------------|----------------------------|----------------------------------------|----------------|----------------|----------------------------|
|             | C <sup>1</sup>                           | C <sup>2</sup> | C <sup>3</sup> | <i>N</i> -alkoxy methylene | C <sup>1</sup>                         | C <sup>2</sup> | C <sup>3</sup> | <i>N</i> -alkoxy methylene |
| 2a-2b       | 3.1                                      | 0.3            | 1.8            | 3.3                        | 3.3                                    | 0.2            | 0.5            | 1.5                        |
| 3a-3b       | 3.0                                      | 0.7            | 2.5            | 3.8                        | -0.3                                   | -0.2           | -0.2           | -0.1                       |
| 4a-4b       | 1.5                                      | 0.4            | 0.9            | 1.2                        | 0.5                                    | 0.1            | 0.04           | 0.8                        |
| 5a-5b       | 3.0                                      | -0.1           | 1.3            | 2.4                        | 7.1                                    | 2.6            | -0.3           | 2.3                        |
| 6a-6b       | -2.7                                     | -1.5           | -0.4           | -1.5                       | -1.3                                   | -0.9           | -1.1           | -2.8                       |
| 7a-7b       | -0.8                                     | -0.6           | 0.2            | -0.5                       | 3                                      | -0.6           | 5              | 0.9                        |
| 8a-8b       | -1.4                                     | -0.6           | -0.1           | -0.8                       | -3.8                                   | -0.7           | -5             | -0.6                       |

Table 2. Dihedral angles of some *N*-alkoxy methylene derivatives calculated by GIAO model.

| Alcohol | <b>1</b> configuration | dihedral angle |
|---------|------------------------|----------------|
| 2-(R)   | (S)                    | 175.7°         |
| 2-(S)   | (S)                    | 164.9°         |
| 3-(S)   | (S)                    | 175.2°         |
|         | (R)                    | -104.5°        |
| 4-(S)   | (S)                    | 173.2°         |
|         | (R)                    | 175.3°         |
| 5-(S)   | (S)                    | 136.7°         |
|         | (R)                    | -173.9°        |
| 6-(S)   | (S)                    | -175.2°        |
|         | (R)                    | 180.0°         |
| 7-(S)   | (S)                    | 162.6°         |
|         | (R)                    | 162.6°         |
| 8-(S)   | (S)                    | 180.0°         |
|         | (R)                    | 180.0°         |

**Gaussian 16 revision.**

**(+)-Menthol. 2-(R)**

|   |             |             |             |
|---|-------------|-------------|-------------|
| O | -0.04964100 | -0.08799000 | -0.25892700 |
| C | -1.44611000 | -0.04225300 | -0.58591200 |
| C | 4.34991800  | -0.18153500 | -0.11743400 |
| C | 4.28955000  | 0.90470800  | -1.19739300 |
| C | 3.02725400  | -0.97616900 | -0.27886500 |
| H | 5.21177200  | -0.84039100 | -0.21283400 |
| H | 4.37825700  | 0.27209100  | 0.87175100  |
| H | 4.83270400  | 0.62765900  | -2.10513400 |
| H | 4.67151100  | 1.87173100  | -0.87307500 |
| H | 3.17535600  | -1.89222400 | -0.85914900 |
| N | 2.15939300  | -0.05561200 | -1.00597500 |
| C | 2.81789400  | 1.01727800  | -1.56574400 |
| O | 2.30639200  | 1.86334000  | -2.26881000 |
| C | 2.42431300  | -1.44073400 | 1.04793200  |
| O | 2.12844400  | -2.58841400 | 1.27242000  |
| O | 2.28666000  | -0.43911600 | 1.92502000  |
| C | 1.65211700  | -0.78018700 | 3.17057600  |
| H | 2.22520100  | -1.54631500 | 3.69188300  |
| H | 1.62675300  | 0.14156500  | 3.74555100  |
| H | 0.64295200  | -1.14555400 | 2.98456900  |
| C | 0.80391200  | -0.37594200 | -1.35185900 |
| H | 0.53573400  | 0.23603500  | -2.21816000 |
| H | 0.74884900  | -1.43939900 | -1.61482800 |
| C | -2.02039300 | -1.45290000 | -0.76441300 |
| C | -2.16459000 | 0.72618200  | 0.53446300  |
| H | -1.55717800 | 0.51130200  | -1.52991700 |
| C | -3.53352000 | -1.45377600 | -1.02242600 |
| H | -1.80213700 | -2.02734600 | 0.14360800  |
| C | -3.67984700 | 0.72948300  | 0.26164300  |
| H | -1.99690100 | 0.14492100  | 1.45182600  |
| C | -4.24934600 | -0.68177600 | 0.09158500  |
| H | -3.71479600 | -0.91916000 | -1.96517200 |
| H | -3.88893800 | 1.30662800  | -0.64565500 |
| H | -5.32198400 | -0.62885900 | -0.12107700 |
| H | -4.14617600 | -1.23654400 | 1.03295700  |
| C | -4.07483700 | -2.87628600 | -1.17809500 |
| H | -3.57758500 | -3.40506500 | -1.99560100 |
| H | -3.91795300 | -3.45640900 | -0.26364400 |
| H | -5.14765100 | -2.87036200 | -1.38809200 |
| C | -1.56313700 | 2.13275400  | 0.79218700  |
| H | -0.48448300 | 1.98163700  | 0.87964700  |
| C | -1.79033500 | 3.13503700  | -0.34774200 |
| H | -1.25958600 | 4.06704600  | -0.13854100 |
| H | -1.41774100 | 2.76447300  | -1.30485700 |
| H | -2.84821600 | 3.38379300  | -0.46816300 |
| C | -2.04920900 | 2.71727400  | 2.12553400  |
| H | -3.11697000 | 2.95253800  | 2.10690500  |
| H | -1.87504300 | 2.02349900  | 2.95302700  |

|   |             |             |             |
|---|-------------|-------------|-------------|
| H | -1.51841800 | 3.64516400  | 2.35364900  |
| H | -1.51042800 | -1.96273600 | -1.58755600 |
| H | -4.19929100 | 1.24004900  | 1.07606000  |

(-)-Menthol. **2 (S)**

|   |             |             |             |
|---|-------------|-------------|-------------|
| C | -0.13101800 | 1.46084800  | -0.15260000 |
| C | 0.66356500  | 0.32165300  | 0.50586000  |
| C | -1.62490400 | 1.37764500  | 0.18013500  |
| H | -0.00215200 | 1.42098900  | -1.23706800 |
| H | 0.46734600  | 0.38292100  | 1.58588000  |
| C | -2.22877100 | 0.02385600  | -0.21795300 |
| H | -1.76958800 | 1.53002700  | 1.25824500  |
| H | -2.16751200 | 2.18570900  | -0.32116200 |
| C | -1.41568300 | -1.11625800 | 0.41136600  |
| H | -2.14205700 | -0.06849400 | -1.30687800 |
| H | -1.80565600 | -2.08657900 | 0.07836800  |
| H | -1.54247600 | -1.09727200 | 1.50115100  |
| C | 2.20141500  | 0.48786200  | 0.36844800  |
| H | 2.42265200  | 1.43205800  | 0.88383200  |
| C | 2.97041500  | -0.61264000 | 1.11140500  |
| H | 2.88326300  | -1.57670800 | 0.60362700  |
| H | 4.03457600  | -0.36874700 | 1.16179300  |
| H | 2.61041500  | -0.73698600 | 2.13705500  |
| C | 2.72929300  | 0.63311700  | -1.06614900 |
| H | 2.25507000  | 1.46262800  | -1.59390500 |
| H | 3.80478200  | 0.83137200  | -1.04600600 |
| H | 2.55647500  | -0.27271800 | -1.64687500 |
| C | -3.70983300 | -0.07357200 | 0.15234300  |
| H | -4.28930200 | 0.72256400  | -0.32265700 |
| H | -4.13840700 | -1.02951200 | -0.16153700 |
| H | -3.85143900 | 0.01390600  | 1.23431200  |
| C | 0.08463600  | -1.04244700 | 0.09750600  |
| H | 0.59559000  | -1.82973200 | 0.66471900  |
| O | 0.33025400  | -1.25125800 | -1.30413400 |
| H | -0.07108100 | -2.08879400 | -1.56088500 |
| H | 0.27277700  | 2.42305300  | 0.17890000  |

**Methyl-(S)-1-(((1R,2S,5R)-2-isopropyl-5-methylcyclohexyl)oxy)methyl)-5-oxopyrrolidine-2-carboxylate 2a.**

|   |             |             |             |
|---|-------------|-------------|-------------|
| C | -4.34991800 | -0.18153500 | 0.11743400  |
| C | -4.28955000 | 0.90470800  | 1.19739300  |
| C | -3.02725400 | -0.97616900 | 0.27886500  |
| H | -5.21177200 | -0.84039100 | 0.21283400  |
| H | -4.37825700 | 0.27209100  | -0.87175100 |
| H | -4.83270400 | 0.62765900  | 2.10513400  |
| H | -4.67151100 | 1.87173100  | 0.87307500  |
| H | -3.17535600 | -1.89222400 | 0.85914900  |

|   |             |             |             |
|---|-------------|-------------|-------------|
| N | -2.15939300 | -0.05561200 | 1.00597500  |
| C | -2.81789400 | 1.01727800  | 1.56574400  |
| O | -2.30639200 | 1.86334000  | 2.26881000  |
| C | -2.42431300 | -1.44073400 | -1.04793200 |
| O | -2.12844400 | -2.58841400 | -1.27242000 |
| O | -2.28666000 | -0.43911600 | -1.92502000 |
| C | -1.65211700 | -0.78018700 | -3.17057600 |
| H | -2.22520100 | -1.54631500 | -3.69188300 |
| H | -1.62675300 | 0.14156500  | -3.74555100 |
| H | -0.64295200 | -1.14555400 | -2.98456900 |
| C | -0.80391200 | -0.37594200 | 1.35185900  |
| H | -0.53573400 | 0.23603500  | 2.21816000  |
| H | -0.74884900 | -1.43939900 | 1.61482800  |
| O | 0.04964100  | -0.08799000 | 0.25892700  |
| C | 1.44611000  | -0.04225300 | 0.58591200  |
| C | 2.02039300  | -1.45290000 | 0.76441300  |
| C | 2.16459000  | 0.72618200  | -0.53446300 |
| H | 1.55717800  | 0.51130200  | 1.52991700  |
| C | 3.53352000  | -1.45377600 | 1.02242600  |
| H | 1.80213700  | -2.02734600 | -0.14360800 |
| C | 3.67984700  | 0.72948300  | -0.26164300 |
| H | 1.99690100  | 0.14492100  | -1.45182600 |
| C | 4.24934600  | -0.68177600 | -0.09158500 |
| H | 3.71479600  | -0.91916000 | 1.96517200  |
| H | 3.88893800  | 1.30662800  | 0.64565500  |
| H | 5.32198400  | -0.62885900 | 0.12107700  |
| H | 4.14617600  | -1.23654400 | -1.03295700 |
| C | 4.07483700  | -2.87628600 | 1.17809500  |
| H | 3.57758500  | -3.40506500 | 1.99560100  |
| H | 3.91795300  | -3.45640900 | 0.26364400  |
| H | 5.14765100  | -2.87036200 | 1.38809200  |
| C | 1.56313700  | 2.13275400  | -0.79218700 |
| H | 0.48448300  | 1.98163700  | -0.87964700 |
| C | 1.79033500  | 3.13503700  | 0.34774200  |
| H | 1.25958600  | 4.06704600  | 0.13854100  |
| H | 1.41774100  | 2.76447300  | 1.30485700  |
| H | 2.84821600  | 3.38379300  | 0.46816300  |
| C | 2.04920900  | 2.71727400  | -2.12553400 |
| H | 3.11697000  | 2.95253800  | -2.10690500 |
| H | 1.87504300  | 2.02349900  | -2.95302700 |
| H | 1.51841800  | 3.64516400  | -2.35364900 |
| H | 1.51042800  | -1.96273600 | 1.58755600  |
| H | 4.19929100  | 1.24004900  | -1.07606000 |

**Methyl-(S)-1-(((1S,2R,5S)-2-isopropyl-5-methylcyclohexyl)oxy)methyl)-5-oxopyrrolidine-2-carboxylate 2b.**

|    |             |             |             |
|----|-------------|-------------|-------------|
| .C | -4.34991800 | -0.18153500 | 0.11743400  |
| C  | -4.28955000 | 0.90470800  | 1.19739300  |
| C  | -3.02725400 | -0.97616900 | 0.27886500  |
| H  | -5.21177200 | -0.84039100 | 0.21283400  |
| H  | -4.37825700 | 0.27209100  | -0.87175100 |

|   |             |             |             |
|---|-------------|-------------|-------------|
| H | -4.83270400 | 0.62765900  | 2.10513400  |
| H | -4.67151100 | 1.87173100  | 0.87307500  |
| H | -3.17535600 | -1.89222400 | 0.85914900  |
| N | -2.15939300 | -0.05561200 | 1.00597500  |
| C | -2.81789400 | 1.01727800  | 1.56574400  |
| O | -2.30639200 | 1.86334000  | 2.26881000  |
| C | -2.42431300 | -1.44073400 | -1.04793200 |
| O | -2.12844400 | -2.58841400 | -1.27242000 |
| O | -2.28666000 | -0.43911600 | -1.92502000 |
| C | -1.65211700 | -0.78018700 | -3.17057600 |
| H | -2.22520100 | -1.54631500 | -3.69188300 |
| H | -1.62675300 | 0.14156500  | -3.74555100 |
| H | -0.64295200 | -1.14555400 | -2.98456900 |
| C | -0.80391200 | -0.37594200 | 1.35185900  |
| H | -0.53573400 | 0.23603500  | 2.21816000  |
| H | -0.74884900 | -1.43939900 | 1.61482800  |
| O | 0.04964100  | -0.08799000 | 0.25892700  |
| C | 1.44611000  | -0.04225300 | 0.58591200  |
| C | 2.02039300  | -1.45290000 | 0.76441300  |
| C | 2.16459000  | 0.72618200  | -0.53446300 |
| H | 1.55717800  | 0.51130200  | 1.52991700  |
| C | 3.53352000  | -1.45377600 | 1.02242600  |
| H | 1.80213700  | -2.02734600 | -0.14360800 |
| C | 3.67984700  | 0.72948300  | -0.26164300 |
| H | 1.99690100  | 0.14492100  | -1.45182600 |
| C | 4.24934600  | -0.68177600 | -0.09158500 |
| H | 3.71479600  | -0.91916000 | 1.96517200  |
| H | 3.88893800  | 1.30662800  | 0.64565500  |
| H | 5.32198400  | -0.62885900 | 0.12107700  |
| H | 4.14617600  | -1.23654400 | -1.03295700 |
| C | 4.07483700  | -2.87628600 | 1.17809500  |
| H | 3.57758500  | -3.40506500 | 1.99560100  |
| H | 3.91795300  | -3.45640900 | 0.26364400  |
| H | 5.14765100  | -2.87036200 | 1.38809200  |
| C | 1.56313700  | 2.13275400  | -0.79218700 |
| H | 0.48448300  | 1.98163700  | -0.87964700 |
| C | 1.79033500  | 3.13503700  | 0.34774200  |
| H | 1.25958600  | 4.06704600  | 0.13854100  |
| H | 1.41774100  | 2.76447300  | 1.30485700  |
| H | 2.84821600  | 3.38379300  | 0.46816300  |
| C | 2.04920900  | 2.71727400  | -2.12553400 |
| H | 3.11697000  | 2.95253800  | -2.10690500 |
| H | 1.87504300  | 2.02349900  | -2.95302700 |
| H | 1.51841800  | 3.64516400  | -2.35364900 |
| H | 1.51042800  | -1.96273600 | 1.58755600  |
| H | 4.19929100  | 1.24004900  | -1.07606000 |

### Ursolic acid Methyl ester. 3

|   |             |             |             |
|---|-------------|-------------|-------------|
| C | 3.62216600  | 0.80294500  | -1.78826600 |
| C | 5.15132400  | 0.82203100  | -1.85537900 |
| C | 5.77623100  | 1.08204000  | -0.48976200 |
| C | 5.35411400  | 0.05930600  | 0.59310300  |
| C | 3.78646300  | 0.01390600  | 0.59827500  |
| C | 3.17280400  | -0.88283100 | 1.68126900  |
| C | 1.70572300  | -0.50921500 | 1.91770100  |
| C | 0.80818700  | -0.58709000 | 0.65787600  |
| C | 1.53625800  | 0.11780400  | -0.53700800 |
| C | 3.06400900  | -0.22470500 | -0.76931600 |
| C | 0.68828100  | 0.03046800  | -1.81360800 |
| C | -0.77957300 | 0.20472400  | -1.57555600 |
| C | -1.38261800 | 0.28177200  | -0.38919300 |
| C | -0.58411400 | 0.17404600  | 0.91706100  |
| C | -1.46025100 | -0.58469300 | 1.96675300  |
| C | -2.56443900 | -1.44634800 | 1.35442700  |
| C | -3.62088800 | -0.59926500 | 0.59155300  |
| C | -2.90481000 | 0.44426900  | -0.36330200 |
| C | -3.43858800 | 1.90148800  | -0.15197400 |
| C | -4.98343500 | 1.86092100  | -0.21646900 |
| C | -5.55566700 | 1.06231000  | 0.97830200  |
| C | -4.54433600 | 0.09792500  | 1.60678800  |
| C | 5.84849500  | 0.60855800  | 1.95042500  |
| C | 6.03604300  | -1.30494500 | 0.37359300  |
| C | 3.29446200  | -1.64109600 | -1.35127600 |
| C | 0.54234600  | -2.07789700 | 0.35181900  |
| C | -0.35508600 | 1.60292400  | 1.47980100  |
| C | -4.45662900 | -1.60650200 | -0.20585600 |
| C | -2.83561200 | 2.86164300  | -1.18113900 |
| C | -5.65447800 | 3.23665800  | -0.29259700 |
| C | -4.50404900 | -3.07005700 | -2.05916400 |
| H | 1.29202400  | -1.14507900 | 2.70599800  |
| H | 3.50288000  | 1.04047300  | 0.87414500  |
| H | 3.27051800  | -1.93859700 | 1.41818100  |
| H | 3.70635900  | -0.76103700 | 2.62549500  |
| H | 1.56375700  | 1.17806100  | -0.27046200 |
| H | 1.70446100  | 0.50760100  | 2.31287200  |
| H | 3.22314500  | 0.60211500  | -2.78568700 |
| H | 5.47050100  | 1.60994600  | -2.54815000 |
| H | 3.27149700  | 1.80418500  | -1.51049500 |
| H | 5.54591300  | -0.11320300 | -2.25988400 |
| H | 5.43324300  | 2.06854800  | -0.14178700 |
| H | 2.49799800  | -1.92272700 | -2.03981800 |
| H | 4.22255500  | -1.68835400 | -1.91874000 |
| H | 3.35484800  | -2.41599700 | -0.59007800 |
| H | 5.87957000  | -1.71171100 | -0.62328900 |
| H | 7.11203100  | -1.20699300 | 0.51911700  |
| H | 5.66656700  | -2.03714800 | 1.09471000  |
| H | 6.91212000  | 0.84041600  | 1.88938300  |
| H | 5.31726300  | 1.52421000  | 2.22695400  |



|   |             |             |             |
|---|-------------|-------------|-------------|
| H | 5.71369400  | -0.11538800 | 2.75536600  |
| H | 1.01638500  | 0.78872300  | -2.53193500 |
| H | 0.83579700  | -0.92645200 | -2.32778100 |
| H | -1.39179900 | 0.25151900  | -2.47316300 |
| H | -0.08766100 | -2.21614000 | -0.52647700 |
| H | 1.46921700  | -2.61843600 | 0.17991900  |
| H | 0.05108000  | -2.56656800 | 1.19385500  |
| H | -1.29677200 | 2.14817800  | 1.50793300  |
| H | 0.02114200  | 1.57437300  | 2.50373800  |
| H | 0.33724700  | 2.19095800  | 0.87719600  |
| H | -0.83144800 | -1.20593700 | 2.60587600  |
| H | -1.91560800 | 0.14394000  | 2.64112800  |
| H | -3.21908300 | 0.20466600  | -1.38021200 |
| H | -2.12840400 | -2.17462900 | 0.67123900  |
| H | -3.07409700 | -2.01194000 | 2.14035900  |
| H | -3.16271200 | 2.26554600  | 0.84326500  |
| H | -5.23831200 | 1.32612500  | -1.14177700 |
| H | -1.74650700 | 2.83361500  | -1.16221200 |
| H | -3.15304100 | 2.59961800  | -2.19601500 |
| H | -3.14517600 | 3.89014300  | -0.99101500 |
| H | -5.42003600 | 3.76878300  | -1.21575000 |
| H | -6.74129100 | 3.12645100  | -0.24414300 |
| H | -5.35225600 | 3.86839000  | 0.54903800  |
| H | -5.06996900 | -0.66187200 | 2.18695000  |
| H | -3.91561200 | 0.64656200  | 2.31047700  |
| O | -5.55107600 | -2.00803800 | 0.11039400  |
| O | -3.80996800 | -2.06610800 | -1.30042600 |
| H | -5.45252700 | -2.68159800 | -2.42962700 |
| H | -3.84310600 | -3.31884900 | -2.88590100 |
| H | -4.69680700 | -3.94855700 | -1.44355500 |
| H | -6.44412800 | 0.51434300  | 0.65852000  |
| H | -5.88788800 | 1.76282700  | 1.75163400  |
| O | 7.20803500  | 1.09500200  | -0.56747600 |
| H | 7.47249000  | 1.75348600  | -1.21860700 |

**Methyl-(S)-1-((((3S,4aR,6aR,6bS,8aS,11R,12S,12aS,14aR,14bR)-8a-(methoxycarbonyl)-4,4,6a,6b,11,12,14b-heptamethyl-1,2,3,4,4a,5,6,6a,6b,7,8,8a,9,10,11,12,12a,14,14a,14b-icosahdropicen-3-yl)oxy)methyl)-5-oxopyrrolidone-2-carboxylate, 3a.**

|   |             |             |             |
|---|-------------|-------------|-------------|
| C | 1.29758300  | -0.71371600 | -1.55958900 |
| C | 2.80825800  | -0.95421800 | -1.51286600 |
| C | 3.45616500  | -0.26477600 | -0.31550800 |
| C | 2.84931800  | -0.68254900 | 1.04860500  |
| C | 1.29621100  | -0.49096000 | 0.94666500  |
| C | 0.52863800  | -0.77345700 | 2.24475000  |
| C | -0.85844400 | -0.12445900 | 2.19823900  |
| C | -1.74066000 | -0.57115400 | 1.00637700  |
| C | -0.89059200 | -0.52266800 | -0.30889500 |
| C | 0.56166000  | -1.15059300 | -0.26677300 |
| C | -1.72459500 | -0.99138600 | -1.50927100 |
| C | -3.14708400 | -0.52631700 | -1.47365400 |
| C | -3.74457300 | 0.10798800  | -0.46531800 |

|   |             |             |             |
|---|-------------|-------------|-------------|
| C | -2.99095900 | 0.42412200  | 0.83367300  |
| C | -3.99308100 | 0.29243200  | 2.02657100  |
| C | -5.20991800 | -0.58253300 | 1.72684500  |
| C | -6.10720500 | 0.01404300  | 0.60827200  |
| C | -5.22086100 | 0.48024800  | -0.62120500 |
| C | -5.51798500 | 1.96021700  | -1.03640500 |
| C | -7.04736800 | 2.11358300  | -1.20886200 |
| C | -7.77086500 | 1.93135900  | 0.14646900  |
| C | -6.93983600 | 1.17226700  | 1.18582200  |
| C | 3.40710800  | 0.29085600  | 2.11032300  |
| C | 3.29635500  | -2.10252400 | 1.44489700  |
| C | 0.56064100  | -2.69826600 | -0.22223800 |
| C | -2.24587400 | -2.00206900 | 1.29487000  |
| C | -2.53636600 | 1.90803500  | 0.79768700  |
| C | -7.06699300 | -1.10626200 | 0.19590800  |
| C | -4.74797400 | 2.33898500  | -2.30441200 |
| C | -7.48498000 | 3.42995600  | -1.85985800 |
| C | -7.27820900 | -3.18867200 | -0.88792400 |
| C | 7.66637900  | 1.38461500  | 0.99470800  |
| C | 7.70842200  | 0.04210000  | 0.28085100  |
| C | 9.16232100  | -0.34281100 | -0.10383200 |
| C | 8.99713400  | -1.18771200 | -1.37003800 |
| C | 7.66130600  | -0.74835300 | -1.95605500 |
| C | 7.77106000  | 3.72257600  | 0.76806000  |
| C | 5.62632200  | 0.34001000  | -1.12793900 |
| O | 4.86665500  | -0.51468200 | -0.28704200 |
| H | -1.38143400 | -0.31941200 | 3.13902100  |
| H | 1.18427200  | 0.58932900  | 0.77052400  |
| H | 0.45234500  | -1.84750500 | 2.42880400  |
| H | 1.06277300  | -0.36185100 | 3.10277400  |
| H | -0.69022500 | 0.53833000  | -0.48202900 |
| H | -0.69556900 | 0.95346100  | 2.15672600  |
| H | 0.88187500  | -1.23368500 | -2.42612500 |
| H | 3.25893500  | -0.58235800 | -2.43693700 |
| H | 1.11732400  | 0.35535200  | -1.72589400 |
| H | 3.04242000  | -2.02037900 | -1.47570800 |
| H | 3.29803400  | 0.82102000  | -0.41417000 |
| H | -0.26357100 | -3.11219600 | -0.80252500 |
| H | 1.47386200  | -3.10593100 | -0.65260800 |
| H | 0.48256100  | -3.10142400 | 0.78527700  |
| H | 3.07708800  | -2.85242400 | 0.68798400  |
| H | 4.37340900  | -2.11469700 | 1.61307100  |
| H | 2.81130900  | -2.41212700 | 2.37281600  |
| H | 4.49536000  | 0.32374800  | 2.05317100  |
| H | 3.02729600  | 1.30561600  | 1.95863700  |
| H | 3.14516500  | -0.01697200 | 3.12328900  |
| H | -1.26700200 | -0.64214400 | -2.44036400 |
| H | -1.72899200 | -2.08455700 | -1.59131600 |
| H | -3.73226700 | -0.75840400 | -2.36030400 |
| H | -2.88638800 | -2.38379000 | 0.50037200  |
| H | -1.41991700 | -2.69774400 | 1.41490600  |
| H | -2.81470400 | -2.03372500 | 2.22466600  |

|   |             |             |             |
|---|-------------|-------------|-------------|
| H | -3.37537900 | 2.54955800  | 0.53430200  |
| H | -2.18109600 | 2.24180000  | 1.77401800  |
| H | -1.75036500 | 2.09372100  | 0.06576400  |
| H | -3.48106300 | -0.09169700 | 2.90983800  |
| H | -4.33761300 | 1.28926400  | 2.31111200  |
| H | -5.55527300 | -0.09813200 | -1.48398900 |
| H | -4.88507600 | -1.57882500 | 1.43034500  |
| H | -5.81428400 | -0.70092200 | 2.63146200  |
| H | -5.20781200 | 2.64557600  | -0.24060800 |
| H | -7.36262500 | 1.30164400  | -1.87835000 |
| H | -3.67864000 | 2.16608900  | -2.18814100 |
| H | -5.08503000 | 1.74427700  | -3.15985700 |
| H | -4.88996400 | 3.39108000  | -2.55428000 |
| H | -7.14475800 | 3.52260300  | -2.89222100 |
| H | -8.57601000 | 3.50003400  | -1.86623000 |
| H | -7.10557300 | 4.29041200  | -1.29935900 |
| H | -7.59602600 | 0.77840900  | 1.96324500  |
| H | -6.25608400 | 1.86709700  | 1.67736800  |
| O | -8.23445900 | -1.17222900 | 0.49342700  |
| O | -6.44878700 | -2.07685000 | -0.51579000 |
| H | -8.10837300 | -2.85480700 | -1.51016300 |
| H | -6.63107000 | -3.86395000 | -1.44202100 |
| H | -7.67806100 | -3.68013700 | -0.00115100 |
| H | -8.71990600 | 1.41731300  | -0.01432500 |
| H | -8.01779200 | 2.91592100  | 0.55692200  |
| H | 5.37616700  | 0.20617500  | -2.18281400 |
| H | 5.46169300  | 1.38481600  | -0.83712100 |
| H | 7.28407500  | -0.67914300 | 0.98300400  |
| H | 8.92030700  | -2.25585800 | -1.14757500 |
| H | 9.79503000  | -1.06072900 | -2.10010000 |
| H | 9.66178400  | -0.85957400 | 0.71359800  |
| H | 9.72617300  | 0.56342100  | -0.33017800 |
| O | 7.22453200  | -1.01286700 | -3.05293800 |
| N | 7.01109200  | 0.00245700  | -0.99565200 |
| O | 7.61624200  | 1.49425400  | 2.19262400  |
| O | 7.74502200  | 2.42460400  | 0.14498100  |
| H | 7.81933200  | 4.43688800  | -0.04931600 |
| H | 6.87130800  | 3.87492600  | 1.36303300  |
| H | 8.64401000  | 3.81453800  | 1.41350000  |

**Methyl-(R)-1-(((3S,4aR,6aR,6bS,8aS,11R,12S,12aS,14aR,14bR)-8a-(methoxycarbonyl)-4,4,6a,6b,11,12,14b-heptamethyl-1,2,3,4,4a,5,6,6a,6b,7,8,8a,9,10,11,12,12a,14,14a,14b-icosahydricen-3-yl)oxy)methyl)-5-oxopyrrolidine-2-carboxylate, 3b.**

|   |             |             |             |
|---|-------------|-------------|-------------|
| C | 1.74657700  | -0.85742100 | 0.37155000  |
| C | 3.26237400  | -0.70277200 | 0.21820000  |
| C | 3.62936400  | -0.16636200 | -1.16009000 |
| C | 2.95125600  | 1.18173800  | -1.51614400 |
| C | 1.41128800  | 1.00800200  | -1.27833800 |
| C | 0.56042900  | 2.22529700  | -1.66369600 |
| C | -0.90558600 | 1.81759800  | -1.84426800 |

|   |             |             |             |
|---|-------------|-------------|-------------|
| C | -1.54741200 | 1.15011900  | -0.60277800 |
| C | -0.57195500 | 0.05861200  | -0.04528300 |
| C | 0.95414600  | 0.44767500  | 0.10809300  |
| C | -1.16132700 | -0.60556200 | 1.20673200  |
| C | -2.63885900 | -0.83326100 | 1.13041300  |
| C | -3.45522600 | -0.40116100 | 0.16969800  |
| C | -2.92803500 | 0.43217700  | -1.00636300 |
| C | -4.02212500 | 1.47877500  | -1.39577200 |
| C | -5.01735500 | 1.78770900  | -0.27783200 |
| C | -5.87120200 | 0.55060300  | 0.11294600  |
| C | -4.94617400 | -0.72552600 | 0.28984800  |
| C | -5.45555300 | -1.94544200 | -0.54871500 |
| C | -6.95702900 | -2.14901300 | -0.23839600 |
| C | -7.78770000 | -0.94752100 | -0.74793200 |
| C | -6.95983600 | 0.32545700  | -0.95134600 |
| C | 3.20291200  | 1.43670600  | -3.01872400 |
| C | 3.59017100  | 2.34790000  | -0.73709300 |
| C | 1.22715300  | 1.41451300  | 1.28634600  |
| C | -1.81645200 | 2.25109100  | 0.44676900  |
| C | -2.74733600 | -0.49874200 | -2.23539200 |
| C | -6.55941300 | 0.91305200  | 1.43231700  |
| C | -4.62476100 | -3.19749900 | -0.25484100 |
| C | -7.54662700 | -3.45626500 | -0.77832900 |
| C | -6.26500500 | 1.31125800  | 3.73666800  |
| C | 7.05064100  | 0.48705600  | 1.03943400  |
| C | 7.61394100  | -0.69743000 | 0.25212700  |
| C | 8.36057000  | -1.66904300 | 1.20606000  |
| C | 7.29625500  | -2.70623700 | 1.58392600  |
| C | 6.30749600  | -2.66940900 | 0.42506100  |
| C | 7.26873600  | 2.79433400  | 1.44947200  |
| C | 5.82593500  | -1.15343000 | -1.48660000 |
| O | 5.05085200  | 0.01087800  | -1.31973700 |
| H | -1.49164100 | 2.69340300  | -2.13814800 |
| H | 1.13122400  | 0.21815300  | -1.99105200 |
| H | 0.65593900  | 3.02079600  | -0.92103000 |
| H | 0.90779100  | 2.65366900  | -2.60556900 |
| H | -0.54645900 | -0.72139100 | -0.81114300 |
| H | -0.93484500 | 1.13167800  | -2.69213200 |
| H | 1.53277700  | -1.23493700 | 1.37439500  |
| H | 3.72770200  | -1.68053600 | 0.35786600  |
| H | 1.40062800  | -1.62902200 | -0.32696900 |
| H | 3.68248500  | -0.05123900 | 0.98642000  |
| H | 3.30129900  | -0.89922500 | -1.91267400 |
| H | 0.56152200  | 1.21551800  | 2.12589300  |
| H | 2.24124700  | 1.29643500  | 1.66445700  |
| H | 1.10965800  | 2.46357900  | 1.02171600  |
| H | 3.60793200  | 2.18488500  | 0.33822200  |
| H | 4.62100800  | 2.48412600  | -1.06594900 |
| H | 3.05241900  | 3.27876200  | -0.92881000 |
| H | 4.26901800  | 1.35496800  | -3.23160900 |
| H | 2.67481000  | 0.70765300  | -3.64024200 |
| H | 2.88154200  | 2.43368700  | -3.32312500 |

|   |             |             |             |
|---|-------------|-------------|-------------|
| H | -0.66890300 | -1.56670100 | 1.38481900  |
| H | -0.95731200 | -0.01461800 | 2.10729900  |
| H | -3.06465900 | -1.39156800 | 1.96082800  |
| H | -2.28005600 | 1.85727300  | 1.35076200  |
| H | -0.89820300 | 2.75290900  | 0.73953800  |
| H | -2.47512700 | 3.02093000  | 0.04332500  |
| H | -3.65164000 | -1.08253900 | -2.39757100 |
| H | -2.57574400 | 0.07299700  | -3.14891100 |
| H | -1.92727400 | -1.20644100 | -2.11530100 |
| H | -3.55576900 | 2.40635800  | -1.73059100 |
| H | -4.57198800 | 1.10960100  | -2.26454200 |
| H | -5.06744900 | -1.05791300 | 1.32213700  |
| H | -4.48524800 | 2.14613300  | 0.60213000  |
| H | -5.69150100 | 2.59076400  | -0.59151200 |
| H | -5.36831900 | -1.73124200 | -1.61915400 |
| H | -7.04093600 | -2.18466700 | 0.85639300  |
| H | -3.56258300 | -3.01830700 | -0.41735200 |
| H | -4.74807500 | -3.51430600 | 0.78608100  |
| H | -4.92353400 | -4.02966300 | -0.89335700 |
| H | -7.11103500 | -4.33956300 | -0.30921300 |
| H | -8.62419100 | -3.48486900 | -0.59553400 |
| H | -7.39626600 | -3.53785200 | -1.85963000 |
| H | -7.62004800 | 1.19383000  | -0.96659300 |
| H | -6.47354200 | 0.28616400  | -1.92797200 |
| O | -7.72347800 | 1.20520200  | 1.55759400  |
| O | -5.69744700 | 0.92561000  | 2.47530200  |
| H | -7.06053500 | 0.62391500  | 4.02402400  |
| H | -5.44631200 | 1.27015400  | 4.45074100  |
| H | -6.67468100 | 2.31956400  | 3.67871200  |
| H | -8.60478200 | -0.74937000 | -0.05229100 |
| H | -8.25194100 | -1.21157800 | -1.70378400 |
| H | 5.21907000  | -2.01780400 | -1.76362800 |
| H | 6.54359100  | -0.93198200 | -2.28241000 |
| H | 6.75663300  | -2.42671400 | 2.49100000  |
| H | 7.68378400  | -3.71537900 | 1.71626200  |
| H | 8.79128400  | -1.15377400 | 2.06356500  |
| H | 9.17456500  | -2.14033500 | 0.65296600  |
| O | 5.44387900  | -3.48267900 | 0.17193400  |
| N | 6.56587800  | -1.53165900 | -0.30460400 |
| H | 8.26265000  | -0.31308500 | -0.53652700 |
| O | 6.19697600  | 0.40097200  | 1.88453400  |
| O | 7.68234600  | 1.62687900  | 0.71407200  |
| H | 7.92885600  | 3.59336900  | 1.12288000  |
| H | 6.23186300  | 3.03421500  | 1.21762000  |
| H | 7.36747900  | 2.62236800  | 2.52056100  |

**Estradiol 3-methyl ether, 4.**

|   |             |             |             |
|---|-------------|-------------|-------------|
| C | -0.14675200 | 2.15146900  | -0.42127300 |
| C | -0.78097400 | 0.83489700  | 0.02957000  |
| C | 0.01491200  | -0.34818900 | -0.57585900 |
| C | 1.26692000  | 2.28116300  | 0.14413600  |

|   |             |             |             |
|---|-------------|-------------|-------------|
| C | -0.59212300 | -1.70956300 | -0.17486800 |
| C | -2.24959600 | 0.68636600  | -0.36060800 |
| C | -2.87938800 | -0.63522200 | 0.14348700  |
| C | -2.10159800 | -1.80737100 | -0.46674100 |
| C | 2.36109700  | -1.32846100 | -0.39087000 |
| C | 3.73656800  | -1.23992500 | -0.19530600 |
| C | 4.30004100  | -0.00175200 | 0.10036500  |
| C | 3.47270100  | 1.11425100  | 0.19202000  |
| C | 2.09854300  | 1.02157500  | -0.00187400 |
| C | 1.51331800  | -0.22469200 | -0.29952000 |
| C | -2.91097900 | -0.75597500 | 1.68026200  |
| C | -4.31342400 | -0.44775000 | -0.38585300 |
| C | -3.27495900 | 1.76727000  | 0.02927400  |
| C | -4.64492100 | 1.04040800  | -0.09449500 |
| O | 5.63288500  | 0.21913000  | 0.31204500  |
| C | 6.51734800  | -0.88628300 | 0.21973200  |
| H | -0.12042600 | 2.18331900  | -1.51734600 |
| H | -0.74860400 | 3.00441100  | -0.09675100 |
| H | -0.69755700 | 0.78717900  | 1.12329000  |
| H | -0.11423300 | -0.26150100 | -1.66633000 |
| H | 1.20021400  | 2.52876000  | 1.21096300  |
| H | 1.79172000  | 3.11862200  | -0.32430400 |
| H | -0.09065600 | -2.51488000 | -0.71568400 |
| H | -0.39728700 | -1.89274900 | 0.88618200  |
| H | -2.26890400 | 0.62617000  | -1.45968400 |
| H | -2.48800000 | -2.76233400 | -0.09912600 |
| H | -2.25437000 | -1.80535300 | -1.55297900 |
| H | 1.95151700  | -2.30242600 | -0.62538900 |
| H | 4.34267500  | -2.13117900 | -0.27791300 |
| H | 3.92819500  | 2.07171400  | 0.42023200  |
| H | -3.41579500 | 0.08729100  | 2.15378600  |
| H | -3.45395000 | -1.65815000 | 1.96394500  |
| H | -1.90920000 | -0.81803900 | 2.10444400  |
| H | -4.29539000 | -0.61422400 | -1.47097900 |
| H | -3.11049200 | 2.11450000  | 1.05244500  |
| H | -3.21391200 | 2.64497600  | -0.61583300 |
| H | -5.26622600 | 1.46914600  | -0.88401400 |
| H | -5.21722800 | 1.10142300  | 0.83310800  |
| H | 7.51167900  | -0.49120400 | 0.41804000  |
| H | 6.27836100  | -1.65338000 | 0.96307300  |
| H | 6.49797000  | -1.33183200 | -0.77989100 |
| O | -5.21830700 | -1.37932200 | 0.20634000  |
| H | -6.07714000 | -1.29201900 | -0.21983500 |

**Methyl-(S)-1-(((8R,9S,13S,14S,17S)-3-methoxy-13-methyl-7,8,9,11,12,13,14,15,16,17-decahydro-6H-cyclopenta[a]phenanthren-17-yl)oxy)methyl)-5-oxopyrrolidin-2-carboxilate, 4a.**

|   |            |             |             |
|---|------------|-------------|-------------|
| C | 3.27401500 | 2.37112300  | -0.61927900 |
| C | 2.38583000 | 1.21112400  | -0.15439600 |
| C | 3.00075600 | -0.12990200 | -0.63939700 |
| C | 4.64461000 | 2.29138800  | 0.05959700  |

|   |             |             |             |
|---|-------------|-------------|-------------|
| H | 2.38642900  | 1.21742500  | 0.94675100  |
| H | 3.38816600  | 2.32619600  | -1.71239500 |
| H | 2.80719900  | 3.33686200  | -0.39048500 |
| H | 4.53898600  | 2.61176300  | 1.10740100  |
| H | 5.34274300  | 3.00291900  | -0.39937500 |
| H | 2.95840200  | -0.09150900 | -1.74281000 |
| C | 2.13538300  | -1.34131200 | -0.21635500 |
| C | 0.93968400  | 1.29480600  | -0.64983900 |
| C | 0.05453800  | 0.13239600  | -0.12956000 |
| C | 0.65323000  | -1.19479300 | -0.62150000 |
| H | 2.52261900  | -2.25683400 | -0.67708300 |
| H | 0.07595800  | -2.04694100 | -0.24125400 |
| H | 2.22403200  | -1.48825000 | 0.86776100  |
| H | 0.57960100  | -1.23251500 | -1.71854500 |
| H | 0.98212600  | 1.17382200  | -1.74654300 |
| C | 5.12523600  | -1.48929700 | -0.22531500 |
| C | 6.48059100  | -1.62742400 | 0.07947300  |
| C | 7.23215300  | -0.48515800 | 0.36775900  |
| C | 6.60684900  | 0.76460900  | 0.34101800  |
| C | 5.25159900  | 0.89837900  | 0.03839200  |
| C | 4.47745600  | -0.24871600 | -0.25077000 |
| H | 4.56715100  | -2.39194000 | -0.45294200 |
| H | 6.92777100  | -2.61502800 | 0.08547600  |
| H | 7.20835900  | 1.64233000  | 0.56395700  |
| C | -0.09967200 | 0.11407300  | 1.40732900  |
| H | -0.48199900 | 1.06136200  | 1.80073800  |
| H | -0.80980700 | -0.66751000 | 1.69244500  |
| H | 0.84768500  | -0.09143300 | 1.91252300  |
| C | -1.29132200 | 0.52996600  | -0.77347300 |
| H | -1.24670500 | 0.28840400  | -1.84883300 |
| C | 0.09547000  | 2.55869500  | -0.38663100 |
| H | 0.24709600  | 2.92720100  | 0.63481700  |
| H | 0.35821400  | 3.37998400  | -1.06071900 |
| C | -1.37299900 | 2.07715500  | -0.59166200 |
| H | -1.84188200 | 2.56071600  | -1.45502000 |
| H | -1.99580800 | 2.30263600  | 0.28096800  |
| O | -2.37155400 | -0.19389200 | -0.19573500 |
| C | -3.58483900 | -0.08735900 | -0.92244200 |
| H | -3.91435300 | 0.96151200  | -0.96891900 |
| H | -3.47725600 | -0.48018800 | -1.94125300 |
| N | -4.58044100 | -0.88203300 | -0.26802900 |
| C | -5.81042200 | -1.87110600 | 1.47837500  |
| H | -6.66624400 | -1.68080600 | 2.13015600  |
| H | -5.09050500 | -2.47612200 | 2.03802000  |
| C | -6.16468400 | -2.55599400 | 0.15105100  |
| H | -7.16325900 | -2.27655400 | -0.20714700 |
| H | -6.11808400 | -3.64690100 | 0.18305400  |
| C | -5.13611900 | -2.01064900 | -0.84036900 |
| O | -4.86234500 | -2.45341000 | -1.94072900 |
| C | -6.09691500 | 0.62243500  | 1.05929300  |
| O | -6.38433800 | 1.22599900  | 2.06961300  |
| O | -6.63683700 | 0.87132500  | -0.15044300 |

|   |             |             |             |
|---|-------------|-------------|-------------|
| C | -7.60772300 | 1.93371300  | -0.18268500 |
| H | -7.15640800 | 2.87275900  | 0.14741300  |
| H | -7.92892200 | 2.00356900  | -1.22191300 |
| H | -8.45313300 | 1.69769100  | 0.46875600  |
| C | -5.10998100 | -0.55007500 | 1.04174700  |
| H | -4.30531500 | -0.28130000 | 1.73112700  |
| O | 8.56422400  | -0.48135500 | 0.67935700  |
| C | 9.24358300  | -1.72464000 | 0.71218000  |
| H | 10.27775500 | -1.49530700 | 0.97676900  |
| H | 8.81845700  | -2.39952600 | 1.46745300  |
| H | 9.22297100  | -2.22421500 | -0.26589500 |

**Methyl-(R)-1-(((8R,9S,13S,14S,17S)-3-methoxy-13-methyl-7,8,9,11,12,13,14,15,16,17-decahydro-6H-cyclopenta[a]phenanthren-17-yl)oxy)methyl)-5-oxopyrrolidin-2-carboxilate, 4b.**

|   |             |             |             |
|---|-------------|-------------|-------------|
| C | 2.86869700  | -0.67833300 | 0.18726500  |
| C | 1.66191000  | -0.45307300 | -0.76646000 |
| C | 1.91884500  | 0.97281200  | -1.34386500 |
| C | 3.27506300  | 1.36738700  | -0.72290900 |
| C | 4.34774700  | 0.48329600  | -1.39428800 |
| C | 4.06604600  | -0.91837300 | -0.77603600 |
| C | 3.18297300  | 0.77266700  | 0.71349800  |
| C | 2.08615300  | 1.40587400  | 1.58463700  |
| C | 4.49264400  | 0.88291700  | 1.51234300  |
| C | 2.66731900  | -1.78480900 | 1.20816200  |
| C | -3.21808900 | 1.09585100  | -0.23455600 |
| C | -2.50213700 | 0.05115000  | 0.62267600  |
| C | -3.50656300 | -0.74999400 | 1.50013500  |
| C | -3.75203800 | -2.03886100 | 0.70802500  |
| C | -2.52319900 | -2.18345800 | -0.18069500 |
| C | -4.19573600 | 3.24540300  | -0.18273200 |
| C | -0.68945200 | -0.73082300 | -0.95394900 |
| H | 4.24869000  | 0.48972000  | -2.48158600 |
| H | 5.35739600  | 0.82760200  | -1.16621100 |
| H | 3.82391300  | -1.67079500 | -1.52965900 |
| H | 4.92836000  | -1.29522300 | -0.22416100 |
| H | 1.11975800  | 1.64568200  | -1.02939000 |
| H | 1.94930800  | 0.98799400  | -2.43525100 |
| H | 1.67400700  | -1.21547000 | -1.55460200 |
| H | 3.48464300  | 2.43776800  | -0.77281600 |
| H | 2.03807400  | 0.90803800  | 2.55683200  |
| H | 2.32206100  | 2.45786100  | 1.77212700  |
| H | 1.09430100  | 1.34906100  | 1.14525300  |
| H | 4.71310800  | 1.93348600  | 1.72233800  |
| H | 4.39664700  | 0.37663100  | 2.47630400  |
| H | 5.36008200  | 0.46228400  | 1.00663500  |
| H | 2.47460700  | -2.74076900 | 0.71303500  |
| H | 3.55917300  | -1.90867500 | 1.82791800  |
| H | 1.81737800  | -1.58133000 | 1.86008200  |
| O | 0.41687300  | -0.57823300 | -0.07539100 |
| H | -0.82315900 | 0.17081400  | -1.56311200 |
| H | -0.54786100 | -1.59537000 | -1.60875900 |



|   |             |             |             |
|---|-------------|-------------|-------------|
| H | -1.77155000 | 0.57142300  | 1.24335000  |
| H | -3.03084600 | -0.97331300 | 2.45558600  |
| H | -4.41104200 | -0.17971300 | 1.70557500  |
| H | -3.86957900 | -2.92452400 | 1.33044900  |
| H | -4.62808300 | -1.97078900 | 0.05779500  |
| N | -1.86741200 | -0.97260600 | -0.17903200 |
| O | -2.18186700 | -3.16977000 | -0.79738100 |
| O | -3.53435600 | 0.96059700  | -1.38825200 |
| O | -3.47294500 | 2.19875100  | 0.49443700  |
| H | -4.30940900 | 4.04023300  | 0.54945900  |
| H | -3.63207300 | 3.59499700  | -1.04686300 |
| H | -5.16875000 | 2.88204800  | -0.51191000 |

**(5R,6S,8aS)-5,6-dihidroxi-5,8a-dimethyl-3-(propan-2-iliden)octahidronaftalen-2(1H)-ona, Cuauhtemona, 5.**

|   |             |             |             |
|---|-------------|-------------|-------------|
| C | -1.90200500 | -1.80085600 | -0.57291100 |
| C | -3.16274700 | -1.04120100 | -0.15125200 |
| C | -3.02793000 | 0.46019300  | -0.40252100 |
| C | -1.79675000 | 1.08386100  | 0.29812400  |
| C | -0.52354700 | 0.25004200  | -0.04487600 |
| C | 0.74785700  | 0.82057200  | 0.60182900  |
| C | 2.02529400  | 0.15611300  | 0.10618700  |
| C | 1.94409800  | -1.32412300 | -0.09066000 |
| C | 0.61092900  | -1.88503800 | -0.56877000 |
| C | -0.62913200 | -1.29327500 | 0.13581900  |
| C | 3.16787500  | 0.83137800  | -0.14748000 |
| C | 4.42821800  | 0.20815400  | -0.69101600 |
| C | 3.31431700  | 2.31634300  | 0.06979200  |
| C | -0.61365700 | -1.78480700 | 1.59853500  |
| C | -2.07752000 | 1.28438500  | 1.78737600  |
| H | -0.41084000 | 0.39565700  | -1.12616700 |
| H | -1.77577600 | -1.68580200 | -1.65289500 |
| H | -2.02886100 | -2.87106100 | -0.38268000 |
| H | -4.02985800 | -1.41802800 | -0.70372200 |
| H | -3.38647400 | -1.20702500 | 0.90648800  |
| H | -3.91806800 | 0.99028100  | -0.04661400 |
| H | 0.65216200  | -2.97074400 | -0.46128700 |
| H | 0.54752700  | -1.66382600 | -1.64191000 |
| H | 0.69147000  | 0.70761100  | 1.69034700  |
| H | 0.76426400  | 1.88903100  | 0.40465600  |
| H | -0.54384300 | -2.87545600 | 1.61202800  |
| H | 0.24221600  | -1.40333800 | 2.15789800  |
| H | -1.51289000 | -1.51266900 | 2.14918500  |
| H | 4.89652900  | 0.89250900  | -1.40522200 |
| H | 5.14906600  | 0.05168900  | 0.11858000  |
| H | 4.26906100  | -0.75706900 | -1.16176400 |
| H | 3.40349800  | 2.83484800  | -0.89140500 |
| H | 2.50098900  | 2.77165700  | 0.62826900  |
| H | 4.24555000  | 2.51296600  | 0.61064800  |
| O | 2.88604500  | -2.07577300 | 0.09314500  |
| H | -2.94722400 | 1.93419400  | 1.89877900  |
| H | -2.26966200 | 0.35287300  | 2.31519500  |

|   |             |            |             |
|---|-------------|------------|-------------|
| H | -1.23446200 | 1.78066100 | 2.26746900  |
| O | -1.62039300 | 2.41390000 | -0.21198500 |
| H | -1.80831200 | 2.36980500 | -1.16037500 |
| O | -2.86592700 | 0.72641700 | -1.81275900 |
| H | -3.72565900 | 0.67444400 | -2.24176600 |

**Methyl-(2S)-1-(((1R,2S,4aS)-1-hydroxy-1,4a-dimethyl-6-oxo-7-(propan-2-  
iliden)decahydronaphtalen-2-yl)oxy)methyl)-5-oxopirrolidine-2-carboxylate, 5a.**

|   |             |             |             |
|---|-------------|-------------|-------------|
| C | 1.31688200  | -2.13183600 | -1.68856600 |
| C | 0.13778200  | -2.74337500 | -0.92698500 |
| C | -0.54192400 | -1.70028300 | -0.03372700 |
| C | 0.44425300  | -1.06662900 | 0.98754800  |
| C | 1.69063900  | -0.52765100 | 0.23282700  |
| C | 2.70482000  | 0.15419400  | 1.16585100  |
| C | 3.82145800  | 0.87083800  | 0.41821300  |
| C | 4.34475800  | 0.16276500  | -0.79062300 |
| C | 3.34329700  | -0.64849800 | -1.60135200 |
| C | 2.37960000  | -1.51132100 | -0.75754400 |
| C | 4.32286700  | 2.06724500  | 0.79592200  |
| C | 5.38660400  | 2.82610800  | 0.04413000  |
| C | -3.71586400 | 0.24555900  | 1.28281300  |
| C | 3.85717600  | 2.80600000  | 2.02532200  |
| C | 3.21437300  | -2.62921000 | -0.09724400 |
| C | 0.72367100  | -2.07439000 | 2.11361600  |
| C | -3.15899400 | 1.12389900  | 0.16544700  |
| C | -3.99226300 | 2.39221500  | -0.13561400 |
| C | -3.81183400 | 2.60525200  | -1.64319400 |
| C | -3.42742900 | 1.23814400  | -2.19054800 |
| C | -5.60321900 | -0.88848600 | 2.13381600  |
| C | -2.43514800 | -0.82568500 | -1.26772500 |
| H | 1.26786200  | 0.26423600  | -0.39525400 |
| H | 0.92940900  | -1.35400400 | -2.35203100 |
| H | 1.78324100  | -2.88778900 | -2.32780700 |
| H | -0.59836500 | -3.13900200 | -1.63325000 |
| H | 0.45954100  | -3.59273500 | -0.31870600 |
| H | -1.35589900 | -2.17074100 | 0.53475900  |
| H | 3.90794400  | -1.25766200 | -2.30987900 |
| H | 2.75541200  | 0.07249700  | -2.18342300 |
| H | 3.15057400  | -0.58896900 | 1.83683700  |
| H | 2.15606700  | 0.84728100  | 1.79643200  |
| H | 3.76627900  | -3.17114000 | -0.86943700 |
| H | 3.95159400  | -2.23889500 | 0.60656900  |
| H | 2.60641900  | -3.35808800 | 0.43635500  |
| H | 5.16153900  | 3.89683600  | 0.07213300  |
| H | 6.35862400  | 2.69278700  | 0.53095000  |
| H | 5.50401100  | 2.50548000  | -0.98641500 |
| H | 3.30573400  | 3.70912700  | 1.74063500  |
| H | 3.22977300  | 2.21961800  | 2.69110000  |
| H | 4.72792300  | 3.14605000  | 2.59515400  |
| O | 5.50796000  | 0.22531900  | -1.15045700 |
| O | -1.09833500 | -0.65512200 | -0.83771500 |
| H | -0.20808700 | -2.28045500 | 2.64759800  |

|   |             |             |             |
|---|-------------|-------------|-------------|
| H | 1.12092400  | -3.02493700 | 1.76257400  |
| H | 1.42607200  | -1.65337300 | 2.83204500  |
| O | -0.14191900 | 0.09585900  | 1.58594900  |
| H | -1.01131000 | -0.12474600 | 1.95603400  |
| H | -2.48832400 | -1.08530400 | -2.32680400 |
| H | -2.91919900 | -1.61156300 | -0.67504300 |
| H | -2.98774800 | 3.28711200  | -1.87120000 |
| H | -4.69903100 | 2.98369600  | -2.14887900 |
| H | -3.65343700 | 3.23444200  | 0.46607300  |
| H | -5.04014800 | 2.20528900  | 0.09604900  |
| N | -3.14673700 | 0.41766600  | -1.11456400 |
| O | -3.35440200 | 0.91326000  | -3.35580400 |
| O | -3.04987100 | -0.16426600 | 2.20926500  |
| O | -5.01117300 | -0.04131400 | 1.12759700  |
| H | -5.09461900 | -1.85123400 | 2.16263800  |
| H | -5.53446300 | -0.41447100 | 3.11198100  |
| H | -6.64042600 | -1.00944700 | 1.83439500  |
| H | -2.13783400 | 1.36740600  | 0.46479600  |

**Methyl-(2R)-1-(((1R,2S,4aS)-1-hydroxy-1,4a-dimethyl-6-oxo-7-(propan-2-  
iliden)decahydronaphtalen-2-yl)oxy)methyl)-5-oxopirrolidine-2-carboxylate, 5b.**

|   |             |             |             |
|---|-------------|-------------|-------------|
| C | 0.42469500  | -2.43175100 | -1.09643900 |
| C | -0.35215600 | -3.01409400 | 0.08748100  |
| C | -0.65727100 | -1.94530600 | 1.13762300  |
| C | 0.61094200  | -1.22550600 | 1.65869900  |
| C | 1.46368600  | -0.72649600 | 0.45203900  |
| C | 2.73833100  | 0.00940100  | 0.89331300  |
| C | 3.46936500  | 0.69068600  | -0.25590100 |
| C | 3.50913300  | -0.08075300 | -1.53845800 |
| C | 2.29645100  | -0.94014800 | -1.86656000 |
| C | 1.74839600  | -1.76006100 | -0.67793400 |
| C | 4.05907400  | 1.90200000  | -0.15364800 |
| C | 4.74465100  | 2.61900100  | -1.28902300 |
| C | 4.09646500  | 2.69743000  | 1.12698400  |
| C | 2.79602600  | -2.83848000 | -0.33049300 |
| C | 1.34435000  | -2.11083500 | 2.66664600  |
| C | -2.47391700 | 1.93269100  | 0.10727500  |
| C | -3.75548000 | 1.15337200  | 0.42558000  |
| C | -4.94283900 | 1.68899700  | -0.41524500 |
| C | -4.96638800 | 0.78651000  | -1.65619300 |
| C | -4.27982600 | -0.49485700 | -1.20939800 |
| C | -0.70590200 | 3.20168200  | 1.02911000  |
| C | -2.90314500 | -1.21959800 | 0.70154200  |
| H | 0.81813100  | 0.02446300  | -0.02013400 |
| H | -0.20975800 | -1.69311300 | -1.59312300 |
| H | 0.62545400  | -3.21680300 | -1.83158400 |
| H | -1.28847600 | -3.45479600 | -0.26525700 |
| H | 0.20256900  | -3.82844000 | 0.56195200  |
| H | -1.16588300 | -2.38752500 | 2.00331400  |
| H | 2.56535800  | -1.58419000 | -2.70595400 |
| H | 1.51269500  | -0.25619000 | -2.21618700 |
| H | 3.42283500  | -0.69697600 | 1.37607000  |

|   |             |             |             |
|---|-------------|-------------|-------------|
| H | 2.45634200  | 0.72989000  | 1.65672000  |
| H | 3.02645200  | -3.41854700 | -1.22758400 |
| H | 3.73606300  | -2.41107200 | 0.02279500  |
| H | 2.44975500  | -3.54068800 | 0.42648900  |
| H | 4.54360800  | 3.69254700  | -1.21992500 |
| H | 5.82985400  | 2.49273600  | -1.21306500 |
| H | 4.45420500  | 2.25702800  | -2.27045800 |
| H | 3.50636600  | 3.61507200  | 1.02441300  |
| H | 3.74466700  | 2.15881100  | 2.00276600  |
| H | 5.12486900  | 3.01889700  | 1.32199800  |
| O | 4.44791900  | -0.03206400 | -2.31414600 |
| O | -1.51400200 | -0.92832500 | 0.57981500  |
| H | 0.67076300  | -2.33789000 | 3.49478700  |
| H | 1.69344900  | -3.04676500 | 2.23641600  |
| H | 2.20420400  | -1.58329100 | 3.07883500  |
| O | 0.19408300  | -0.08532800 | 2.42734200  |
| H | -0.54903500 | 0.31310000  | 1.95186300  |
| H | -3.14522900 | -2.18585300 | 0.25428800  |
| H | -3.17567300 | -1.21996500 | 1.76521000  |
| H | -4.38657700 | 1.20718000  | -2.47977600 |
| H | -5.96700800 | 0.56415000  | -2.02455800 |
| H | -4.82990900 | 2.74518300  | -0.65306600 |
| H | -5.85922300 | 1.56701700  | 0.16437700  |
| N | -3.66588900 | -0.23704400 | 0.00318000  |
| O | -4.27046700 | -1.56414500 | -1.77886800 |
| O | -1.88083400 | 2.38508600  | 1.22811900  |
| O | -2.06706300 | 2.14523200  | -1.00543600 |
| H | -0.35481300 | 3.44943100  | 2.02669700  |
| H | 0.05220900  | 2.64563200  | 0.48046700  |
| H | -0.96840500 | 4.10141200  | 0.47376300  |
| H | -3.94356700 | 1.21188900  | 1.49858900  |

**(S)-1-(naphtalen-2-yl)-ethan-1-ol 6**

|   |             |             |             |
|---|-------------|-------------|-------------|
| C | -1.36761700 | 0.22189400  | -0.21366100 |
| C | -0.45679000 | -0.79678200 | -0.08693800 |
| C | 0.93483700  | -0.53485000 | -0.01212800 |
| C | 1.39458000  | 0.81481000  | -0.07127100 |
| C | 0.43450700  | 1.84817500  | -0.21034500 |
| C | -0.90207900 | 1.55969900  | -0.28151300 |
| H | 1.54094500  | -2.60032200 | 0.16198900  |
| H | -0.80374600 | -1.82152500 | -0.05237900 |
| C | 1.88934200  | -1.57429500 | 0.11898900  |
| C | 2.78542000  | 1.07193000  | 0.00382300  |
| H | 0.77450100  | 2.87647700  | -0.26733200 |
| H | -1.61809700 | 2.36651300  | -0.39956000 |
| C | 3.68370400  | 0.04287100  | 0.13254400  |
| C | 3.23045100  | -1.29353600 | 0.19045800  |
| H | 3.13134400  | 2.09890600  | -0.04218500 |
| H | 4.74543900  | 0.25181200  | 0.18948100  |
| H | 3.94887100  | -2.09855400 | 0.29108600  |
| C | -2.85913900 | -0.03325400 | -0.26108400 |

|   |             |             |             |
|---|-------------|-------------|-------------|
| H | -3.28111700 | 0.59401700  | -1.05893200 |
| C | -3.54357100 | 0.32846000  | 1.06049100  |
| H | -3.37736300 | 1.37730100  | 1.31390900  |
| H | -4.62442000 | 0.16991900  | 0.99041800  |
| H | -3.14875900 | -0.28976200 | 1.86908900  |
| O | -3.07645400 | -1.40768200 | -0.58781700 |
| H | -4.01784200 | -1.59405500 | -0.50923000 |

**Methyl-(S)-1-(((S)-1-(naphthalen-2-yl)etoxy)methyl)-5-oxopyrrolidin-2-carboxylate, 6a.**

|   |             |             |             |
|---|-------------|-------------|-------------|
| C | -4.23030600 | -1.80468300 | -0.26021800 |
| C | -3.20933800 | -2.94370700 | -0.34284900 |
| H | -5.13888300 | -1.99067800 | -0.83161100 |
| H | -4.50889900 | -1.61684000 | 0.77623500  |
| H | -3.29854800 | -3.52428100 | -1.26558600 |
| H | -3.25790000 | -3.64508900 | 0.48890900  |
| N | -2.07262900 | -0.91224700 | -0.61245900 |
| C | -1.85582900 | -2.24793800 | -0.36706500 |
| O | -0.76675200 | -2.76516400 | -0.22448000 |
| C | -1.00098400 | 0.01090900  | -0.92598700 |
| H | -0.08326700 | -0.57638000 | -0.97414300 |
| H | -1.20269400 | 0.46558900  | -1.89904800 |
| O | -0.90535100 | 1.08969400  | -0.02041200 |
| C | -0.00265400 | 0.93560900  | 1.10731800  |
| C | 5.70116900  | -1.40615200 | 0.05065300  |
| C | 4.41287400  | -1.40261300 | 0.52093000  |
| C | 3.57467900  | -0.27708800 | 0.33120800  |
| C | 4.09157900  | 0.85648500  | -0.36258400 |
| C | 5.42551700  | 0.82245200  | -0.83459700 |
| C | 6.21290300  | -0.28237400 | -0.63300300 |
| H | 1.86420900  | -1.11825000 | 1.32816400  |
| H | 6.33217300  | -2.27402800 | 0.20178100  |
| H | 4.01699500  | -2.26611600 | 1.04397000  |
| C | 2.23865700  | -0.24498300 | 0.80862900  |
| C | 3.24206000  | 1.97635900  | -0.55244500 |
| H | 5.81660600  | 1.68640200  | -1.36099700 |
| H | 7.23260900  | -0.29722100 | -0.99954000 |
| C | 1.95951200  | 1.97138000  | -0.08002700 |
| C | 1.43393300  | 0.85050900  | 0.61768500  |
| H | 3.62819000  | 2.84289000  | -1.07847800 |
| H | 1.31822200  | 2.83070400  | -0.24001000 |
| H | -0.11876900 | 1.90010800  | 1.60905700  |
| C | -0.44346600 | -0.15243500 | 2.07803100  |
| H | 0.15900800  | -0.10035300 | 2.98791600  |
| H | -1.48861300 | 0.00489700  | 2.34549800  |
| H | -0.33907500 | -1.15289600 | 1.65750200  |
| C | -3.47952000 | -0.56264200 | -0.78912200 |
| H | -3.68859500 | -0.36719100 | -1.84650400 |
| C | -3.83140100 | 0.70132800  | 0.00231900  |
| O | -4.02081900 | 0.73775300  | 1.19026800  |
| O | -3.90869100 | 1.76539400  | -0.81112400 |
| C | -4.13374700 | 3.02591600  | -0.15408900 |

|   |             |            |             |
|---|-------------|------------|-------------|
| H | -4.24244900 | 3.75613500 | -0.95149700 |
| H | -5.03405100 | 2.98047400 | 0.45702900  |
| H | -3.27877700 | 3.26844700 | 0.47583500  |

**Methyl-(R)-1-(((S)-1-(naphthalen-2-yl) ethoxy) methyl)-5-oxopyrrolidin-2-carboxylate, 6b.**

|   |             |             |             |
|---|-------------|-------------|-------------|
| C | 2.29904400  | -2.46379100 | -0.42974500 |
| C | 1.76112300  | -2.11941100 | -1.82049900 |
| C | 2.87867900  | -1.12480100 | 0.09750100  |
| H | 1.48402100  | -2.79259000 | 0.21788800  |
| H | 3.05914000  | -3.24245000 | -0.42654300 |
| H | 0.83460700  | -2.62919500 | -2.08171700 |
| H | 2.48517900  | -2.33133000 | -2.61242200 |
| H | 3.94327700  | -1.04444700 | -0.15075900 |
| N | 2.10793400  | -0.11652200 | -0.63328800 |
| C | 1.54995900  | -0.61323600 | -1.79187600 |
| C | 2.81063100  | -1.08611700 | 1.62873900  |
| O | 1.02088900  | 0.05676200  | -2.65688300 |
| O | 3.79556600  | -1.41461500 | 2.24919400  |
| C | 1.51932300  | -0.69753000 | 2.29903300  |
| H | 0.64868900  | -1.11132700 | 1.78752400  |
| H | 1.54488100  | -1.01810200 | 3.33878400  |
| H | 1.41555400  | 0.38823200  | 2.24584000  |
| C | 2.39192100  | 1.30731600  | -0.51263600 |
| H | 3.42734600  | 1.41173700  | -0.18063700 |
| H | 2.28355300  | 1.73365200  | -1.50859500 |
| O | 1.63366300  | 2.00931100  | 0.44424300  |
| C | 0.36251100  | 2.62193200  | 0.07667300  |
| C | -4.09859400 | -1.59554600 | -1.11200200 |
| C | -3.05502000 | -0.75555800 | -1.40284300 |
| C | -2.46355100 | 0.04358500  | -0.39206300 |
| C | -2.97281900 | -0.04142800 | 0.93838700  |
| C | -4.05375300 | -0.91722700 | 1.20502200  |
| C | -4.60363000 | -1.67656800 | 0.20479400  |
| H | -1.00656200 | 0.95778500  | -1.68044500 |
| H | -4.54254900 | -2.20135600 | -1.89317600 |
| H | -2.66405700 | -0.69078000 | -2.41223000 |
| C | -1.38490100 | 0.92060900  | -0.66719700 |
| C | -2.37410900 | 0.76169700  | 1.93998500  |
| H | -4.44092800 | -0.97800100 | 2.21637800  |
| H | -5.43011400 | -2.34338800 | 0.42071700  |
| C | -1.32867700 | 1.59260400  | 1.63851900  |
| C | -0.80858600 | 1.68161300  | 0.32126500  |
| H | -2.76023700 | 0.71334700  | 2.95242700  |
| H | -0.88497900 | 2.20245400  | 2.41838000  |
| H | 0.28972600  | 3.41388800  | 0.82583500  |
| C | 0.37716100  | 3.28740200  | -1.29420900 |
| H | 1.23068000  | 3.96416200  | -1.37350100 |
| H | 0.42021100  | 2.57161900  | -2.11444200 |
| H | -0.53419100 | 3.87681100  | -1.40980800 |

**(S)-(-)-2-Bromide-  $\alpha$ -methyl benzyl alcohol 7**

|    |             |             |             |
|----|-------------|-------------|-------------|
| C  | 2.11258500  | -0.58793600 | 0.03965800  |
| C  | 2.17044100  | -1.96906000 | -0.08817400 |
| C  | 0.99657500  | -2.70968100 | -0.16149700 |
| C  | -0.23049100 | -2.06150300 | -0.10436500 |
| C  | -0.26819900 | -0.67892200 | 0.02274600  |
| C  | 0.89211100  | 0.09171500  | 0.09481300  |
| H  | 3.02162300  | -0.00681500 | 0.11430400  |
| H  | 3.13228900  | -2.46600300 | -0.12526800 |
| H  | 1.02826100  | -3.78816300 | -0.25788600 |
| H  | -1.15317100 | -2.62357200 | -0.15390400 |
| Br | -2.01572100 | 0.13902200  | 0.10356700  |
| C  | 0.72576100  | 2.26807200  | -1.17270800 |
| H  | 0.69428500  | 3.35678800  | -1.06587400 |
| H  | 1.57161600  | 2.00309300  | -1.81001600 |
| H  | -0.19668000 | 1.95526000  | -1.66379400 |
| C  | 0.87101900  | 1.60362700  | 0.19915400  |
| H  | 0.02299800  | 1.89194900  | 0.82806200  |
| O  | 2.08665900  | 2.01236600  | 0.83689800  |
| H  | 2.11692300  | 2.97490200  | 0.83659100  |

**Methyl-(S)-1-(((S)-1-(2-bromophenyl) ethoxy) methyl)-5-oxopyrrolidine-2-carboxylate, 7a.**

|    |             |             |             |
|----|-------------|-------------|-------------|
| C  | -1.28333000 | 1.78124300  | 0.69241900  |
| C  | -2.02305700 | 2.89435400  | 0.31733700  |
| C  | -3.24837000 | 2.73136800  | -0.31943500 |
| C  | -3.72767800 | 1.45311700  | -0.57303700 |
| C  | -2.97532500 | 0.35004300  | -0.18773100 |
| C  | -1.74048500 | 0.48213700  | 0.44632000  |
| H  | -0.32504800 | 1.90593200  | 1.17960100  |
| H  | -1.64243100 | 3.88729700  | 0.52426900  |
| H  | -3.83413400 | 3.59186800  | -0.61925100 |
| H  | -4.67890000 | 1.30991300  | -1.06739200 |
| Br | -3.72339100 | -1.38815200 | -0.56309400 |
| C  | -1.29353200 | -1.09649700 | 2.34823000  |
| H  | -0.75832100 | -1.99280000 | 2.66834100  |
| H  | -1.06094300 | -0.28076200 | 3.03595800  |
| H  | -2.36178100 | -1.30922300 | 2.41129700  |
| C  | -0.92126200 | -0.70377900 | 0.91338100  |
| H  | -1.10960800 | -1.55247200 | 0.24809400  |
| O  | 0.45845600  | -0.33903200 | 0.78774600  |
| C  | 1.37727800  | -1.39082700 | 1.04255800  |
| H  | 1.53437400  | -1.49245300 | 2.12286200  |
| H  | 1.02361400  | -2.33766900 | 0.62511000  |
| C  | 3.44184400  | 0.05298000  | 0.76412700  |
| C  | 4.43637400  | -1.20368900 | -1.07592200 |
| C  | 4.79942200  | -0.26242400 | 0.08020500  |
| H  | 3.53624900  | 0.13829900  | 1.84751600  |
| H  | 4.28946400  | -0.66914200 | -2.01636100 |
| H  | 5.16678200  | -1.99276000 | -1.25011400 |
| H  | 5.31509300  | 0.64182400  | -0.24001100 |

|   |            |             |             |
|---|------------|-------------|-------------|
| H | 5.43875100 | -0.77272100 | 0.80214400  |
| N | 2.62763300 | -1.09787800 | 0.40852400  |
| O | 2.60440300 | 1.38190600  | -1.02397400 |
| O | 2.70747600 | 2.34539100  | 1.01117600  |
| C | 2.05073000 | 2.59350200  | -1.57148000 |
| H | 1.97122900 | 2.41825000  | -2.64097300 |
| H | 1.06705300 | 2.77959400  | -1.14287400 |
| H | 2.70667300 | 3.43821600  | -1.36394700 |
| O | 2.54492200 | -2.76207400 | -1.18214800 |
| C | 2.86063900 | 1.38973300  | 0.29220500  |
| C | 3.10093600 | -1.81297500 | -0.67218400 |

**Methyl-(R)-1-(((S)-1-(2-bromophenyl)ethoxy)methyl)-5-oxopyrrolidine-2-carboxylate, 7b.**

|    |             |             |             |
|----|-------------|-------------|-------------|
| C  | -2.93793700 | 2.25923000  | -0.25430700 |
| C  | -4.03170300 | 2.28854700  | -1.11059300 |
| C  | -4.63773000 | 1.10002500  | -1.49544900 |
| C  | -4.14297500 | -0.11028300 | -1.02492400 |
| C  | -3.04552100 | -0.12038200 | -0.17460500 |
| C  | -2.41738400 | 1.05989100  | 0.23709100  |
| H  | -2.47748600 | 3.19334000  | 0.03844900  |
| H  | -4.40783300 | 3.23748100  | -1.47265800 |
| H  | -5.49422400 | 1.10676000  | -2.15865400 |
| H  | -4.60621500 | -1.04320000 | -1.31614200 |
| Br | -2.41570100 | -1.83877400 | 0.41566700  |
| C  | -0.96626800 | 2.32757400  | 1.93503000  |
| H  | -0.15319800 | 2.19101400  | 2.64977300  |
| H  | -0.69560600 | 3.15290000  | 1.27465200  |
| H  | -1.85687300 | 2.60655500  | 2.50165600  |
| C  | -1.20867700 | 1.03808300  | 1.15396700  |
| H  | -1.35006300 | 0.22154600  | 1.87097300  |
| O  | -0.08260300 | 0.70254900  | 0.32063000  |
| C  | 1.03747200  | 0.18227600  | 1.01944200  |
| H  | 1.55206300  | 0.98354400  | 1.56490300  |
| H  | 0.74199400  | -0.60610200 | 1.71708800  |
| C  | 3.12246700  | -2.02938600 | -1.14273000 |
| C  | 3.09629000  | -0.73572100 | -1.96511900 |
| H  | 2.79377800  | -2.90603500 | -1.69865400 |
| H  | 4.11092500  | -2.24348400 | -0.73125400 |
| H  | 2.38588200  | -0.81248100 | -2.78811700 |
| H  | 4.06466800  | -0.47134300 | -2.38819300 |
| N  | 1.92803500  | -0.41410900 | 0.06730800  |
| O  | 1.72842200  | -2.58878100 | 0.79431300  |
| C  | 2.17683700  | -1.77402100 | 0.02125800  |
| C  | 2.56872500  | 0.35248600  | -0.98148600 |
| H  | 1.85886800  | 1.02474500  | -1.46293300 |
| C  | 3.69155500  | 1.22854300  | -0.46285200 |
| O  | 3.88138900  | 2.37609000  | -0.67138200 |
| O  | 4.63182200  | 0.42300600  | 0.35066900  |
| C  | 5.64913100  | 0.97425100  | 0.95705400  |
| H  | 5.58867100  | 2.07101200  | 0.75511800  |



**Methyl (S)-Lactate 6**

|   |             |             |             |
|---|-------------|-------------|-------------|
| C | 0.28507000  | -0.30195100 | -0.03960100 |
| O | 1.21812700  | 0.61873200  | -0.30351100 |
| O | 0.51679900  | -1.39309500 | 0.42758700  |
| C | 2.57692500  | 0.24742400  | 0.00714800  |
| H | 2.86563700  | -0.63433300 | -0.56341300 |
| H | 3.18194900  | 1.10450000  | -0.27519600 |
| H | 2.67634200  | 0.03825200  | 1.07146000  |
| C | -1.11836900 | 0.16577100  | -0.39911400 |
| H | -1.10247000 | 0.43196800  | -1.46359300 |
| C | -1.54027100 | 1.39053900  | 0.41404800  |
| H | -1.51498000 | 1.16662100  | 1.48239500  |
| H | -0.88832800 | 2.24083800  | 0.20975000  |
| H | -2.56315200 | 1.65571000  | 0.14497900  |
| O | -2.02889800 | -0.89709700 | -0.20584900 |
| H | -1.52335000 | -1.64256600 | 0.15291900  |

**Methyl-(S)-1-(((S)-1-methoxy-1-oxopropan-2-yl)oxy)methyl)-5-oxopyrrolydin-2-carboxylate, 8a.**

|   |             |             |             |
|---|-------------|-------------|-------------|
| C | -2.22892000 | 1.78415700  | -0.73760700 |
| C | -1.15686800 | 2.80430000  | -0.33549400 |
| H | -3.22630600 | 2.21300600  | -0.82850700 |
| H | -1.96666900 | 1.32199600  | -1.68677300 |
| H | -1.56174400 | 3.62801400  | 0.26010900  |
| H | -0.62190700 | 3.24025700  | -1.17756800 |
| N | -0.83371600 | 0.86192700  | 0.92775000  |
| C | -0.20038300 | 2.01870900  | 0.54864700  |
| O | 0.91700800  | 2.34345600  | 0.89869200  |
| C | -0.26055700 | -0.04952200 | 1.88789300  |
| H | 0.40963100  | 0.53192800  | 2.52573100  |
| H | -1.06813400 | -0.48701400 | 2.47328800  |
| O | 0.42868800  | -1.14939900 | 1.32162900  |
| C | -2.18102300 | 0.71114800  | 0.37202500  |
| H | -2.92613400 | 0.90006600  | 1.15223100  |
| C | -2.42532100 | -0.73491500 | -0.06609100 |
| O | -2.91453600 | -1.55757900 | 0.66767200  |
| O | -2.01827000 | -0.98043200 | -1.31310900 |
| C | -2.05836300 | -2.36041200 | -1.71641100 |
| H | -3.08114500 | -2.73491600 | -1.68713800 |
| H | -1.66573800 | -2.37764900 | -2.72906500 |
| H | -1.43410000 | -2.95457800 | -1.05091500 |
| C | 1.97364100  | -0.33909600 | -0.39374800 |
| O | 3.22019400  | 0.15323400  | -0.51850400 |
| O | 1.15331300  | -0.33378900 | -1.27284600 |
| C | 3.51807600  | 0.76591900  | -1.78385800 |
| H | 2.90316100  | 1.65532400  | -1.91872400 |
| H | 4.57020800  | 1.03483600  | -1.73903300 |
| H | 3.33088000  | 0.06953900  | -2.60059700 |
| C | 1.79352500  | -0.93859400 | 1.00322400  |

|   |            |             |            |
|---|------------|-------------|------------|
| H | 2.24365800 | -0.23693200 | 1.71285500 |
| C | 2.49931600 | -2.29002600 | 1.08784300 |
| H | 2.04366200 | -2.99422600 | 0.38949000 |
| H | 3.55741000 | -2.18593900 | 0.84683700 |
| H | 2.39936700 | -2.69114100 | 2.09671600 |

**Methyl-(R)-1-(((S)-1-methoxy-1-oxopropan-2-yl) oxy)methyl)-5-oxopyrrolydin-2-carboxylate, 8b.**

|   |             |             |             |
|---|-------------|-------------|-------------|
| C | -2.06420500 | 1.22466900  | 1.50582100  |
| C | -1.03589000 | 2.36060700  | 1.55053500  |
| H | -1.71399600 | 0.38104400  | 2.09644300  |
| H | -3.05152400 | 1.51287500  | 1.86593700  |
| H | -0.44300200 | 2.38793700  | 2.46322200  |
| H | -1.49188900 | 3.34714000  | 1.42238600  |
| N | -0.78277700 | 1.21302600  | -0.47209800 |
| C | -0.13732200 | 2.09957400  | 0.35096000  |
| O | 0.94805800  | 2.59985800  | 0.12721500  |
| C | -0.23370800 | 0.78683800  | -1.73402300 |
| H | -1.04772800 | 0.66990500  | -2.44741600 |
| H | 0.45191700  | 1.56505700  | -2.06502100 |
| O | 0.39234800  | -0.48764800 | -1.70584500 |
| C | 1.87957900  | -0.76482000 | 0.21928700  |
| O | 3.16939200  | -0.98555800 | 0.54842100  |
| O | 0.98332000  | -0.75302900 | 1.02002900  |
| C | 3.42131900  | -1.17715800 | 1.95082800  |
| H | 3.13906900  | -0.28580800 | 2.51031900  |
| H | 2.85494300  | -2.02897400 | 2.32643900  |
| H | 4.48964100  | -1.35890400 | 2.03399100  |
| C | 1.75021900  | -0.60049800 | -1.30019900 |
| H | 2.05871400  | -1.56580300 | -1.71495700 |
| C | 2.69235400  | 0.47266200  | -1.85139900 |
| H | 2.51816000  | 1.44079100  | -1.38254300 |
| H | 3.72210400  | 0.17675900  | -1.65615000 |
| H | 2.55591900  | 0.55843800  | -2.93116700 |
| C | -2.10464100 | 0.81175100  | 0.02171900  |
| H | -2.87834900 | 1.36275000  | -0.52580000 |
| C | -2.39626100 | -0.65895700 | -0.28490400 |
| O | -2.83813800 | -1.01616900 | -1.34866100 |
| O | -2.12145300 | -1.48364900 | 0.72934200  |
| C | -2.27627400 | -2.88374000 | 0.43933600  |
| H | -1.61354300 | -3.16618200 | -0.37751800 |
| H | -2.00376900 | -3.40176400 | 1.35469200  |
| H | -3.30645600 | -3.10245100 | 0.16005400  |

**Isoborneol/Borneol**

|   |             |             |             |
|---|-------------|-------------|-------------|
| C | 0.04221500  | 1.64269500  | -1.13920600 |
| C | 0.45574300  | 1.41143900  | 0.32974000  |
| C | -0.19546900 | -0.66354100 | -0.34371400 |

|   |             |             |             |
|---|-------------|-------------|-------------|
| C | -0.42468900 | 0.22847300  | -1.59322500 |
| H | -0.75190300 | 2.38752700  | -1.21702500 |
| H | 0.87854100  | 2.00443400  | -1.73980400 |
| H | -1.46952100 | 0.20945900  | -1.89757700 |
| H | 0.16386600  | -0.14037600 | -2.43516100 |
| C | 1.09124900  | -0.01185500 | 0.28820500  |
| C | -0.84243300 | 1.17414500  | 1.13011200  |
| H | -0.68033500 | 1.23291400  | 2.20821200  |
| H | -1.61671800 | 1.90013900  | 0.87417700  |
| C | -1.27296800 | -0.25756000 | 0.69277600  |
| H | 1.09499700  | 2.19526100  | 0.74144700  |
| C | 1.48862800  | -0.55870100 | 1.67022000  |
| H | 1.81445100  | -1.59948400 | 1.59351600  |
| H | 2.33170700  | 0.01309600  | 2.06833200  |
| H | 0.69300800  | -0.51903500 | 2.41268100  |
| C | -0.16883100 | -2.15399300 | -0.64018900 |
| H | -1.12729000 | -2.47767600 | -1.05277300 |
| H | 0.60704700  | -2.40213500 | -1.36898400 |
| H | 0.01671400  | -2.74233700 | 0.26307100  |
| C | 2.34266500  | -0.11051200 | -0.59755600 |
| H | 3.14560400  | 0.50405500  | -0.18021000 |
| H | 2.70963400  | -1.13980300 | -0.63129500 |
| H | 2.18183200  | 0.21353500  | -1.62414400 |
| H | -1.24110400 | -0.95044800 | 1.53919100  |
| O | -2.57684900 | -0.33241200 | 0.10729900  |
| H | -3.23239900 | -0.23336700 | 0.80497500  |

Mixture of methyl **5-oxo-1-(((1S,2R,4S)-1,7,7-trimethylbicyclo[2.2.1]heptan-2-yl)oxy)methyl)pyrrolidine-2-carboxylate** and methyl **5-oxo-1-(((1S,2S,4S)-1,7,7-trimethylbicyclo[2.2.1]heptan-2-yl)oxy)methyl)pyrrolidine-2-carboxylate**.

|   |             |             |             |
|---|-------------|-------------|-------------|
| C | 2.38416400  | -0.54658000 | 0.71491000  |
| C | 1.36925200  | -1.01809300 | -0.36452700 |
| C | 2.01295100  | -0.54082800 | -1.70177800 |
| C | 3.36262200  | 0.05395600  | -1.25039900 |
| C | 4.24133600  | -1.12736600 | -0.78446500 |
| C | 3.57313900  | -1.53750600 | 0.56169400  |
| C | 2.99460900  | 0.76203400  | 0.08664200  |
| C | 2.00758200  | 1.92805700  | -0.07422000 |
| C | 4.21174500  | 1.31912100  | 0.84408800  |
| C | 1.81784800  | -0.47321000 | 2.12223400  |
| C | -2.42527000 | 1.56816600  | -0.55359300 |
| C | -3.07654300 | 0.20034600  | -0.76513100 |
| C | -4.39041200 | 0.02056600  | 0.04306000  |
| C | -4.37281700 | -1.43897000 | 0.51023000  |
| C | -2.92703300 | -1.88782500 | 0.36979300  |
| C | -1.64529400 | 3.13272400  | 1.02594000  |
| C | -0.93935200 | -1.17395500 | -0.87219200 |
| H | 4.24229100  | -1.93791400 | -1.51600800 |
| H | 5.28069300  | -0.82803000 | -0.64248100 |
| H | 3.22927600  | -2.57400000 | 0.56403900  |

|   |             |             |             |
|---|-------------|-------------|-------------|
| H | 4.26313600  | -1.43507500 | 1.40052900  |
| H | 1.37689600  | 0.21217500  | -2.16891200 |
| H | 2.14317600  | -1.35297200 | -2.42027400 |
| H | 1.28537000  | -2.11062700 | -0.32723500 |
| H | 3.83356300  | 0.69075400  | -2.00180900 |
| H | 1.76295600  | 2.35025200  | 0.90443100  |
| H | 2.46619100  | 2.72675600  | -0.66501200 |
| H | 1.07271500  | 1.64528500  | -0.54990300 |
| H | 4.65389900  | 2.14540400  | 0.28009300  |
| H | 3.90866900  | 1.71954900  | 1.81503200  |
| H | 4.99855300  | 0.58823000  | 1.02260300  |
| H | 1.45026300  | -1.45129200 | 2.44482400  |
| H | 2.58506500  | -0.15733500 | 2.83399100  |
| H | 0.97961900  | 0.22153500  | 2.18240500  |
| O | 0.05817300  | -0.49351300 | -0.13063600 |
| H | -0.92150800 | -0.85164300 | -1.92136900 |
| H | -0.77434500 | -2.25418400 | -0.81441100 |
| H | -3.25501000 | 0.13666800  | -1.84292300 |
| H | -4.38109700 | 0.69132600  | 0.90003300  |
| H | -5.25605500 | 0.26754500  | -0.56979500 |
| H | -4.71176100 | -1.57739700 | 1.53609700  |
| H | -4.97820100 | -2.09321700 | -0.12285000 |
| N | -2.24258000 | -0.91430900 | -0.32860000 |
| O | -2.45341200 | -2.93805800 | 0.74793600  |
| O | -2.14069600 | 2.31093200  | -1.46082500 |
| O | -2.24431300 | 1.85434200  | 0.74140600  |
| H | -1.55719100 | 3.17613000  | 2.10819300  |
| H | -0.66603800 | 3.20207500  | 0.55640200  |
| H | -2.28223700 | 3.93671900  | 0.65775200  |
